# Supplementary material for: Factors associated with COVID-19-related death in people with rheumatic diseases: results from the COVID-19 Global Rheumatology Alliance physician-reported registry
Source: HighWire-hosted journal article supplement (doi:10.1136/annrheumdis-2020-219498), 2021-01-27
Supplement: annrheumdis-2020-219498supp001_data_supplement.pdf [file annrheumdis-2020-219498supp001_data_supplement.pdf]

## SUPPLEMENTARY TABLES

| Supplementary table 1. Patient demographic and clinical characteristics stratified by rheumatic disease diagnostic subgroup |                             |                      |                        |                        |                      |                        |                                           |                      |                        |
|-----------------------------------------------------------------------------------------------------------------------------|-----------------------------|----------------------|------------------------|------------------------|----------------------|------------------------|-------------------------------------------|----------------------|------------------------|
|                                                                                                                             | Inflammatory joint diseases |                      |                        | Rheumatoid arthritis   |                      |                        | Connective tissue diseases and vasculitis |                      |                        |
| Parameter                                                                                                                   | Not deceased                | Deceased             | Total                  | Not deceased           | Deceased             | Total                  | Not deceased                              | Deceased             | Total                  |
| <b>N</b>                                                                                                                    | <b>2158</b>                 | <b>215</b>           | <b>2373</b>            | <b>1224</b>            | <b>170</b>           | <b>1394</b>            | <b>1035</b>                               | <b>158</b>           | <b>1193</b>            |
| <b>General</b>                                                                                                              |                             |                      |                        |                        |                      |                        |                                           |                      |                        |
| Age [years]                                                                                                                 | 55.7 (14.3)                 | 71.6 (11.7)          | 57.1 (14.8)            | 59.2 (13.9)            | 72.5 (11.1)          | 60.8 (14.3)            | 55.1 (16.3)                               | 66.7 (17.4)          | 56.7 (16.9)            |
| ≤ 30 years                                                                                                                  | 103 (4.8)                   | 1 (0.5)              | 104 (4.4)              | 37 (3)                 | 1 (0.6)              | 38 (2.7)               | 73 (7.1)                                  | 8 (5.1)              | 81 (6.8)               |
| 31 – 50 years                                                                                                               | 637 (29.5)                  | 9 (4.2)              | 646 (27.2)             | 264 (21.6)             | 5 (2.9)              | 269 (19.3)             | 337 (32.6)                                | 20 (12.7)            | 357 (29.9)             |
| 51 – 65 years                                                                                                               | 878 (40.7)                  | 45 (20.9)            | 923 (38.9)             | 514 (42)               | 34 (20)              | 548 (39.3)             | 334 (32.3)                                | 35 (22.2)            | 369 (30.9)             |
| 66 – 75 years                                                                                                               | 359 (16.6)                  | 72 (33.5)            | 431 (18.2)             | 262 (21.4)             | 56 (32.9)            | 318 (22.8)             | 155 (15)                                  | 35 (22.2)            | 190 (15.9)             |
| > 75 years                                                                                                                  | 181 (8.4)                   | 88 (40.9)            | 269 (11.3)             | 147 (12)               | 74 (43.5)            | 221 (15.9)             | 136 (13.1)                                | 60 (38)              | 196 (16.4)             |
| Male sex                                                                                                                    | 709 (32.9)                  | 82 (38.1)            | 791 (33.3)             | 292 (23.9)             | 55 (32.4)            | 347 (24.9)             | 240 (23.2)                                | 67 (42.4)            | 307 (25.7)             |
| Ever smoker                                                                                                                 | 443 (24.1)<br>(N=1839)      | 65 (40.1)<br>(N=162) | 508 (25.4)<br>(N=2001) | 260 (25.4)<br>(N=1025) | 56 (43.1)<br>(N=130) | 316 (27.4)<br>(N=1155) | 185 (20.6)<br>(N=897)                     | 36 (27.5)<br>(N=131) | 221 (21.5)<br>(N=1028) |
| <b>Regions</b>                                                                                                              |                             |                      |                        |                        |                      |                        |                                           |                      |                        |
| African Region                                                                                                              | 10 (0.5)                    | 1 (0.5)              | 11 (0.5)               | 7 (0.6)                | 1 (0.6)              | 8 (0.6)                | 2 (0.2)                                   | 1 (0.6)              | 3 (0.3)                |
| Eastern Mediterranean Region                                                                                                | 46 (2.1)                    | 4 (1.9)              | 50 (2.1)               | 33 (2.7)               | 4 (2.4)              | 37 (2.7)               | 37 (3.6)                                  | 8 (5.1)              | 45 (3.8)               |
| European Region                                                                                                             | 1405 (65.1)                 | 157 (73)             | 1562                   | 725 (59.2)             | 121 (71.2)           | 846 (60.7)             | 533 (51.5)                                | 103 (65.2)           | 636 (53.3)             |
| North American Region                                                                                                       | 595 (27.6)                  | 44 (20.5)            | 639 (26.9)             | 392 (32)               | 38 (22.4)            | 430 (30.8)             | 397 (38.4)                                | 35 (22.2)            | 432 (36.2)             |
| South American Region                                                                                                       | 68 (3.2)                    | 4 (1.9)              | 72 (3)                 | 48 (3.9)               | 1 (0.6)              | 49 (3.5)               | 42 (4.1)                                  | 5 (3.2)              | 47 (3.9)               |
| South-East Asian Region                                                                                                     | 8 (0.4)                     | 0                    | 8 (0.3)                | 3 (0.2)                | 0                    | 3 (0.2)                | 2 (0.2)                                   | 0                    | 2 (0.2)                |
| Western Pacific Region                                                                                                      | 26 (1.2)                    | 5 (2.3)              | 31 (1.3)               | 16 (1.3)               | 5 (2.9)              | 21 (1.5)               | 22 (2.1)                                  | 6 (3.8)              | 28 (2.3)               |
| <b>Inflammatory joint diseases</b>                                                                                          |                             |                      |                        |                        |                      |                        |                                           |                      |                        |
| Rheumatoid arthritis                                                                                                        | 1224 (56.7)                 | 170 (79.1)           | 1394                   | 1224 (100)             | 170 (100)            | 1394 (100)             | 53 (5.1)                                  | 9 (5.7)              | 62 (5.2)               |
| Spondyloarthritis                                                                                                           | 416 (19.3)                  | 15 (7)               | 431 (18.2)             | 1 (0.1)                | 0                    | 1 (0.1)                | 2 (0.2)                                   | 0                    | 2 (0.2)                |
| Psoriatic arthritis                                                                                                         | 420 (19.5)                  | 20 (9.3)             | 440 (18.5)             | 1 (0.1)                | 1 (0.6)              | 2 (0.1)                | 8 (0.8)                                   | 0                    | 8 (0.7)                |

|                                                |                                 |                                |                                 |                                 |                                |                                 |                                |                                |                               |
|------------------------------------------------|---------------------------------|--------------------------------|---------------------------------|---------------------------------|--------------------------------|---------------------------------|--------------------------------|--------------------------------|-------------------------------|
| JIA (poly, oligo, not systemic)                | 21 (1)                          | 4 (1.9)                        | 25 (1.1)                        | 2 (0.2)                         | 0                              | 2 (0.1)                         | 0                              | 0                              | 0                             |
| Other inflammatory arthritis                   | 90 (4.2)                        | 8 (3.7)                        | 98 (4.1)                        | 3 (0.2)                         | 0                              | 3 (0.2)                         | 7 (0.7)                        | 1 (0.6)                        | 8 (0.7)                       |
| Total Inflammatory joint diseases              | 2158 (100)                      | 215 (100)                      | 2373 (100)                      | 1224 (100)                      | 170 (100)                      | 1394 (100)                      | 68 (6.6)                       | 10 (6.3)                       | 78 (6.5)                      |
| <b>Connective tissue diseases / Vasculitis</b> |                                 |                                |                                 |                                 |                                |                                 |                                |                                |                               |
| SLE                                            | 20 (0.9)                        | 3 (1.4)                        | 23 (1)                          | 18 (1.5)                        | 3 (1.8)                        | 21 (1.5)                        | 355 (34.3)                     | 36 (22.8)                      | 391 (32.8)                    |
| CTDs (other than SLE)                          | 38 (1.8)                        | 7 (3.3)                        | 45 (1.9)                        | 33 (2.7)                        | 6 (3.5)                        | 39 (2.8)                        | 473 (45.7)                     | 60 (38)                        | 533 (44.7)                    |
| Vasculitis                                     | 14 (0.6)                        | 1 (0.5)                        | 15 (0.6)                        | 6 (0.5)                         | 1 (0.6)                        | 7 (0.5)                         | 258 (24.9)                     | 68 (43)                        | 326 (27.3)                    |
| Total CTD                                      | 68 (3.2)                        | 10 (4.7)                       | 78 (3.3)                        | 53 (4.3)                        | 9 (5.3)                        | 62 (4.4)                        | 1035 (100)                     | 158 (100)                      | 1193 (100)                    |
| <b>Other RMDs</b>                              |                                 |                                |                                 |                                 |                                |                                 |                                |                                |                               |
| Total                                          | 58 (2.7)                        | 12 (5.6)                       | 70 (2.9)                        | 30 (2.5)                        | 6 (3.5)                        | 36 (2.6)                        | 37 (3.6)                       | 13 (8.2)                       | 50 (4.2)                      |
|                                                |                                 |                                |                                 |                                 |                                |                                 |                                |                                |                               |
| <b>Disease activity</b>                        | <i>N=1563</i>                   | <i>N=168</i>                   | <i>N=1731</i>                   | <i>N=943</i>                    | <i>N=131</i>                   | <i>N=1074</i>                   | <i>N=822</i>                   | <i>N=118</i>                   | <i>N=940</i>                  |
| Remission                                      | 488 (31.2)                      | 54 (32.1)                      | 542 (31.3)                      | 291 (30.9)                      | 40 (30.5)                      | 331 (30.8)                      | 256 (31.1)                     | 32 (27.1)                      | 288 (30.6)                    |
| Minimal/low disease activity                   | 771 (49.3)                      | 65 (38.7)                      | 836 (48.3)                      | 464 (49.2)                      | 51 (38.9)                      | 515 (48)                        | 421 (51.2)                     | 38 (32.2)                      | 459 (48.8)                    |
| Moderate disease activity                      | 264 (16.9)                      | 38 (22.6)                      | 302 (17.4)                      | 161 (17.1)                      | 30 (22.9)                      | 191 (17.8)                      | 115 (14)                       | 25 (21.2)                      | 140 (14.9)                    |
| Severe/high disease activity                   | 40 (2.6)                        | 11 (6.5)                       | 51 (2.9)                        | 27 (2.9)                        | 10 (7.6)                       | 37 (3.4)                        | 30 (3.6)                       | 23 (19.5)                      | 53 (5.6)                      |
|                                                |                                 |                                |                                 |                                 |                                |                                 |                                |                                |                               |
| <b>Other outcomes</b>                          |                                 |                                |                                 |                                 |                                |                                 |                                |                                |                               |
| Hospitalised                                   | 774 (38.1)<br>( <i>N=2030</i> ) | 201 (95.3)<br>( <i>N=211</i> ) | 975 (43.5)<br>( <i>N=2241</i> ) | 497 (43.3)<br>( <i>N=1148</i> ) | 158 (95.2)<br>( <i>N=166</i> ) | 655 (49.8)<br>( <i>N=1314</i> ) | 522 (52.8)<br>( <i>N=989</i> ) | 153 (98.1)<br>( <i>N=156</i> ) | 675 (59)<br>( <i>N=1145</i> ) |
| Invasive ventilation                           | 37 (2.1)<br>( <i>N=1771</i> )   | 75 (43.9)<br>( <i>N=171</i> )  | 112 (5.8)<br>( <i>N=1942</i> )  | 22 (2.2)<br>( <i>N=993</i> )    | 61 (44.5)<br>( <i>N=137</i> )  | 83 (7.3)<br>( <i>N=1130</i> )   | 28 (3.4)<br>( <i>N=815</i> )   | 44 (38.3)<br>( <i>N=115</i> )  | 72 (7.7)<br>( <i>N=930</i> )  |
|                                                |                                 |                                |                                 |                                 |                                |                                 |                                |                                |                               |
| <b>Comorbidities</b>                           | <i>N=2143</i>                   | <i>N=214</i>                   | <i>N=2357</i>                   | <i>N=1215</i>                   | <i>N=169</i>                   | <i>N=1384</i>                   | <i>N=1026</i>                  | <i>N=155</i>                   | <i>N=1181</i>                 |
| Hypertension                                   | 658 (30.7)                      | 116 (54.2)                     | 774 (32.8)                      | 423 (34.8)                      | 90 (53.3)                      | 513 (37.1)                      | 385 (37.5)                     | 87 (56.1)                      | 472 (40)                      |
| Cardiovascular disease                         | 183 (8.5)                       | 71 (33.2)                      | 254 (10.8)                      | 126 (10.4)                      | 54 (32)                        | 180 (13)                        | 121 (11.8)                     | 43 (27.7)                      | 164 (13.9)                    |
| Cerebrovascular disease                        | 49 (2.3)                        | 10 (4.7)                       | 59 (2.5)                        | 38 (3.1)                        | 8 (4.7)                        | 46 (3.3)                        | 34 (3.3)                       | 8 (5.2)                        | 42 (3.6)                      |
| Chronic lung disease                           | 332 (15.5)                      | 78 (36.4)                      | 410 (17.4)                      | 231 (19)                        | 65 (38.5)                      | 296 (21.4)                      | 234 (22.8)                     | 58 (37.4)                      | 292 (24.7)                    |
| Chronic kidney disease                         | 83 (3.9)                        | 27 (12.6)                      | 110 (4.7)                       | 61 (5)                          | 21 (12.4)                      | 82 (5.9)                        | 85 (8.3)                       | 42 (27.1)                      | 127 (10.8)                    |
| Obesity (BMI ≥ 30)                             | 370 (17.3)                      | 38 (17.8)                      | 408 (17.3)                      | 205 (16.9)                      | 27 (16)                        | 232 (16.8)                      | 155 (15.1)                     | 19 (12.3)                      | 174 (14.7)                    |
| Morbid obesity (BMI ≥ 40)                      | 51 (2.4)                        | 8 (3.7)                        | 59 (2.5)                        | 28 (2.3)                        | 8 (4.7)                        | 36 (2.6)                        | 50 (4.9)                       | 8 (5.2)                        | 58 (4.9)                      |
| Diabetes                                       | 260 (12.1)                      | 55 (25.7)                      | 315 (13.4)                      | 176 (14.5)                      | 39 (23.1)                      | 215 (15.5)                      | 126 (12.3)                     | 36 (23.2)                      | 162 (13.7)                    |

|                                           |            |           |            |            |           |            |            |           |            |
|-------------------------------------------|------------|-----------|------------|------------|-----------|------------|------------|-----------|------------|
| Cancer                                    | 98 (4.6)   | 23 (10.7) | 121 (5.1)  | 68 (5.6)   | 18 (10.7) | 86 (6.2)   | 61 (5.9)   | 20 (12.9) | 81 (6.9)   |
| Other comorbidities                       | 509 (23.8) | 73 (34.1) | 582 (24.7) | 216 (17.8) | 48 (28.4) | 264 (19.1) | 230 (22.4) | 45 (29.0) | 275 (23.3) |
| Number of comorbidities                   | 1.2 (1.3)  | 2.5 (1.7) | 1.4 (1.4)  | 1.3 (1.3)  | 2.3 (1.6) | 1.4 (1.4)  | 1.5 (1.4)  | 2.5 (1.5) | 1.6 (1.4)  |
| No comorbidity                            | 770 (35.9) | 18 (8.4)  | 788 (33.4) | 397 (32.7) | 16 (9.5)  | 413 (29.8) | 267 (26)   | 10 (6.5)  | 277 (23.5) |
| One comorbidity                           | 639 (29.8) | 50 (23.4) | 689 (29.2) | 374 (30.8) | 39 (23.1) | 413 (29.8) | 357 (34.8) | 31 (20)   | 388 (32.9) |
| Two comorbidities                         | 390 (18.2) | 63 (29.4) | 453 (19.2) | 238 (19.6) | 52 (30.8) | 290 (21)   | 182 (17.7) | 43 (27.7) | 225 (19.1) |
| ≥ 3 comorbidityes                         | 344 (16.1) | 83 (38.8) | 427 (18.1) | 206 (17)   | 62 (36.7) | 268 (19.4) | 220 (21.4) | 71 (45.8) | 291 (24.6) |
|                                           |            |           |            |            |           |            |            |           |            |
| <b>DMARD therapies</b>                    |            |           |            |            |           |            |            |           |            |
| csDMARDs monotherapy                      | 487 (22.6) | 51 (23.7) | 538 (22.7) | 351 (28.7) | 43 (25.3) | 394 (28.3) | 91 (8.8)   | 10 (6.3)  | 101 (8.5)  |
| csDMARDs combination therapy              | 611 (28.3) | 53 (24.7) | 664 (28)   | 440 (35.9) | 51 (30)   | 491 (35.2) | 92 (8.9)   | 12 (7.6)  | 104 (8.7)  |
| Methotrexate monotherapy                  | 430 (19.9) | 41 (19.1) | 471 (19.8) | 306 (25)   | 34 (20)   | 340 (24.4) | 88 (8.5)   | 6 (3.8)   | 94 (7.9)   |
| Methotrexate combination therapy          | 531 (24.6) | 45 (20.9) | 576 (24.3) | 372 (30.4) | 44 (25.9) | 416 (29.8) | 87 (8.4)   | 9 (5.7)   | 96 (8)     |
| Leflunomide monotherapy                   | 57 (2.6)   | 10 (4.7)  | 67 (2.8)   | 45 (3.7)   | 9 (5.3)   | 54 (3.9)   | 3 (0.3)    | 4 (2.5)   | 7 (0.6)    |
| Leflunomide combination therapy           | 114 (5.3)  | 9 (4.2)   | 123 (5.2)  | 98 (8)     | 8 (4.7)   | 106 (7.6)  | 7 (0.7)    | 3 (1.9)   | 10 (0.8)   |
| Sulfasalazine monotherapy                 | 48 (2.2)   | 16 (7.4)  | 64 (2.7)   | 22 (1.8)   | 8 (4.7)   | 30 (2.2)   | 3 (0.3)    | 1 (0.6)   | 4 (0.3)    |
| Sulfasalazine combination therapy         | 124 (5.7)  | 24 (11.2) | 148 (6.2)  | 76 (6.2)   | 20 (11.8) | 96 (6.9)   | 7 (0.7)    | 2 (1.3)   | 9 (0.8)    |
| Antimalarial monotherapy                  | 74 (3.4)   | 8 (3.7)   | 82 (3.5)   | 56 (4.6)   | 8 (4.7)   | 64 (4.6)   | 212 (20.5) | 9 (5.7)   | 221 (18.5) |
| Antimalarial combination therapy          | 175 (8.1)  | 23 (10.7) | 198 (8.3)  | 156 (12.7) | 23 (13.5) | 179 (12.8) | 169 (16.3) | 17 (10.8) | 186 (15.6) |
| Immunosuppressants monotherapy            | 9 (0.4)    | 3 (1.4)   | 12 (0.5)   | 7 (0.6)    | 3 (1.8)   | 10 (0.7)   | 132 (12.8) | 21 (13.3) | 153 (12.8) |
| Immunosuppressants combination therapy    | 20 (0.9)   | 1 (0.5)   | 21 (0.9)   | 16 (1.3)   |           | 16 (1.1)   | 127 (12.3) | 18 (11.4) | 145 (12.2) |
| Mycophenolate mofetil monotherapy         | 3 (0.1)    | 1 (0.5)   | 4 (0.2)    | 2 (0.2)    | 1 (0.6)   | 3 (0.2)    | 64 (6.2)   | 13 (8.2)  | 77 (6.5)   |
| Mycophenolate mofetil combination therapy | 3 (0.1)    | 0         | 3 (0.1)    | 3 (0.2)    | 0         | 3 (0.2)    | 77 (7.4)   | 14 (8.9)  | 91 (7.6)   |
| Azathioprine monotherapy                  | 4 (0.2)    | 1 (0.5)   | 5 (0.2)    | 3 (0.2)    | 1 (0.6)   | 4 (0.3)    | 54 (5.2)   | 4 (2.5)   | 58 (4.9)   |
| Azathioprine combi                        | 12 (0.6)   | 1 (0.5)   | 13 (0.5)   | 9 (0.7)    | 0         | 9 (0.6)    | 39 (3.8)   | 2 (1.3)   | 41 (3.4)   |
| Cyclophosphamide monotherapy              | 0          | 0         | 0          | 0          | 0         | 0          | 9 (0.9)    | 3 (1.9)   | 12 (1)     |
| Cyclophosphamide combination              | 0          | 0         | 0          | 0          | 0         | 0          | 5 (0.5)    | 4 (2.5)   | 9 (0.8)    |
| Tacrolimus monotherapy                    | 0          | 1 (0.5)   | 1 (0)      | 0          | 1 (0.6)   | 1 (0.1)    | 4 (0.4)    | 1 (0.6)   | 5 (0.4)    |
| Tacrolimus combination therapy            | 2 (0.1)    | 0         | 2 (0.1)    | 1 (0.1)    | 0         | 1 (0.1)    | 8 (0.8)    | 0         | 8 (0.7)    |
| Cyclosporin monotherapy                   | 2 (0.1)    | 0         | 2 (0.1)    | 2 (0.2)    | 0         | 2 (0.1)    | 1 (0.1)    | 0         | 1 (0.1)    |

|                                                       |                        |                       |                        |                        |                      |                      |                        |                       |                        |
|-------------------------------------------------------|------------------------|-----------------------|------------------------|------------------------|----------------------|----------------------|------------------------|-----------------------|------------------------|
| Cyclosporin combination therapy                       | 4 (0.2)                | 0                     | 4 (0.2)                | 4 (0.3)                | 0                    | 4 (0.3)              | 8 (0.8)                | 1 (0.6)               | 9 (0.8)                |
| bDMARDs monotherapy                                   | 581 (26.9)             | 29 (13.5)             | 610 (25.7)             | 163 (13.3)             | 19 (11.2)            | 182 (13.1)           | 81 ( 7.8)              | 18 (11.4)             | 99 (8.3)               |
| bDMARD combination therapy                            | 478 (22.2)             | 31 (14.4)             | 509 (21.5)             | 308 (25.2)             | 29 (17.1)            | 337 (24.2)           | 91 (8.8)               | 15 (9.5)              | 106 (8.9)              |
| TNF inhibitors monotherapy                            | 417 (19.3)             | 12 (5.6)              | 429 (18.1)             | 88 (7.2)               | 4 (2.4)              | 92 (6.6)             | 15 (1.4)               | 1 (0.6)               | 16 (1.3)               |
| TNF inhibitors combination therapy                    | 322 (14.9)             | 14 (6.5)              | 336 (14.2)             | 189 (15.4)             | 12 (7.1)             | 201 (14.4)           | 20 (1.9)               | 3 (1.9)               | 23 (1.9)               |
| Abatacept monotherapy                                 | 25 (1.2)               | 4 (1.9)               | 29 (1.2)               | 20 (1.6)               | 4 (2.4)              | 24 (1.7)             | 2 (0.2)                | 0                     | 2 (0.2)                |
| Abatacept combination therapy                         | 43 (2)                 | 5 (2.3)               | 48 (2)                 | 41 (3.3)               | 5 (2.9)              | 46 (3.3)             | 6 (0.6)                | 0                     | 6 (0.5)                |
| B-cell-targeted bDMARDs monotherapy                   | 22 (1)                 | 11 (5.1)              | 33 (1.4)               | 20 (1.6)               | 10 (5.9)             | 30 (2.2)             | 45 (4.3)               | 15 (9.5)              | 60 (5)                 |
| B-cell-targeted bDMARDs combination therapy           | 49 (2.3)               | 11 (5.1)              | 60 (2.5)               | 48 (3.9)               | 11 (6.5)             | 59 (4.2)             | 62 (6)                 | 8 (5.1)               | 70 (5.9)               |
| Rituximab monotherapy                                 | 22 (1)                 | 11 (5.1)              | 33 (1.4)               | 20 (1.6)               | 10 (5.9)             | 30 (2.2)             | 40 (3.9)               | 15 (9.5)              | 55 (4.6)               |
| Rituximab combi                                       | 47 (2.2)               | 11 (5.1)              | 58 (2.4)               | 46 (3.8)               | 11 (6.5)             | 57 (4.1)             | 42 (4.1)               | 7 (4.4)               | 49 (4.1)               |
| Belimumab monotherapy                                 | 0                      | 0                     | 0                      | 0                      | 0                    | 0                    | 5 (0.5)                | 0                     | 5 (0.4)                |
| Belimumab combination therapy                         | 2 (0.1)                | 0                     | 2 (0.1)                | 2 (0.2)                | 0                    | 2 (0.1)              | 21 (2)                 | 1 (0.6)               | 22 (1.8)               |
| IL-6 inhibitors monotherapy                           | 36 (1.7)               | 1 (0.5)               | 37 (1.6)               | 33 (2.7)               | 1 (0.6)              | 34 (2.4)             | 18 (1.7)               | 2 (1.3)               | 20 (1.7)               |
| IL-6 inhibitors combination therapy                   | 31 (1.4)               | 0                     | 31 (1.3)               | 29 (2.4)               | 0                    | 29 (2.1)             | 1 (0.1)                | 2 (1.3)               | 3 (0.3)                |
| IL-1 inhibitors monotherapy                           | 1 (0)                  | 0                     | 1 (0)                  | 0                      | 0                    | 0                    | 1 (0.1)                | 0                     | 1 (0.1)                |
| IL-1 inhibitors combination therapy                   | 3 (0.1)                | 1 (0.5)               | 4 (0.2)                | 3 (0.2)                | 1 (0.6)              | 4 (0.3)              | 1 (0.1)                | 2 (1.3)               | 3 (0.3)                |
| IL-17, IL-23, IL-12/23 inhibitors monotherapy         | 78 (3.6)               | 1 (0.5)               | 79 (3.3)               | 1 (0.1)                | 0                    | 1 (0.1)              | 0                      | 0                     | 0                      |
| IL-17, IL-23, IL-12/23 inhibitors combination therapy | 34 (1.6)               | 0                     | 34 (1.4)               | 1 (0.1)                | 0                    | 1 (0.1)              | 1 (0.1)                | 0                     | 1 (0.1)                |
| tsDMARDs monotherapy                                  | 61 (2.8)               | 5 (2.3)               | 66 (2.8)               | 47 (3.8)               | 4 (2.4)              | 51 (3.7)             | 0                      | 0                     | 0                      |
| tsDMARDs (*) combination therapy                      | 68 (3.2)               | 10 (4.7)              | 78 (3.3)               | 59 (4.8)               | 9 (5.3)              | 68 (4.9)             | 6 (0.6)                | 2 (1.3)               | 8 (0.7)                |
| JAK inhibitors monotherapy                            | 54 (2.5)               | 4 (1.9)               | 58 (2.4)               | 47 (3.8)               | 4 (2.4)              | 51 (3.7)             | 0                      | 0                     | 0                      |
| JAK inhibitors combination therapy                    | 65 (3)                 | 9 (4.2)               | 74 (3.1)               | 59 (4.8)               | 9 (5.3)              | 68 (4.9)             | 5 (0.5)                | 2 (1.3)               | 7 (0.6)                |
| Apremilast monotherapy                                | 7 (0.3)                | 1 (0.5)               | 8 (0.3)                | 0                      | 0                    | 0                    | 0                      | 0                     | 0                      |
| Apremilast combination therapy                        | 3 (0.1)                | 1 (0.5)               | 4 (0.2)                | 0                      | 0                    | 0                    | 0                      | 0                     | 0                      |
| No DMARD therapies                                    | 201 (9.3)              | 38 (17.7)             | 239 (10.1)             | 85 (6.9)               | 25 (14.7)            | 110 (7.9)            | 286 (27.6)             | 67 (42.4)             | 353 (29.6)             |
|                                                       |                        |                       |                        |                        |                      |                      |                        |                       |                        |
| <b>Further therapies</b>                              |                        |                       |                        |                        |                      |                      |                        |                       |                        |
| Glucocorticoids (#)                                   | 521 (24.5)<br>(N=2130) | 101 (48.6)<br>(N=208) | 622 (26.6)<br>(N=2338) | 417 (34.6)<br>(N=1205) | 90 (54.2)<br>(N=166) | 507 (37)<br>(N=1371) | 501 (48.8)<br>(N=1027) | 115 (74.2)<br>(N=155) | 616 (52.1)<br>(N=1182) |

|                                    |                        |                      |                        |                        |                      |                        |                       |                      |                        |
|------------------------------------|------------------------|----------------------|------------------------|------------------------|----------------------|------------------------|-----------------------|----------------------|------------------------|
| 0 mg/d < Glucocorticoids <= 10mg/d | 448 (21.3)<br>(N=2108) | 83 (40.9)<br>(N=203) | 531 (23)<br>(N=2311)   | 366 (30.8)<br>(N=1190) | 74 (46)<br>(N=161)   | 440 (32.6)<br>(N=1351) | 373 (37.3)<br>(N=999) | 68 (47.6)<br>(N=143) | 441 (38.6)<br>(N=1142) |
| Glucocorticoids > 10 mg/d          | 48 (2.3)<br>(N=2108)   | 12 (5.9)<br>(N=203)  | 60 (2.6)<br>(N=2311)   | 34 (2.9)<br>(N=1190)   | 10 (6.2)<br>(N=161)  | 44 (3.3)<br>(N=1351)   | 100 (10)<br>(N=999)   | 35 (24.5)<br>(N=143) | 135 (11.8)<br>(N=1142) |
| NSAID                              | 484 (24.2)<br>(N=2002) | 26 (13.8)<br>(N=188) | 510 (23.3)<br>(N=2190) | 240 (21.3)<br>(N=1129) | 22 (14.8)<br>(N=149) | 262 (20.5)<br>(N=1278) | 112 (11.6)<br>(N=966) | 12 (8.6)<br>(N=140)  | 124 (11.2)<br>(N=1106) |
|                                    |                        |                      |                        |                        |                      |                        |                       |                      |                        |

Data are N (column %) for categorical variables or mean (SD) for continuous variables. Table includes all patients with a non-missing outcome and non-missing values for age, sex and disease modifying anti-rheumatic drugs (DMARDs) (101 patients excluded). Data refers to patients with non-missing values for the respective variable, total N for patients with non-missing values is given in parentheses for variables with missing values. (\*) Includes one patient on a study medication (Lenabasum). (#) Includes patients with a missing glucocorticoid dose.

bDMARD, biologic disease modifying antirheumatic drugs; BMI, body mass index; csDMARD, conventional synthetic disease modifying antirheumatic drugs; CTD, connective tissue diseases; DMARD, disease modifying antirheumatic drugs; IL, interleukin; JAK, Janus kinase; JIA, juvenile idiopathic arthritis; N, number; NSAID, non-steroidal anti-inflammatory drugs; SLE, systemic lupus erythematosus; TNF; tumour necrosis factor; tsDMARD, targeted synthetic disease modifying antirheumatic drugs.

| <b>Supplementary table 2. Patient demographic and clinical characteristics stratified by country (six countries with the highest number of reported cases)</b> |                       |                       |                       |                       |                       |                      |                         |
|----------------------------------------------------------------------------------------------------------------------------------------------------------------|-----------------------|-----------------------|-----------------------|-----------------------|-----------------------|----------------------|-------------------------|
| <b>Parameter</b>                                                                                                                                               | <b>USA</b>            | <b>France</b>         | <b>UK</b>             | <b>Italy</b>          | <b>Spain</b>          | <b>Germany</b>       | <b>Total</b>            |
| <b>N</b>                                                                                                                                                       | <b>1005</b>           | <b>793</b>            | <b>435</b>            | <b>315</b>            | <b>247</b>            | <b>198</b>           | <b>2993</b>             |
| <b>General</b>                                                                                                                                                 |                       |                       |                       |                       |                       |                      |                         |
| Age [years]                                                                                                                                                    | 55.2 (15.1)           | 56.2 (16.3)           | 61.2 (16.4)           | 61.9 (13.7)           | 59.7 (15.7)           | 58.2 (13.8)          | 57.6 (15.6)             |
| < 30 years                                                                                                                                                     | 66 (6.6)              | 39 (4.9)              | 16 (3.7)              | 6 (1.9)               | 10 (4)                | 6 (3)                | 143 (4.8)               |
| 30 – 49 years                                                                                                                                                  | 300 (29.9)            | 268 (33.8)            | 97 (22.3)             | 58 (18.4)             | 56 (22.7)             | 48 (24.2)            | 268 (33.8)              |
| 50 – 65 years                                                                                                                                                  | 390 (38.8)            | 248 (31.3)            | 131 (30.1)            | 107 (34)              | 92 (37.2)             | 93 (47)              | 248 (31.3)              |
| 66 - 75 years                                                                                                                                                  | 146 (14.5)            | 128 (16.1)            | 92 (21.1)             | 93 (29.5)             | 43 (17.4)             | 26 (13.1)            | 528 (17.6)              |
| > 75 years                                                                                                                                                     | 103 (10.2)            | 110 (13.9)            | 99 (22.8)             | 51 (16.2)             | 46 (18.6)             | 25 (12.6)            | 434 (14.5)              |
| Male sex                                                                                                                                                       | 241 (24)              | 272 (34.3)            | 169 (38.9)            | 107 (34)              | 95 (38.5)             | 74 (37.4)            | 958 (32)                |
| Ever smoker                                                                                                                                                    | 261 (27.3)<br>(N=956) | 80 (10.1)<br>(N=793)  | 132 (45.2)<br>(N=292) | 86 (29.5)<br>(N=292)  | 60 (27.5)<br>(N=218)  | 14 (77.8)<br>(N=18)  | 633 (24.6)<br>(N=2569)  |
| <b>Inflammatory joint diseases</b>                                                                                                                             |                       |                       |                       |                       |                       |                      |                         |
| Rheumatoid arthritis                                                                                                                                           | 388 (38.6)            | 247 (31.2)            | 187 (43.0)            | 105 (33.3)            | 88 (35.6)             | 99 (50.0)            | 1114 (37.2)             |
| Spondyloarthritis                                                                                                                                              | 47 (4.7)              | 193 (24.3)            | 29 (6.7)              | 24 (7.6)              | 32 (13)               | 19 (9.6)             | 344 (11.5)              |
| Psoriatic arthritis                                                                                                                                            | 101 (10)              | 74 (9.3)              | 61 (14)               | 64 (20.3)             | 31 (12.6)             | 32 (16.2)            | 363 (12.1)              |
| JIA (poly, oligo, not systemic)                                                                                                                                | 7 (0.7)               | 2 (0.3)               | 2 (0.5)               | 2 (0.6)               | 3 (1.2)               | 0                    | 16 (0.5)                |
| Other inflammatory arthritis                                                                                                                                   | 41 (4.1)              | 15 (1.9)              | 28 (6.4)              | 3 (1)                 | 3 (1.2)               | 0                    | 90 (3)                  |
| Total IJD                                                                                                                                                      | 577 (57.4)            | 531 (67)              | 305 (70.1)            | 198 (62.9)            | 157 (63.6)            | 150 (75.8)           | 1918 (64.1)             |
| <b>Connective tissue diseases / Vasculitis</b>                                                                                                                 |                       |                       |                       |                       |                       |                      |                         |
| Systemic lupus erythematosus                                                                                                                                   | 167 (16.6)            | 50 (6.3)              | 28 (6.4)              | 18 (5.7)              | 27 (10.9)             | 9 (4.5)              | 299 (10)                |
| CTDs (other than SLE)                                                                                                                                          | 186 (18.5)            | 90 (11.3)             | 38 (8.7)              | 53 (16.8)             | 44 (17.8)             | 19 (9.6)             | 430 (14.4)              |
| Vasculitis                                                                                                                                                     | 67 (6.7)              | 71 (9)                | 51 (11.7)             | 44 (14)               | 22 (8.9)              | 18 (9.1)             | 273 (9.1)               |
| Total CTD                                                                                                                                                      | 394 (39.2)            | 211 (26.6)            | 111 (25.5)            | 114 (36.2)            | 85 (34.4)             | 43 (21.7)            | 958 (32)                |
| <b>Other rheumatic diseases</b>                                                                                                                                |                       |                       |                       |                       |                       |                      |                         |
| Total                                                                                                                                                          | 132 (13.1)            | 52 (6.6)              | 53 (12.2)             | 8 (2.5)               | 20 (8.1)              | 13 (6.6)             | 278 (9.3)               |
| <b>Disease activity (DA)</b>                                                                                                                                   |                       |                       |                       |                       |                       |                      |                         |
| Remission                                                                                                                                                      | 211 (22.2)            | N/A                   | 109 (29.9)            | 93 (29.5)             | 113 (46.7)            | 102 (56.4)           | 628 (30.6)              |
| Minimal/low DA                                                                                                                                                 | 521 (54.8)            | N/A                   | 172 (47.3)            | 160 (50.8)            | 108 (44.6)            | 53 (29.3)            | 1014 (49.4)             |
| Moderate DA                                                                                                                                                    | 185 (19.5)            | N/A                   | 69 (19)               | 53 (16.8)             | 17 (7)                | 19 (10.5)            | 343 (16.7)              |
| Severe/high DA                                                                                                                                                 | 33 (3.5)              | N/A                   | 14 (3.8)              | 9 (2.9)               | 4 (1.7)               | 7 (3.9)              | 67 (3.3)                |
| <b>Other outcomes</b>                                                                                                                                          |                       |                       |                       |                       |                       |                      |                         |
| Death                                                                                                                                                          | 70 (7.0)              | 62 (7.8)              | 91 (20.9)             | 53 (16.8)             | 21 (8.5)              | 15 (7.6)             | 312 (10.4)              |
| Hospitalised                                                                                                                                                   | 357 (39.1)<br>(N=914) | 334 (42.1)<br>(N=793) | 275 (65.8)<br>(N=418) | 201 (64.2)<br>(N=313) | 133 (55.6)<br>(N=239) | 60 (30.6)<br>(N=196) | 1360 (47.3)<br>(N=2873) |
| Invasive ventilation                                                                                                                                           | 64 (7.9)<br>(N=807)   | N/A                   | 28 (7.5)<br>(N=371)   | 23 (7.5)<br>(N=308)   | 7 (3)<br>(N=231)      | 15 (7.7)<br>(N=196)  | 137 (5.8)<br>(N=1913)   |

| <b>Comorbidities</b>          | <i>N=1000</i> | <i>N=791</i> | <i>N=434</i> | <i>N=300</i> | <i>N=247</i> | <i>N=192</i> | <i>N=2964</i> |
|-------------------------------|---------------|--------------|--------------|--------------|--------------|--------------|---------------|
| Hypertension                  | 399 (39.9)    | 220 (27.8)   | 140 (32.3)   | 147 (49)     | 103 (41.7)   | 72 (36.4)    | 1081 (36.4)   |
| Cardiovascular disease        | 112 (11.2)    | 76 (9.6)     | 72 (16.6)    | 72 (24)      | 18 (7.3)     | 27 (13.6)    | 377 (12.7)    |
| Cerebrovascular disease       | 27 (2.7)      | 28 (3.5)     | 17 (3.9)     | 14 (4.7)     | 6 (2.4)      | 0            | 92 (3.1)      |
| Chronic lung disease          | 231 (23.1)    | 113 (14.3)   | 108 (24.9)   | 75 (25)      | 54 (21.9)    | 32 (16.2)    | 613 (20.6)    |
| Chronic kidney disease        | 85 (8.5)      | 46 (5.8)     | 28 (6.5)     | 27 (9)       | 11 (4.5)     | 15 (7.6)     | 212 (7.1)     |
| Obesity (BMI ≥ 30)            | 244 (24.4)    | 138 (17.4)   | 39 (9)       | 47 (15.7)    | 31 (12.6)    | 30 (15.2)    | 529 (17.8)    |
| Morbid obesity (BMI ≥ 40)     | 87 (8.7)      | 0            | 11 (2.5)     | 7 (2.3)      | 2 (0.8)      | 7 (3.5)      | 114 (3.8)     |
| Diabetes                      | 171 (17.1)    | 74 (9.4)     | 73 (16.8)    | 42 (14)      | 31 (12.6)    | 17 (8.6)     | 408 (13.7)    |
| Cancer                        | 68 (6.8)      | 36 (4.6)     | 19 (4.4)     | 34 (11.3)    | 23 (9.3)     | 7 (3.5)      | 187 (6.3)     |
| Other comorbidities           | 213 (21.3)    | 159 (20.1)   | 151 (34.8)   | 145 (48.3)   | 67 (27.1)    | 53 (27.6)    | 788 (36.2)    |
| Number of comorbidities       | 1.7 (1.5)     | 1.1 (1.1)    | 1.6 (1.4)    | 2.3 (1.8)    | 1.5 (1.4)    | 1.3 (1.3)    | 1.5 (1.5)     |
| No comorbidity                | 250 (25)      | 277 (35)     | 105 (24.2)   | 44 (14.7)    | 70 (28.3)    | 67 (33.8)    | 813 (27.4)    |
| One comorbidity               | 275 (27.5)    | 276 (34.9)   | 136 (31.3)   | 79 (26.3)    | 77 (31.2)    | 58 (29.3)    | 901 (30.3)    |
| Two comorbidities             | 211 (21.1)    | 143 (18.1)   | 98 (22.6)    | 57 (19)      | 51 (20.6)    | 39 (19.7)    | 599 (20.2)    |
| ≥ 3 comorbidities             | 264 (26.4)    | 95 (12)      | 95 (21.9)    | 120 (40)     | 49 (19.8)    | 34 (17.2)    | 657 (22.1)    |
|                               |               |              |              |              |              |              |               |
| <b>DMARD therapies</b>        |               |              |              |              |              |              |               |
| csDMARDs mono                 | 106 (10.5)    | 159 (20.1)   | 91 (20.9)    | 66 (21)      | 51 (20.6)    | 52 (26.3)    | 525 (17.5)    |
| csDMARDs combi                | 208 (20.7)    | 164 (20.7)   | 84 (19.3)    | 58 (18.4)    | 40 (16.2)    | 33 (16.7)    | 587 (19.6)    |
| Methotrexate mono             | 88 (8.8)      | 151 (19)     | 83 (19.1)    | 55 (17.5)    | 45 (18.2)    | 47 (23.7)    | 469 (15.7)    |
| Methotrexate combi            | 174 (17.3)    | 142 (17.9)   | 78 (17.9)    | 52 (16.5)    | 36 (14.6)    | 33 (16.7)    | 515 (17.2)    |
| Leflunomide mono              | 18 (1.8)      | 8 (1)        | 8 (1.8)      | 11 (3.5)     | 6 (2.4)      | 5 (2.5)      | 56 (1.9)      |
| Leflunomide combi             | 40 (4)        | 22 (2.8)     | 11 (2.5)     | 6 (1.9)      | 7 (2.8)      | 3 (1.5)      | 89 (3)        |
| Sulfasalazine mono            | 7 (0.7)       | 3 (0.4)      | 21 (4.8)     | 4 (1.3)      | 6 (2.4)      | 7 (3.5)      | 48 (1.6)      |
| Sulfasalazine combi           | 33 (3.3)      | 6 (0.8)      | 47 (10.8)    | 10 (3.2)     | 10 (4)       | 2 (1)        | 108 (3.6)     |
| Antimalarial mono             | 120 (11.9)    | 32 (4)       | 20 (4.6)     | 28 (8.9)     | 15 (6.1)     | 8 (4)        | 223 (7.5)     |
| Antimalarial combi            | 132 (13.1)    | 34 (4.3)     | 48 (11)      | 31 (9.8)     | 18 (7.3)     | 10 (5.1)     | 273 (9.1)     |
| Immunosuppressants mono       | 66 (6.6)      | 14 (1.8)     | 23 (5.3)     | 17 (5.4)     | 9 (3.6)      | 10 (5.1)     | 139 (4.6)     |
| Immunosuppressants combi      | 75 (7.5)      | 14 (1.8)     | 17 (3.9)     | 13 (4.1)     | 6 (2.4)      | 2 (1)        | 127 (4.2)     |
| Mycophenolate mofetil mono    | 42 (4.2)      | 8 (1)        | 11 (2.5)     | 6 (1.9)      | 3 (1.2)      | 2 (1)        | 72 (2.4)      |
| Mycophenolate mofetil combi   | 44 (4.4)      | 9 (1.1)      | 13 (3)       | 6 (1.9)      | 3 (1.2)      | 2 (1)        | 77 (2.6)      |
| Azathioprine mono             | 17 (1.7)      | 6 (0.8)      | 9 (2.1)      | 8 (2.5)      | 5 (2)        | 7 (3.5)      | 52 (1.7)      |
| Azathioprine combi            | 24 (2.4)      | 5 (0.6)      | 3 (0.7)      | 4 (1.3)      | 3 (1.2)      | 0            | 39 (1.3)      |
| Cyclophosph. mono             | 2 (0.2)       | 0            | 3 (0.7)      | 2 (0.6)      | 1 (0.4)      | 1 (0.5)      | 9 (0.3)       |
| Cyclophosph. combi            | 6 (0.6)       | 0            | 1 (0.2)      | 1 (0.3)      | 0            | 0            | 8 (0.3)       |
| Tacrolimus mono               | 5 (0.5)       | 0            | 0            | 0            | 0            | 0            | 5 (0.2)       |
| Tacrolimus combi              | 9 (0.9)       | 0            | 0            | 0            | 1 (0.4)      | 0            | 10 (0.3)      |
| Cyclosporin mono              | 0             | 0            | 0            | 1 (0.3)      | 0            | 0            | 1 (0)         |
| Cyclosporin combi             | 1 (0.1)       | 0            | 1 (0.2)      | 4 (1.3)      | 0            | 0            | 6 (0.2)       |
| bDMARDs monotherapy           | 174 (17.3)    | 228 (28.8)   | 53 (12.2)    | 63 (20)      | 44 (17.8)    | 43 (21.7)    | 605 (20.2)    |
| bDMARDs combination therapy   | 178 (17.7)    | 144 (18.2)   | 67 (15.4)    | 48 (15.2)    | 34 (13.8)    | 29 (14.7)    | 500 (16.7)    |
| TNF inhibitors mono           | 100 (10)      | 145 (18.3)   | 29 (6.7)     | 45 (14.3)    | 27 (10.9)    | 26 (13.1)    | 372 (12.4)    |
| TNF inhibitors combi          | 106 (10.5)    | 84 (10.6)    | 39 (9)       | 28 (8.9)     | 19 (7.7)     | 13 (6.6)     | 289 (9.7)     |
| Abatacept mono                | 14 (1.4)      | 6 (0.8)      | 1 (0.2)      | 5 (1.6)      | 0            | 0            | 26 (0.9)      |
| Abatacept combi               | 20 (2)        | 13 (1.6)     | 3 (0.7)      | 2 (0.6)      | 3 (1.2)      | 3 (1.5)      | 44 (1.5)      |
| B-cell affecting bDMARDs mono | 29 (2.9)      | 26 (3.3)     | 10 (2.3)     | 1 (0.3)      | 8 (3.2)      | 3 (1.5)      | 77 (2.6)      |

|                                                                                                                                                                                                                                                                                                                                                                                                                                                                                                                                                                                                                                                                                                                                                                                                                                                                                                                                                                                                                                                                                                                                                                                           |                       |                       |                      |                       |                       |                       |                        |
|-------------------------------------------------------------------------------------------------------------------------------------------------------------------------------------------------------------------------------------------------------------------------------------------------------------------------------------------------------------------------------------------------------------------------------------------------------------------------------------------------------------------------------------------------------------------------------------------------------------------------------------------------------------------------------------------------------------------------------------------------------------------------------------------------------------------------------------------------------------------------------------------------------------------------------------------------------------------------------------------------------------------------------------------------------------------------------------------------------------------------------------------------------------------------------------------|-----------------------|-----------------------|----------------------|-----------------------|-----------------------|-----------------------|------------------------|
| B-cell affecting bDMARDs combi                                                                                                                                                                                                                                                                                                                                                                                                                                                                                                                                                                                                                                                                                                                                                                                                                                                                                                                                                                                                                                                                                                                                                            | 37 (3.7)              | 22 (2.8)              | 20 (4.6)             | 9 (2.9)               | 8 (3.2)               | 10 (5.1)              | 106 (3.5)              |
| Rituximab mono                                                                                                                                                                                                                                                                                                                                                                                                                                                                                                                                                                                                                                                                                                                                                                                                                                                                                                                                                                                                                                                                                                                                                                            | 26 (2.6)              | 26 (3.3)              | 10 (2.3)             | 1 (0.3)               | 7 (2.8)               | 3 (1.5)               | 73 (2.4)               |
| Rituximab combi                                                                                                                                                                                                                                                                                                                                                                                                                                                                                                                                                                                                                                                                                                                                                                                                                                                                                                                                                                                                                                                                                                                                                                           | 24 (2.4)              | 20 (2.5)              | 19 (4.4)             | 7 (2.2)               | 8 (3.2)               | 8 (4)                 | 86 (2.9)               |
| Belimumab mono                                                                                                                                                                                                                                                                                                                                                                                                                                                                                                                                                                                                                                                                                                                                                                                                                                                                                                                                                                                                                                                                                                                                                                            | 3 (0.3)               | 0                     | 0                    | 0                     | 1 (0.4)               | 0                     | 4 (0.1)                |
| Belimumab combi                                                                                                                                                                                                                                                                                                                                                                                                                                                                                                                                                                                                                                                                                                                                                                                                                                                                                                                                                                                                                                                                                                                                                                           | 13 (1.3)              | 2 (0.3)               | 1 (0.2)              | 2 (0.6)               | 1 (0.4)               | 2 (1)                 | 21 (0.7)               |
| IL-6 inhibitors mono                                                                                                                                                                                                                                                                                                                                                                                                                                                                                                                                                                                                                                                                                                                                                                                                                                                                                                                                                                                                                                                                                                                                                                      | 11 (1.1)              | 18 (2.3)              | 3 (0.7)              | 4 (1.3)               | 3 (1.2)               | 6 (3)                 | 45 (1.5)               |
| IL-6 inhibitors combi                                                                                                                                                                                                                                                                                                                                                                                                                                                                                                                                                                                                                                                                                                                                                                                                                                                                                                                                                                                                                                                                                                                                                                     | 12 (1.2)              | 11 (1.4)              | 2 (0.5)              | 3 (1)                 | 3 (1.2)               | 0                     | 31 (1)                 |
| IL-1 inhibitors mono                                                                                                                                                                                                                                                                                                                                                                                                                                                                                                                                                                                                                                                                                                                                                                                                                                                                                                                                                                                                                                                                                                                                                                      | 0                     | 9 (1.1)               | 1 (0.2)              | 0                     | 1 (0.4)               | 0                     | 11 (0.4)               |
| IL-1 inhibitors combi                                                                                                                                                                                                                                                                                                                                                                                                                                                                                                                                                                                                                                                                                                                                                                                                                                                                                                                                                                                                                                                                                                                                                                     | 2 (0.2)               | 0                     | 1 (0.2)              | 2 (0.6)               | 0                     | 0                     | 5 (0.2)                |
| Other IL inhibitors (IL-17, IL-23, IL-12/23 inh.) mono                                                                                                                                                                                                                                                                                                                                                                                                                                                                                                                                                                                                                                                                                                                                                                                                                                                                                                                                                                                                                                                                                                                                    | 19 (1.9)              | 24 (3)                | 9 (2.1)              | 7 (2.2)               | 5 (2)                 | 8 (4)                 | 72 (2.4)               |
| Other IL inhibitors (IL-17, IL-23, IL-12/23 inh.) combi                                                                                                                                                                                                                                                                                                                                                                                                                                                                                                                                                                                                                                                                                                                                                                                                                                                                                                                                                                                                                                                                                                                                   | 3 (0.3)               | 14 (1.8)              | 2 (0.5)              | 6 (1.9)               | 1 (0.4)               | 3 (1.5)               | 29 (1)                 |
| tsDMARDs mono                                                                                                                                                                                                                                                                                                                                                                                                                                                                                                                                                                                                                                                                                                                                                                                                                                                                                                                                                                                                                                                                                                                                                                             | 32 (3.2)              | 10 (1.3)              | 7 (1.6)              | 4 (1.3)               | 3 (1.2)               | 4 (2)                 | 60 (2)                 |
| tsDMARDs (*) combi                                                                                                                                                                                                                                                                                                                                                                                                                                                                                                                                                                                                                                                                                                                                                                                                                                                                                                                                                                                                                                                                                                                                                                        | 43 (4.3)              | 15 (1.9)              | 4 (0.9)              | 9 (2.9)               | 3 (1.2)               | 3 (1.5)               | 77 (2.6)               |
| JAK inhibitors mono                                                                                                                                                                                                                                                                                                                                                                                                                                                                                                                                                                                                                                                                                                                                                                                                                                                                                                                                                                                                                                                                                                                                                                       | 26 (2.6)              | 10 (1.3)              | 7 (1.6)              | 4 (1.3)               | 2 (0.8)               | 4 (2)                 | 53 (1.8)               |
| JAK inhibitors combi                                                                                                                                                                                                                                                                                                                                                                                                                                                                                                                                                                                                                                                                                                                                                                                                                                                                                                                                                                                                                                                                                                                                                                      | 40 (4)                | 15 (1.9)              | 3 (0.7)              | 8 (2.5)               | 3 (1.2)               | 3 (1.5)               | 72 (2.4)               |
| Apremilast mono                                                                                                                                                                                                                                                                                                                                                                                                                                                                                                                                                                                                                                                                                                                                                                                                                                                                                                                                                                                                                                                                                                                                                                           | 6 (0.6)               | 0                     | 0                    | 0                     | 1 (0.4)               | 0                     | 7 (0.2)                |
| Apremilast combi                                                                                                                                                                                                                                                                                                                                                                                                                                                                                                                                                                                                                                                                                                                                                                                                                                                                                                                                                                                                                                                                                                                                                                          | 2 (0.2)               | 0                     | 1 (0.2)              | 1 (0.3)               | 0                     | 0                     | 4 (0.1)                |
| No DMARD therapies                                                                                                                                                                                                                                                                                                                                                                                                                                                                                                                                                                                                                                                                                                                                                                                                                                                                                                                                                                                                                                                                                                                                                                        | 192 (19.1)            | 161 (20.3)            | 98 (22.5)            | 52 (16.5)             | 64 (25.9)             | 35 (17.7)             | 602 (20.1)             |
|                                                                                                                                                                                                                                                                                                                                                                                                                                                                                                                                                                                                                                                                                                                                                                                                                                                                                                                                                                                                                                                                                                                                                                                           |                       |                       |                      |                       |                       |                       |                        |
| <b>Further therapies</b>                                                                                                                                                                                                                                                                                                                                                                                                                                                                                                                                                                                                                                                                                                                                                                                                                                                                                                                                                                                                                                                                                                                                                                  |                       |                       |                      |                       |                       |                       |                        |
| Glucocorticoids (#)                                                                                                                                                                                                                                                                                                                                                                                                                                                                                                                                                                                                                                                                                                                                                                                                                                                                                                                                                                                                                                                                                                                                                                       | 283 (28.6)<br>(N=990) | 253 (31.9)<br>(N=793) | 128 (30)<br>(N=427)  | 165 (52.4)<br>(N=315) | 98 (40.3)<br>(N=243)  | 82 (41.6)<br>(N=197)  | 1009 (34)<br>(N=2965)  |
| 0 mg/d < GC <= 10mg/d                                                                                                                                                                                                                                                                                                                                                                                                                                                                                                                                                                                                                                                                                                                                                                                                                                                                                                                                                                                                                                                                                                                                                                     | 226 (22.9)<br>(N=985) | 205 (25.9)<br>(N=791) | 87 (20.5)<br>(N=425) | 135 (43.7)<br>(N=309) | 64 (30.2)<br>(N=212)  | 74 (37.8)<br>(N=196)  | 791 (27.1)<br>(N=2918) |
| GC > 10 mg/d                                                                                                                                                                                                                                                                                                                                                                                                                                                                                                                                                                                                                                                                                                                                                                                                                                                                                                                                                                                                                                                                                                                                                                              | 52 (5.3)<br>(N=985)   | 45 (5.7)<br>(N=791)   | 37 (8.7)<br>(N=425)  | 24 (7.8)<br>(N=309)   | 3 (1.4)<br>(N=212)    | 6 (3.1)<br>(N=196)    | 167 (5.7)<br>(N=2918)  |
| NSAID                                                                                                                                                                                                                                                                                                                                                                                                                                                                                                                                                                                                                                                                                                                                                                                                                                                                                                                                                                                                                                                                                                                                                                                     | 209 (22.9)<br>(N=914) | 85 (10.7)<br>(N=793)  | 51 (13.3)<br>(N=385) | 53 (18.6)<br>(N=285)  | 52 (21.9)<br>(N=21.9) | 36 (19.7)<br>(N=19.7) | 486 (17.4)<br>(N=2798) |
| <p>Data are N (column %) for categorical variables or mean (SD) for continuous variables. Table includes all patients with a non-missing outcome and non-missing values for age, sex and disease modifying anti-rheumatic drugs (DMARDs) (101 patients excluded). Data refers to patients with non-missing values for the respective variable, total N for patients with non-missing values is given in parentheses for variables with missing values. (*) Includes one patient on a study medication (Lenabasum). (#) Includes patients with a missing glucocorticoid dose.</p> <p>bDMARD, biologic disease modifying antirheumatic drugs; BMI, body mass index; csDMARD, conventional synthetic disease modifying antirheumatic drugs; combi, combination therapy; CTD, connective tissue diseases; DA, disease activity; DMARD, disease modifying antirheumatic drugs; GC, glucocorticoids; IL, interleukin; JAK, Janus kinase; JIA, juvenile idiopathic arthritis; mono, monotherapy; N, number; NSAID, non-steroidal anti-inflammatory drugs; SLE, systemic lupus erythematosus; TNF, tumour necrosis factor; tsDMARD, targeted synthetic disease modifying antirheumatic drugs.</p> |                       |                       |                      |                       |                       |                       |                        |



**Supplementary table 3. Patient demographic and clinical characteristics stratified by main medication of interest**

| Parameter                                     | MTX                    | LEF                  | ANTI-MALARIALS        | SSZ                  | IMMUNO SUPPR.        | TNFi                  | ABA                 | RTX                  | IL-6i               | IL-17/23/12+23i      | JAKi                 | No DMARDs             | TOTAL                  |
|-----------------------------------------------|------------------------|----------------------|-----------------------|----------------------|----------------------|-----------------------|---------------------|----------------------|---------------------|----------------------|----------------------|-----------------------|------------------------|
| <b>N</b>                                      | <b>1237</b>            | <b>203</b>           | <b>665</b>            | <b>222</b>           | <b>338</b>           | <b>804</b>            | <b>83</b>           | <b>193</b>           | <b>90</b>           | <b>116</b>           | <b>134</b>           | <b>739</b>            | <b>3729</b>            |
| <b>General</b>                                |                        |                      |                       |                      |                      |                       |                     |                      |                     |                      |                      |                       |                        |
| Age [years]                                   | 58.3 (14.5)            | 59.5 (12.3)          | 53.3 (15.2)           | 59.0 (14.8)          | 50.1 (15.8)          | 51.1 (13.7)           | 59.0 (15.0)         | 56.2 (15.1)          | 57.7 (16.4)         | 50.1 (11.3)          | 58.3 (13.3)          | 62.8 (16.6)           | 57.0 (15.7)            |
| Male sex                                      | 390 (31.5)             | 44 (21.7)            | 117 (17.6)            | 82 (36.9)            | 93 (27.5)            | 312 (38.8)            | 24 (28.9)           | 60 (31.1)            | 21 (23.3)           | 45 (38.8)            | 18 (13.4)            | 280 (37.9)            | 1195 (32)              |
| Ever smoker                                   | 244 (23.4)<br>(N=1044) | 40 (24.7)<br>(N=162) | 129 (22.2)<br>(N=582) | 66 (37.3)<br>(N=177) | 54 (18.6)<br>(N=290) | 167 (23.6)<br>(N=709) | 20 (27.8)<br>(N=72) | 38 (23.3)<br>(N=163) | 10 (12.5)<br>(N=80) | 21 (20.8)<br>(N=101) | 28 (22.6)<br>(N=124) | 181 (29.8)<br>(N=607) | 776 (24.5)<br>(N=3164) |
| <b>Inflammatory joint diseases</b>            |                        |                      |                       |                      |                      |                       |                     |                      |                     |                      |                      |                       |                        |
| Rheumatoid arthritis                          | 756 (61.1)             | 160 (78.8)           | 243 (36.5)            | 126 (56.8)           | 26 (7.7)             | 293 (36.4)            | 70 (84.3)           | 87 (45.1)            | 63 (70)             | 2 (1.7)              | 119 (88.8)           | 110 (14.9)            | 1394 (37.4)            |
| Spondyloarthritis                             | 74 (6)                 | 4 (2)                | 6 (0.9)               | 35 (15.8)            | 6 (1.8)              | 271 (33.7)            | 2 (2.4)             | 0                    | 2 (2.2)             | 43 (37.1)            | 4 (3)                | 59 (8)                | 431 (11.6)             |
| Psoriatic arthritis                           | 177 (14.3)             | 23 (11.3)            | 8 (1.2)               | 38 (17.1)            | 1 (0.3)              | 182 (22.6)            | 4 (4.8)             | 1 (0.5)              | 0                   | 70 (60.3)            | 9 (6.7)              | 38 (5.1)              | 440 (11.8)             |
| Total IJD                                     | 1047 (84.6)            | 190 (93.6)           | 280 (42.1)            | 212 (95.5)           | 33 (9.8)             | 765 (95.1)            | 77 (92.8)           | 91 (47.2)            | 68 (75.6)           | 113 (97.4)           | 132 (98.5)           | 239 (32.3)            | 2373 (63.6)            |
| <b>Connective tissue diseases/ Vasculitis</b> |                        |                      |                       |                      |                      |                       |                     |                      |                     |                      |                      |                       |                        |
| SLE                                           | 49 (4)                 | 7 (3.4)              | 257 (38.6)            | 3 (1.4)              | 127 (37.6)           | 6 (0.7)               | 2 (2.4)             | 15 (7.8)             | 1 (1.1)             | 1 (0.9)              | 5 (3.7)              | 48 (6.5)              | 391 (10.5)             |
| CTDs (other than SLE)                         | 104 (8.4)              | 4 (2)                | 171 (25.7)            | 5 (2.3)              | 134 (39.6)           | 19 (2.4)              | 6 (7.2)             | 52 (26.9)            | 1 (1.1)             | 0                    | 3 (2.2)              | 156 (21.1)            | 533 (14.3)             |
| Vasculitis                                    | 44 (3.6)               | 7 (3.4)              | 7 (1.1)               | 5 (2.3)              | 53 (15.7)            | 14 (1.7)              | 0                   | 39 (20.2)            | 21 (23.3)           | 0                    | 0                    | 161 (21.8)            | 326 (8.7)              |
| Total CTD                                     | 190 (15.4)             | 17 (8.4)             | 407 (61.2)            | 13 (5.9)             | 294 (87)             | 39 (4.9)              | 8 (9.6)             | 104 (53.9)           | 23 (25.6)           | 1 (0.9)              | 7 (5.2)              | 353 (47.8)            | 1193 (32)              |
| <b>Other RMDs</b>                             |                        |                      |                       |                      |                      |                       |                     |                      |                     |                      |                      |                       |                        |
| Total                                         | 60 (4.9)               | 7 (3.4)              | 33 (5)                | 17 (7.7)             | 49 (14.5)            | 33 (4.1)              | 3 (3.6)             | 20 (10.4)            | 3 (3.3)             | 3 (2.6)              | 6 (4.5)              | 173 (23.4)            | 356 (9.5)              |
| <b>Disease activity</b>                       |                        |                      |                       |                      |                      |                       |                     |                      |                     |                      |                      |                       |                        |
|                                               | N=894                  | N=162                | N=574                 | N=196                | N=300                | N=547                 | N=62                | N=142                | N=61                | N=73                 | N=105                | N=517                 | N=2758                 |
| Remission                                     | 307 (34.3)             | 40 (24.7)            | 146 (25.4)            | 50 (25.5)            | 66 (22)              | 184 (33.6)            | 14 (22.6)           | 36 (25.4)            | 16 (26.2)           | 20 (27.4)            | 19 (18.1)            | 215 (41.6)            | 893 (32.4)             |
| Minimal/low                                   | 413 (46.2)             | 84 (51.9)            | 310 (54)              | 100 (51)             | 138 (46)             | 265 (48.4)            | 32 (51.6)           | 64 (45.1)            | 25 (41)             | 33 (45.2)            | 56 (53.3)            | 211 (40.8)            | 1309 (47.5)            |
| Moderate DA                                   | 157 (17.6)             | 31 (19.1)            | 91 (15.9)             | 38 (19.4)            | 71 (23.7)            | 89 (16.3)             | 10 (16.1)           | 26 (18.3)            | 16 (26.2)           | 19 (26)              | 26 (24.8)            | 56 (10.8)             | 448 (16.2)             |
| Severe/high DA                                | 17 (1.9)               | 7 (4.3)              | 27 (4.7)              | 8 (4.1)              | 25 (8.3)             | 9 (1.6)               | 6 (9.7)             | 16 (11.3)            | 4 (6.6)             | 1 (1.4)              | 4 (3.8)              | 35 (6.8)              | 108 (3.9)              |

|                           |                        |                       |                       |                       |                       |                       |                     |                       |                     |                      |                      |                       |                         |
|---------------------------|------------------------|-----------------------|-----------------------|-----------------------|-----------------------|-----------------------|---------------------|-----------------------|---------------------|----------------------|----------------------|-----------------------|-------------------------|
| <b>Other outcomes</b>     |                        |                       |                       |                       |                       |                       |                     |                       |                     |                      |                      |                       |                         |
| Hospitalised              | 541 (46.2)<br>(N=1170) | 103 (52.8)<br>(N=195) | 298 (47.1)<br>(N=633) | 126 (62.4)<br>(N=202) | 197 (60.4)<br>(N=326) | 207 (27.3)<br>(N=758) | 33 (42.9)<br>(N=77) | 127 (71.3)<br>(N=178) | 26 (29.9)<br>(N=87) | 37 (34.3)<br>(N=108) | 55 (43.7)<br>(N=126) | 442 (61.7)<br>(N=716) | 1739 (49)<br>(N=3546)   |
| Death                     | 99 (8)                 | 22 (10.8)             | 56 (8.4)              | 42 (18.9)             | 46 (13.6)             | 30 (3.7)              | 9 (10.8)            | 42 (21.8)             | 5 (5.6)             | 1 (0.9)              | 13 (9.7)             | 124 (16.8)            | 390 (10.5)              |
|                           |                        |                       |                       |                       |                       |                       |                     |                       |                     |                      |                      |                       |                         |
| <b>Comorbidities</b>      | N=1224                 | N=202                 | N=661                 | N=219                 | N=337                 | N=800                 | N=83                | N=190                 | N=90                | N=115                | N=133                | N=733                 | N=3700                  |
| Hypertension              | 422 (34.5)             | 71 (35.1)             | 239 (36.2)            | 85 (38.8)             | 127 (37.7)            | 196 (24.5)            | 28 (33.7)           | 58 (30.5)             | 24 (26.7)           | 29 (25.2)            | 55 (41.4)            | 332 (45.3)            | 1307 (35.3)             |
| Cardiovascular disease    | 121 (9.9)              | 23 (11.4)             | 63 (9.5)              | 36 (16.4)             | 38 (11.3)             | 53 (6.6)              | 12 (14.5)           | 25 (13.2)             | 13 (14.4)           | 9 (7.8)              | 12 (9)               | 146 (19.9)            | 442 (11.9)              |
| Cerebrovascular disease   | 31 (2.5)               | 7 (3.5)               | 19 (2.9)              | 9 (4.1)               | 11 (3.3)              | 13 (1.6)              | 1 (1.2)             | 5 (2.6)               | 3 (3.3)             | 2 (1.7)              | 4 (3)                | 31 (4.2)              | 109 (2.9)               |
| Chronic lung disease      | 216 (17.6)             | 48 (23.8)             | 136 (20.6)            | 45 (20.5)             | 113 (33.5)            | 108 (13.5)            | 17 (20.5)           | 64 (33.7)             | 7 (7.8)             | 13 (11.3)            | 34 (25.6)            | 137 (18.7)            | 719 (19.4)              |
| Chronic kidney disease    | 42 (3.4)               | 12 (5.9)              | 58 (8.8)              | 11 (5)                | 54 (16)               | 24 (3)                | 6 (7.2)             | 22 (11.6)             | 3 (3.3)             | 3 (2.6)              | 6 (4.5)              | 83 (11.3)             | 258 (7)                 |
| Obesity (BMI ≥ 30)        | 187 (15.3)             | 30 (14.9)             | 108 (16.3)            | 38 (17.4)             | 55 (16.3)             | 148 (18.5)            | 15 (18.1)           | 22 (11.6)             | 18 (20)             | 27 (23.5)            | 36 (27.1)            | 102 (13.9)            | 597 (16.1)              |
| Morbid obesity (BMI ≥ 40) | 33 (2.7)               | 6 (3)                 | 34 (5.1)              | 6 (2.7)               | 26 (7.7)              | 24 (3)                | 4 (4.8)             | 13 (6.8)              | 2 (2.2)             | 2 (1.7)              | 12 (9)               | 20 (2.7)              | 122 (3.3)               |
| Diabetes                  | 170 (13.9)             | 39 (19.3)             | 80 (12.1)             | 38 (17.4)             | 46 (13.6)             | 75 (9.4)              | 14 (16.9)           | 26 (13.7)             | 13 (14.4)           | 12 (10.4)            | 19 (14.3)            | 121 (16.5)            | 505 (13.6)              |
| Cancer                    | 64 (5.2)               | 7 (3.5)               | 32 (4.8)              | 12 (5.5)              | 13 (3.9)              | 17 (2.1)              | 5 (6)               | 18 (9.5)              | 3 (3.3)             | 5 (4.3)              | 2 (1.5)              | 76 (10.4)             | 214 (5.8)               |
| Other comorbidities       | 267 (21.8)             | 43 (21.3)             | 138 (20.9)            | 63 (28.8)             | 98 (29.1)             | 209 (26.1)            | 19 (22.9)           | 50 (26.3)             | 22 (24.4)           | 44 (38.3)            | 33 (24.8)            | 178 (24.3)            | 897 (24.2)              |
|                           |                        |                       |                       |                       |                       |                       |                     |                       |                     |                      |                      |                       |                         |
| <b>DMARD therapies</b>    |                        |                       |                       |                       |                       |                       |                     |                       |                     |                      |                      |                       |                         |
| Methotrexate/Leflunomide  | 1237 (100)             | 203 (100)             | 199 (29.9)            | 96 (43.2)             | 10 (3)                | 306 (38.1)            | 41 (49.4)           | 61 (31.6)             | 32 (35.6)           | 30 (25.9)            | 61 (45.5)            | 0                     | 1404 (37.7)             |
| Sulfasalazine             | 75 (6.1)               | 24 (11.8)             | 39 (5.9)              | 222 (100)             | 5 (1.5)               | 48 (6)                | 1 (1.2)             | 6 (3.1)               | 5 (5.6)             | 3 (2.6)              | 11 (8.2)             | 0                     | 222 (6)                 |
| Antimalarials             | 177 (14.3)             | 33 (16.3)             | 665 (100)             | 39 (17.6)             | 108 (32)              | 41 (5.1)              | 10 (12)             | 29 (15)               | 7 (7.8)             | 2 (1.7)              | 14 (10.4)            | 0                     | 665 (17.8)              |
| Immunosuppressants        | 9 (0.7)                | 1 (0.5)               | 108 (16.2)            | 5 (2.3)               | 338 (100)             | 17 (2.1)              | 2 (2.4)             | 27 (14)               | 0                   | 1 (0.9)              | 2 (1.5)              | 0                     | 338 (9.1)               |
| bDMARDs                   | 424 (34.3)             | 63 (31)               | 109 (16.4)            | 64 (28.8)             | 59 (17.5)             | 804 (100)             | 83 (100)            | 193 (100)             | 90 (100)            | 116 (100)            | 1 (0.7)              | 0                     | 1331 (35.7)             |
| tsDMARDs                  | 52 (4.2)               | 12 (5.9)              | 14 (2.1)              | 12 (5.4)              | 3 (0.9)               | 0                     | 0                   | 1 (0.5)               | 0                   | 1 (0.9)              | 134 (100)            | 0                     | 147 (3.9)               |
|                           |                        |                       |                       |                       |                       |                       |                     |                       |                     |                      |                      |                       |                         |
| <b>Further therapies</b>  |                        |                       |                       |                       |                       |                       |                     |                       |                     |                      |                      |                       |                         |
| Glucocorticoids (#)       | 410 (33.5)<br>(N=1223) | 83 (42.3)<br>(N=196)  | 252 (38.3)<br>(N=658) | 66 (30.6)<br>(N=216)  | 66 (30.6)<br>(N=335)  | 130 (16.3)<br>(N=796) | 34 (41)<br>(N=83)   | 100 (52.6)<br>(N=190) | 35 (38.9)<br>(N=90) | 16 (13.8)<br>(N=116) | 48 (36.9)<br>(N=130) | 290 (39.8)<br>(N=729) | 1273 (34.6)<br>(N=3682) |
| 0 mg/d < GC ≤ 10mg/d      | 351 (29.2)<br>(N=1203) | 75 (38.9)<br>(N=193)  | 192 (30)<br>(N=640)   | 52 (24.4)<br>(N=213)  | 52 (24.4)<br>(N=323)  | 102 (12.9)<br>(N=789) | 30 (36.6)<br>(N=82) | 67 (37)<br>(N=181)    | 30 (33.7)<br>(N=89) | 14 (12.1)<br>(N=116) | 44 (33.8)<br>(N=130) | 202 (28.4)<br>(N=712) | 983 (27.2)<br>(N=3617)  |
| GC > 10 mg/d              | 38 (3.2)<br>(N=1203)   | 5 (2.6)<br>(N=193)    | 42 (6.6)<br>(N=640)   | 11 (5.2)<br>(N=213)   | 11 (5.2)<br>(N=323)   | 20 (2.5)<br>(N=789)   | 3 (3.7)<br>(N=82)   | 22 (12.2)<br>(N=181)  | 4 (4.5)<br>(N=89)   | 2 (1.7)<br>(N=116)   | 4 (3.1)<br>(N=130)   | 70 (9.8)<br>(N=712)   | 220 (6.1)<br>(N=3617)   |

---

|  |  |  |  |  |  |  |  |  |  |  |  |  |  |
|--|--|--|--|--|--|--|--|--|--|--|--|--|--|
|  |  |  |  |  |  |  |  |  |  |  |  |  |  |
|--|--|--|--|--|--|--|--|--|--|--|--|--|--|

---

Data are N (column %) for categorical variables or mean (SD) for continuous variables. Table includes all patients with a non-missing outcome and non-missing values for age, sex and disease modifying anti-rheumatic drugs (DMARDs) (101 patients excluded). Data refers to patients with non-missing values for the respective variable, total N for patients with non-missing values is given in parentheses for variables with missing values. (\*) Includes one patient on a study medication (Lenabasum). (#) Includes patients with a missing glucocorticoid dose.

ABA, Abatacept; bDMARD, biologic disease modifying antirheumatic drugs; BMI, body mass index; csDMARD, conventional synthetic disease modifying antirheumatic drugs; combi, combination therapy; CTD, connective tissue diseases; DA, disease activity; DMARD, disease modifying antirheumatic drugs; GC, glucocorticoids; IL-6i, interleukin-6 inhibitors; IL-17/23/12+23i, interleukin-17/23/12+23 inhibitors; IMMUNOSUPPR, immunosuppressants; JAKi, Janus kinase inhibitors; JIA, juvenile idiopathic arthritis; LEF, leflunomide; MTX, methotrexate; mono, monotherapy; N, number; NSAID, non-steroidal anti-inflammatory drugs; RTX, rituximab; SLE, systemic lupus erythematosus; SSZ, sulfasalazine; TNFi, tumour necrosis factor inhibitors.

---

| Supplementary table 4. Multivariable logistic regression analysis of factors associated with COVID-19-related death in patients with rheumatic diseases (excluding patients reported from France) |                    |             |             |             |                                                  |             |             |              |                                         |             |             |              |                                                               |             |             |             |
|---------------------------------------------------------------------------------------------------------------------------------------------------------------------------------------------------|--------------------|-------------|-------------|-------------|--------------------------------------------------|-------------|-------------|--------------|-----------------------------------------|-------------|-------------|--------------|---------------------------------------------------------------|-------------|-------------|-------------|
|                                                                                                                                                                                                   | All                |             |             |             | Patients with inflammatory joint diseases (IJDs) |             |             |              | Only patients with rheumatoid arthritis |             |             |              | Patients with connective tissue diseases (CTDs) or vasculitis |             |             |             |
| N deaths/patients (%)                                                                                                                                                                             | 324 / 2921 (11.1%) |             |             |             | 186 / 1818 (10.2%)                               |             |             |              | 146 / 1124 (13.0 %)                     |             |             |              | 113 / 932 (12.1%)                                             |             |             |             |
|                                                                                                                                                                                                   | N deaths/patients  | OR          | 95% CI      |             | N deaths/patients                                | OR          | 95% CI      |              | N deaths/patients                       | OR          | 95% CI      |              | N deaths/patients                                             | OR          | 95% CI      |             |
| Age, years                                                                                                                                                                                        |                    |             |             |             |                                                  |             |             |              |                                         |             |             |              |                                                               |             |             |             |
| Age ≤ 65                                                                                                                                                                                          | 108 / 2018         | 1           | [Reference] |             | 52 / 1259                                        | 1           | [Reference] |              | 38 / 692                                | 1           | [Reference] |              | 49 / 657                                                      | 1           | [Reference] |             |
| 65 years < Age ≤ 75                                                                                                                                                                               | 97 / 516           | <b>3.18</b> | <b>2.26</b> | <b>4.47</b> | 67 / 351                                         | <b>3.58</b> | <b>2.41</b> | <b>5.33</b>  | 53 / 259                                | <b>3.33</b> | <b>1.80</b> | <b>6.18</b>  | 24 / 139                                                      | <b>2.43</b> | <b>1.43</b> | <b>4.13</b> |
| Age > 75                                                                                                                                                                                          | 119 / 387          | <b>5.77</b> | <b>4.03</b> | <b>8.28</b> | 67 / 208                                         | <b>7.22</b> | <b>4.89</b> | <b>10.66</b> | 55 / 173                                | <b>6.31</b> | <b>3.77</b> | <b>10.54</b> | 40 / 136                                                      | <b>4.34</b> | <b>2.11</b> | <b>8.91</b> |
| Male sex (vs. female)                                                                                                                                                                             | 131 / 919          | 1.39        | 1.00        | 1.95        | 74 / 603                                         | <b>1.39</b> | <b>1.01</b> | <b>1.91</b>  | 50 / 279                                | 1.27        | 0.85        | 1.89         | 44 / 232                                                      | 1.38        | 0.91        | 2.08        |
| Ever smoked (vs. never)                                                                                                                                                                           | 135 / 873          | 1.12        | 0.85        | 1.49        | 85 / 576                                         | 1.15        | 0.79        | 1.67         | 71 / 373                                | 1.27        | 0.87        | 1.86         | 39 / 234                                                      | 1.13        | 0.70        | 1.82        |
| Comorbidities                                                                                                                                                                                     |                    |             |             |             |                                                  |             |             |              |                                         |             |             |              |                                                               |             |             |             |
| Hypertension alone or CVD alone                                                                                                                                                                   | 125 / 954          | 1.08        | 0.85        | 1.38        | 67 / 568                                         | 1.03        | 0.69        | 1.54         | 54 / 375                                | 1.05        | 0.70        | 1.59         | 53 / 337                                                      | 1.40        | 0.95        | 2.08        |
| Hypertension and CVD                                                                                                                                                                              | 72 / 253           | <b>1.77</b> | <b>1.20</b> | <b>2.62</b> | 48 / 146                                         | <b>2.45</b> | <b>1.22</b> | <b>4.92</b>  | 34 / 102                                | 2.09        | 0.99        | 4.42         | 18 / 82                                                       | 1.15        | 0.61        | 2.18        |
| Chronic lung disease                                                                                                                                                                              | 122 / 610          | <b>1.74</b> | <b>1.26</b> | <b>2.40</b> | 73 / 342                                         | <b>1.67</b> | <b>1.15</b> | <b>2.41</b>  | 61 / 258                                | <b>1.62</b> | <b>1.13</b> | <b>2.32</b>  | 44 / 241                                                      | <b>2.17</b> | <b>1.41</b> | <b>3.35</b> |
| Chronic kidney disease                                                                                                                                                                            | 58 / 214           | 1.40        | 0.81        | 2.43        | 21 / 97                                          | 0.83        | 0.45        | 1.56         | 16 / 75                                 | 0.76        | 0.36        | 1.59         | 30 / 97                                                       | <b>2.34</b> | <b>1.16</b> | <b>4.73</b> |
| Diabetes mellitus                                                                                                                                                                                 | 79 / 433           | 1.26        | 0.76        | 2.08        | 47 / 267                                         | 1.23        | 0.86        | 1.77         | 32 / 182                                | 1.00        | 0.63        | 1.58         | 21 / 126                                                      | 1.01        | 0.52        | 1.96        |
| Rheumatic disease                                                                                                                                                                                 |                    |             |             |             |                                                  |             |             |              |                                         |             |             |              |                                                               |             |             |             |
| Rheumatoid arthritis                                                                                                                                                                              | 140 / 1079         | 1           | [Reference] |             | 146 / 1126                                       | 1           | [Reference] |              |                                         |             |             |              |                                                               | n.a.        |             |             |
| Systemic lupus erythematosus                                                                                                                                                                      | 34 / 341           | 1.28        | 0.71        | 2.29        |                                                  |             |             |              |                                         |             |             |              | 30 / 328                                                      | 1           | [Reference] |             |
| Vasculitis                                                                                                                                                                                        | 49 / 254           | 0.75        | 0.54        | 1.05        |                                                  |             |             |              |                                         |             |             |              | 43 / 233                                                      | 0.65        | 0.40        | 1.08        |
| Other connective tissue diseases                                                                                                                                                                  | 42 / 384           | <b>0.73</b> | <b>0.54</b> | <b>0.98</b> |                                                  |             |             |              |                                         |             |             |              | 40 / 371                                                      | 0.77        | 0.36        | 1.64        |

|                                                                 |          |             |             |             |          |             |             |              |          |             |             |             |          |             |             |             |  |      |
|-----------------------------------------------------------------|----------|-------------|-------------|-------------|----------|-------------|-------------|--------------|----------|-------------|-------------|-------------|----------|-------------|-------------|-------------|--|------|
| Psoriasis arthritis                                             | 16 / 355 | 0.72        | 0.49        | 1.05        | 16 / 363 | 0.75        | 0.50        | 1.13         |          |             |             |             |          |             |             |             |  |      |
| Spondyloarthritis                                               | 14 / 231 | 0.96        | 0.50        | 1.87        | 14 / 232 | 1.02        | 0.52        | 2.00         |          |             |             |             |          |             |             |             |  |      |
| Other inflammatory arthritis or non-systemic JIA                | 9 / 92   | 0.75        | 0.45        | 1.26        | 10 / 97  | 0.71        | 0.41        | 1.23         |          |             |             |             |          |             |             |             |  | n.a. |
| Other rheumatic diseases (not IJDs / CTDs / vasculitis)         | 20 / 185 | <b>0.53</b> | <b>0.36</b> | <b>0.80</b> |          | n.a.        |             |              |          |             |             |             |          |             |             |             |  |      |
| High/moderate/severe disease activity (DA) vs. remission/low DA | 96 / 585 | <b>1.91</b> | <b>1.24</b> | <b>2.95</b> | 50 / 365 | <b>1.65</b> | <b>1.11</b> | <b>2.45</b>  | 40 / 233 | 1.67        | 1.00        | 2.81        | 43 / 189 | <b>2.59</b> | <b>1.46</b> | <b>4.58</b> |  |      |
| Medication                                                      |          |             |             |             |          |             |             |              |          |             |             |             |          |             |             |             |  |      |
| Methotrexate                                                    | 38 / 444 | 1           | [Reference] |             | 33 / 366 | 1           | [Reference] |              | 27 / 273 | 1           | [Reference] |             | 5 / 69   | 1           | [Reference] |             |  |      |
| No DMARD therapy                                                | 94 / 578 | <b>1.91</b> | <b>1.29</b> | <b>2.84</b> | 30 / 188 | <b>1.99</b> | <b>1.18</b> | <b>3.36</b>  | 19 / 90  | <b>2.01</b> | <b>1.16</b> | <b>3.49</b> | 49 / 266 | <b>2.76</b> | <b>1.32</b> | <b>5.78</b> |  |      |
| Leflunomide                                                     | 12 / 82  | 1.53        | 0.83        | 2.81        | 10 / 75  | 1.40        | 0.65        | 3.01         | 9 / 62   | 1.46        | 0.68        | 3.15        |          |             |             |             |  | n.a. |
| Antimalarials                                                   | 26 / 380 | 0.92        | 0.58        | 1.46        | 17 / 158 | 1.15        | 0.61        | 2.14         | 17 / 133 | 1.28        | 0.68        | 2.41        | 10 / 234 | 1.16        | 0.33        | 4.03        |  |      |
| Sulfasalazine                                                   | 33 / 138 | <b>3.19</b> | <b>1.39</b> | <b>7.32</b> | 31 / 132 | <b>3.10</b> | <b>1.25</b> | <b>7.70</b>  | 21 / 84  | <b>2.41</b> | <b>1.07</b> | <b>5.39</b> |          |             |             |             |  | n.a. |
| Immunosuppressants                                              | 36 / 252 | <b>1.98</b> | <b>1.20</b> | <b>3.24</b> |          | n.a.        |             |              |          | n.a.        |             |             | 30 / 227 | 1.87        | 0.75        | 4.65        |  |      |
| TNF inhibitors                                                  | 26 / 574 | 0.76        | 0.45        | 1.28        | 23 / 544 | 0.73        | 0.36        | 1.46         | 15 / 235 | 0.85        | 0.37        | 1.96        | 3 / 34   | 1.22        | 0.19        | 7.68        |  |      |
| Abatacept                                                       | 8 / 62   | 1.22        | 0.55        | 2.68        | 8 / 57   | 1.43        | 0.60        | 3.45         | 8 / 51   | 1.57        | 0.64        | 3.85        |          |             |             |             |  | n.a. |
| Rituximab                                                       | 32 / 146 | <b>3.56</b> | <b>1.94</b> | <b>6.53</b> | 19 / 73  | <b>4.75</b> | <b>2.21</b> | <b>10.20</b> | 18 / 69  | <b>4.35</b> | <b>1.91</b> | <b>9.91</b> | 15 / 78  | 2.60        | 0.80        | 8.44        |  |      |
| Belimumab                                                       | 1 / 25   | 0.62        | 0.15        | 2.53        |          | n.a.        |             |              |          | n.a.        |             |             | 1 / 25   | 0.80        | 0.15        | 4.33        |  |      |
| IL-6 inhibitors                                                 | 4 / 61   | 0.94        | 0.36        | 2.43        | 1 / 49   | 0.33        | 0.03        | 3.39         | 1 / 44   | 0.33        | 0.03        | 3.25        |          |             |             |             |  | n.a. |
| IL-17/IL-23/IL-12+23 inhibitors                                 | 1 / 77   | 0.29        | 0.03        | 2.41        | 1 / 75   | 0.31        | 0.04        | 2.43         |          | n.a.        |             |             |          |             |             |             |  |      |
| tsDMARDs                                                        | 13 / 120 | 1.50        | 0.81        | 2.77        | 13 / 117 | 1.77        | 0.97        | 3.23         | 11 / 97  | 1.54        | 0.71        | 3.32        |          |             |             |             |  | n.a. |
| Glucocorticoids (GCs)                                           |          |             |             |             |          |             |             |              |          |             |             |             |          |             |             |             |  |      |

|               |            |             |             |             |            |      |             |      |          |      |             |      |          |             |             |             |
|---------------|------------|-------------|-------------|-------------|------------|------|-------------|------|----------|------|-------------|------|----------|-------------|-------------|-------------|
| No GCs        | 148 / 1885 | 1           | [Reference] |             | 103 / 1301 | 1    | [Reference] |      | 76 / 700 | 1    | [Reference] |      | 31 / 465 | 1           | [Reference] |             |
| GCs 1-10mg/d  | 137 / 856  | 1.33        | 0.85        | 2.07        | 75 / 467   | 1.18 | 0.61        | 2.28 | 63 / 390 | 1.10 | 0.51        | 2.38 | 57 / 372 | <b>1.92</b> | <b>1.21</b> | <b>3.03</b> |
| GCs > 10 mg/d | 40 / 180   | <b>1.73</b> | <b>1.10</b> | <b>2.71</b> | 9 / 50     | 1.07 | 0.48        | 2.36 | 7 / 34   | 0.97 | 0.42        | 2.22 | 28 / 111 | <b>2.40</b> | <b>1.32</b> | <b>4.38</b> |

Missing values imputed via multiple imputation, patient numbers may thus be rounded. Effects significant at level  $\alpha=0.05$  are marked in bold. Patients were excluded from a particular analysis if the medication they received provided  $\leq 20$  patients for that analysis or if there were no deaths reported for that specific medication.

CI, confidence interval; CTD, connective tissue diseases; CVD, cardiovascular disease; DA, disease activity; DMARD, disease modifying antirheumatic drugs; GC, glucocorticoids; IJD, inflammatory joint diseases; IL, interleukin; JIA, juvenile idiopathic arthritis; N, number; OR, odds ratio; SLE, systemic lupus erythematosus; TNF, tumour necrosis factor; tsDMARD, targeted synthetic disease modifying antirheumatic drugs.

| Supplementary table 5. Multivariable logistic regression analysis of factors associated with COVID-19-related death in patients with rheumatic diseases in patients with no missing values (complete case analysis) |                   |             |             |             |                                                  |             |             |              |                                         |             |             |              |                                                               |             |             |              |
|---------------------------------------------------------------------------------------------------------------------------------------------------------------------------------------------------------------------|-------------------|-------------|-------------|-------------|--------------------------------------------------|-------------|-------------|--------------|-----------------------------------------|-------------|-------------|--------------|---------------------------------------------------------------|-------------|-------------|--------------|
|                                                                                                                                                                                                                     | All               |             |             |             | Patients with inflammatory joint diseases (IJDs) |             |             |              | Only patients with rheumatoid arthritis |             |             |              | Patients with connective tissue diseases (CTDs) or vasculitis |             |             |              |
| N deaths/patients (%)                                                                                                                                                                                               | 207 / 2081 (9.9%) |             |             |             | 113 / 1232 (9.1%)                                |             |             |              | 87 / 770 (11.3%)                        |             |             |              | 74 / 699 (10.6%)                                              |             |             |              |
|                                                                                                                                                                                                                     | N deaths/patients | OR          | 95% CI      |             | N deaths/patients                                | OR          | 95% CI      |              | N deaths/patients                       | OR          | 95% CI      |              | N deaths/patients                                             | OR          | 95% CI      |              |
| Age, years                                                                                                                                                                                                          |                   |             |             |             |                                                  |             |             |              |                                         |             |             |              |                                                               |             |             |              |
| Age ≤ 65                                                                                                                                                                                                            | 69 / 1476         | 1           | [Reference] |             | 33 / 868                                         | 1           | [Reference] |              | 24 / 493                                | 1           | [Reference] |              | 33 / 518                                                      | 1           | [Reference] |              |
| 65 years < Age ≤ 75                                                                                                                                                                                                 | 58 / 357          | <b>3.03</b> | <b>1.99</b> | <b>4.62</b> | 37 / 236                                         | <b>2.81</b> | <b>1.78</b> | <b>4.44</b>  | 28 / 172                                | <b>2.52</b> | <b>1.31</b> | <b>4.85</b>  | 15 / 100                                                      | <b>2.12</b> | <b>1.06</b> | <b>4.26</b>  |
| Age > 75                                                                                                                                                                                                            | 80 / 248          | <b>6.71</b> | <b>4.91</b> | <b>9.17</b> | 43 / 128                                         | <b>7.17</b> | <b>3.65</b> | <b>14.09</b> | 35 / 105                                | <b>5.93</b> | <b>2.47</b> | <b>14.22</b> | 26 / 81                                                       | <b>5.60</b> | <b>2.89</b> | <b>10.86</b> |
| Male sex (vs. female)                                                                                                                                                                                               | 81 / 614          | 1.30        | 0.96        | 1.76        | 45 / 385                                         | <b>1.57</b> | <b>1.05</b> | <b>2.35</b>  | 29 / 175                                | 1.35        | 0.79        | 2.32         | 26 / 163                                                      | 1.07        | 0.65        | 1.75         |
| Ever smoked (vs. never)                                                                                                                                                                                             | 85 / 597          | 1.16        | 0.84        | 1.60        | 50 / 377                                         | 1.20        | 0.80        | 1.80         | 42 / 247                                | <b>1.44</b> | <b>1.02</b> | <b>2.03</b>  | 27 / 172                                                      | 1.35        | 0.69        | 2.63         |
| Comorbidities                                                                                                                                                                                                       |                   |             |             |             |                                                  |             |             |              |                                         |             |             |              |                                                               |             |             |              |
| Hypertension alone or CVD alone                                                                                                                                                                                     | 82 / 687          | 1.14        | 0.93        | 1.41        | 41 / 387                                         | 1.11        | 0.74        | 1.66         | 33 / 258                                | 1.17        | 0.76        | 1.82         | 37 / 260                                                      | <b>1.67</b> | <b>1.09</b> | <b>2.55</b>  |
| Hypertension and CVD                                                                                                                                                                                                | 48 / 168          | <b>2.04</b> | <b>1.58</b> | <b>2.63</b> | 34 / 97                                          | <b>3.24</b> | <b>1.73</b> | <b>6.08</b>  | 24 / 67                                 | <b>3.05</b> | <b>1.33</b> | <b>6.96</b>  | 10 / 53                                                       | 1.06        | 0.61        | 1.84         |
| Chronic lung disease                                                                                                                                                                                                | 83 / 453          | <b>1.76</b> | <b>1.37</b> | <b>2.27</b> | 42 / 232                                         | <b>1.39</b> | <b>1.02</b> | <b>1.90</b>  | 34 / 175                                | 1.32        | 0.95        | 1.83         | 37 / 194                                                      | <b>2.80</b> | <b>1.88</b> | <b>4.16</b>  |
| Chronic kidney disease                                                                                                                                                                                              | 38 / 135          | 1.59        | 0.94        | 2.69        | 17 / 55                                          | 1.49        | 0.97        | 2.31         | 13 / 42                                 | <b>1.53</b> | <b>1.03</b> | <b>2.29</b>  | 16 / 61                                                       | 2.04        | 0.77        | 5.41         |
| Diabetes mellitus                                                                                                                                                                                                   | 48 / 302          | 1.13        | 0.73        | 1.73        | 32 / 185                                         | 1.24        | 0.91        | 1.69         | 21 / 125                                | 0.88        | 0.59        | 1.30         | 10 / 89                                                       | 0.69        | 0.28        | 1.70         |
| Rheumatic disease                                                                                                                                                                                                   |                   |             |             |             |                                                  |             |             |              |                                         |             |             |              |                                                               |             |             |              |
| Rheumatoid arthritis                                                                                                                                                                                                | 84 / 772          | 1           | [Reference] |             | 87 / 770                                         | 1           | [Reference] |              |                                         |             |             |              |                                                               |             | n.a.        |              |
| Systemic lupus erythematosus                                                                                                                                                                                        | 19 / 265          | 0.99        | 0.409       | 2.37        |                                                  |             | n.a.        |              |                                         |             | n.a.        |              | 16 / 256                                                      | 1           | [Reference] |              |

|                                                                 |          |             |             |             |          |             |             |             |          |             |             |             |          |             |             |              |
|-----------------------------------------------------------------|----------|-------------|-------------|-------------|----------|-------------|-------------|-------------|----------|-------------|-------------|-------------|----------|-------------|-------------|--------------|
| Vasculitis                                                      | 31 / 163 | 1.02        | 0.59        | 1.77        |          |             |             |             |          |             |             |             | 26 / 146 | 1.03        | 0.49        | 2.20         |
| Other connective tissue diseases                                | 33 / 307 | 0.88        | 0.55        | 1.43        |          |             |             |             |          |             |             |             | 32 / 297 | 1.14        | 0.55        | 2.39         |
| Psoriasis arthritis                                             | 11 / 230 | 0.80        | 0.53        | 1.20        | 11 / 236 | 0.69        | 0.45        | 1.06        |          |             |             |             |          | n.a.        |             |              |
| Spondyloarthritis                                               | 9 / 157  | 1.11        | 0.56        | 2.18        | 9 / 156  | 1.06        | 0.52        | 2.13        |          |             |             |             |          |             |             |              |
| Other inflammatory arthritis or non-systemic JIA                | 5 / 68   | 0.87        | 0.42        | 1.81        | 6 / 70   | 0.79        | 0.41        | 1.55        |          |             |             |             |          |             |             |              |
| Other rheumatic diseases (not IJDs / CTDs / vasculitis)         | 15 / 119 | 0.70        | 0.39        | 1.26        |          | n.a.        |             |             |          |             |             |             |          |             |             |              |
| High/moderate/severe disease activity (DA) vs. remission/low DA | 65 / 422 | <b>2.03</b> | <b>1.33</b> | <b>3.10</b> | 34 / 240 | <b>1.96</b> | <b>1.24</b> | <b>3.09</b> | 27 / 159 | <b>1.98</b> | <b>1.13</b> | <b>3.48</b> | 28 / 145 | <b>2.73</b> | <b>1.93</b> | <b>3.86</b>  |
| Medication                                                      |          |             |             |             |          |             |             |             |          |             |             |             |          |             |             |              |
| Methotrexate                                                    | 24 / 302 | 1           | [Reference] |             | 22 / 252 | 1           | [Reference] |             | 17 / 182 | 1           | [Reference] |             | 2 / 46   | 1           | [Reference] |              |
| No DMARD therapy                                                | 58 / 385 | <b>1.56</b> | <b>1.09</b> | <b>2.23</b> | 17 / 122 | 1.54        | 0.90        | 2.62        | 11 / 54  | 1.64        | 0.81        | 3.32        | 30 / 184 | <b>4.23</b> | <b>1.55</b> | <b>11.53</b> |
| Leflunomide                                                     | 7 / 51   | 1.35        | 0.76        | 2.41        | 5 / 47   | 0.87        | 0.48        | 1.60        | 4 / 41   | 0.76        | 0.41        | 1.40        |          | n.a.        |             |              |
| Antimalarials                                                   | 19 / 296 | 1.02        | 0.67        | 1.54        | 12 / 117 | 1.00        | 0.56        | 1.79        | 12 / 96  | 1.09        | 0.59        | 2.05        | 8 / 190  | 2.40        | 0.73        | 7.93         |
| Sulfasalazine                                                   | 16 / 90  | 2.77        | 0.88        | 8.69        | 15 / 87  | 2.43        | 0.78        | 7.53        | 11 / 51  | 2.16        | 0.72        | 6.46        |          | n.a.        |             |              |
| Immunosuppressants                                              | 26 / 193 | <b>1.99</b> | <b>1.08</b> | <b>3.68</b> |          | n.a.        |             |             |          | n.a.        |             |             | 21 / 173 | <b>3.25</b> | <b>1.18</b> | <b>9.00</b>  |
| TNF inhibitors                                                  | 19 / 447 | 0.75        | 0.43        | 1.31        | 17 / 425 | 0.65        | 0.33        | 1.29        | 10 / 188 | 0.68        | 0.24        | 1.94        | 2 / 24   | 2.26        | 0.12        | 42.16        |
| Abatacept                                                       | 6 / 49   | 1.17        | 0.43        | 3.19        | 6 / 46   | 1.12        | 0.35        | 3.61        | 6 / 40   | 1.21        | 0.35        | 4.20        |          | n.a.        |             |              |
| Rituximab                                                       | 17 / 104 | <b>2.43</b> | <b>1.64</b> | <b>3.58</b> | 8 / 45   | <b>2.99</b> | <b>1.36</b> | <b>6.55</b> | 7 / 42   | <b>2.60</b> | <b>1.16</b> | <b>5.81</b> | 10 / 62  | <b>3.48</b> | <b>1.23</b> | <b>9.88</b>  |
| Belimumab                                                       | 1 / 21   | 0.95        | 0.26        | 3.52        |          | n.a.        |             |             |          | n.a.        |             |             | 1 / 21   | 2.11        | 0.32        | 13.96        |
| IL-6 inhibitors                                                 | 3 / 50   | 0.78        | 0.338       | 1.81        |          | n.a.        |             |             |          | n.a.        |             |             |          | n.a.        |             |              |
| tsDMARDs                                                        | 11 / 101 | 1.58        | 0.86        | 2.90        | 11 / 98  | <b>1.76</b> | <b>1.01</b> | <b>3.05</b> | 9 / 83   | 1.41        | 0.74        | 2.70        |          |             |             |              |



| Glucocorticoids (GCs)                                                                                                                                                                                                                                                                                                                                                                                                                |           |             |             |             |          |          |      |             |          |      |          |      |             |             |             |             |   |             |
|--------------------------------------------------------------------------------------------------------------------------------------------------------------------------------------------------------------------------------------------------------------------------------------------------------------------------------------------------------------------------------------------------------------------------------------|-----------|-------------|-------------|-------------|----------|----------|------|-------------|----------|------|----------|------|-------------|-------------|-------------|-------------|---|-------------|
| No GCs                                                                                                                                                                                                                                                                                                                                                                                                                               | 93 / 1394 | 1           | [Reference] |             |          | 59 / 917 | 1    | [Reference] |          |      | 41 / 511 | 1    | [Reference] |             |             | 22 / 373    | 1 | [Reference] |
| GCs 1-10mg/d                                                                                                                                                                                                                                                                                                                                                                                                                         | 90 / 561  | <b>1.63</b> | <b>1.14</b> | <b>2.33</b> | 47 / 282 | 1.44     | 0.66 | 3.15        | 41 / 237 | 1.54 | 0.63     | 3.77 | 37 / 248    | <b>2.32</b> | <b>1.30</b> | <b>4.11</b> |   |             |
| GCs > 10 mg/d                                                                                                                                                                                                                                                                                                                                                                                                                        | 24 / 126  | 1.58        | 0.91        | 2.74        | 7 / 33   | 1.54     | 0.48 | 4.98        | 5 / 22   | 1.35 | 0.48     | 3.80 | 15 / 78     | <b>2.06</b> | <b>1.04</b> | <b>4.09</b> |   |             |
| Effects significant at level $\alpha=0.05$ are marked in bold. Patients were excluded from a particular analysis if the medication they received provided $\leq 20$ patients for that analysis or if there were no deaths reported for that specific medication.                                                                                                                                                                     |           |             |             |             |          |          |      |             |          |      |          |      |             |             |             |             |   |             |
| CI, confidence interval; CTD, connective tissue diseases; CVD, cardiovascular disease; DA, disease activity; DMARD, disease modifying antirheumatic drugs; GC, glucocorticoids; IJD, inflammatory joint diseases; IL, interleukin; JIA, juvenile idiopathic arthritis; N, number; OR, odds ratio; SLE, systemic lupus erythematosus; TNF, tumour necrosis factor; tsDMARD, targeted synthetic disease modifying antirheumatic drugs. |           |             |             |             |          |          |      |             |          |      |          |      |             |             |             |             |   |             |

| Supplementary table 6. Multivariable logistic regression analysis of factors associated with COVID-19-related death in patients with rheumatic diseases with a confirmed or highly likely COVID-19 diagnosis |                    |             |             |             |                                                  |             |             |              |                                         |             |             |             |                                                               |             |             |             |
|--------------------------------------------------------------------------------------------------------------------------------------------------------------------------------------------------------------|--------------------|-------------|-------------|-------------|--------------------------------------------------|-------------|-------------|--------------|-----------------------------------------|-------------|-------------|-------------|---------------------------------------------------------------|-------------|-------------|-------------|
|                                                                                                                                                                                                              | All                |             |             |             | Patients with inflammatory joint diseases (IJDs) |             |             |              | Only patients with rheumatoid arthritis |             |             |             | Patients with connective tissue diseases (CTDs) or vasculitis |             |             |             |
| N deaths/patients (%)                                                                                                                                                                                        | 345 / 2968 (11.6%) |             |             |             | 184 / 1619 (10.2%)                               |             |             |              | 143 / 946 (13.1%)                       |             |             |             | 139 / 999 (13.9%)                                             |             |             |             |
|                                                                                                                                                                                                              | N deaths/patients  | OR          | 95% CI      |             | N deaths/patients                                | OR          | 95% CI      |              | N deaths/patients                       | OR          | 95% CI      |             | N deaths/patients                                             | OR          | 95% CI      |             |
| Age, years                                                                                                                                                                                                   |                    |             |             |             |                                                  |             |             |              |                                         |             |             |             |                                                               |             |             |             |
| Age ≤ 65                                                                                                                                                                                                     | 107 / 1971         | 1           | [Reference] |             | 48 / 1204                                        | 1           | [Reference] |              | 35 / 627                                | 1           | [Reference] |             | 53 / 666                                                      | 1           | [Reference] |             |
| 65 years < Age ≤ 75                                                                                                                                                                                          | 98 / 545           | <b>2.87</b> | <b>1.92</b> | <b>4.29</b> | 62 / 358                                         | <b>3.43</b> | <b>2.43</b> | <b>4.84</b>  | 48 / 267                                | <b>2.90</b> | <b>1.61</b> | <b>5.23</b> | 32 / 161                                                      | <b>2.37</b> | <b>1.27</b> | <b>4.43</b> |
| Age > 75                                                                                                                                                                                                     | 140 / 452          | <b>5.40</b> | <b>3.58</b> | <b>8.14</b> | 74 / 241                                         | <b>7.16</b> | <b>4.81</b> | <b>10.66</b> | 60 / 195                                | <b>5.91</b> | <b>3.76</b> | <b>9.29</b> | 54 / 172                                                      | <b>3.82</b> | <b>1.80</b> | <b>8.12</b> |
| Male sex (vs. female)                                                                                                                                                                                        | 146 / 962          | <b>1.47</b> | <b>1.12</b> | <b>1.94</b> | 71 / 607                                         | 1.27        | 0.90        | 1.81         | 47 / 282                                | 1.16        | 0.76        | 1.75        | 60 / 261                                                      | 1.70        | 0.99        | 2.93        |
| Ever smoked (vs. never)                                                                                                                                                                                      | 119 / 740          | 1.13        | 0.85        | 1.50        | 69 / 468                                         | 1.20        | 0.85        | 1.70         | 58 / 310                                | 1.33        | 0.98        | 1.79        | 39 / 213                                                      | 0.99        | 0.64        | 1.52        |
| Comorbidities                                                                                                                                                                                                |                    |             |             |             |                                                  |             |             |              |                                         |             |             |             |                                                               |             |             |             |
| Hypertension alone or CVD alone                                                                                                                                                                              | 138 / 962          | 1.16        | 0.87        | 1.54        | 67 / 553                                         | 1.00        | 0.72        | 1.37         | 55 / 369                                | 1.09        | 0.74        | 1.62        | 63 / 357                                                      | 1.45        | 0.96        | 2.19        |
| Hypertension and CVD                                                                                                                                                                                         | 80 / 271           | <b>1.83</b> | <b>1.34</b> | <b>2.51</b> | 47 / 151                                         | <b>2.16</b> | <b>1.17</b> | <b>3.98</b>  | 34 / 108                                | <b>2.05</b> | <b>1.00</b> | <b>4.19</b> | 27 / 96                                                       | 1.46        | 0.75        | 2.83        |
| Chronic lung disease                                                                                                                                                                                         | 122 / 602          | <b>1.68</b> | <b>1.23</b> | <b>2.29</b> | 66 / 334                                         | 1.47        | 0.95        | 2.27         | 55 / 246                                | 1.43        | 0.92        | 2.23        | 51 / 243                                                      | <b>2.08</b> | <b>1.48</b> | <b>2.93</b> |
| Chronic kidney disease                                                                                                                                                                                       | 69 / 233           | 1.57        | 0.97        | 2.57        | 24 / 95                                          | 1.18        | 0.61        | 2.29         | 18 / 71                                 | 1.08        | 0.51        | 2.28        | 38 / 116                                                      | <b>2.07</b> | <b>1.18</b> | <b>3.62</b> |
| Diabetes mellitus                                                                                                                                                                                            | 90 / 461           | 1.36        | 0.89        | 2.08        | 50 / 274                                         | 1.29        | 0.92        | 1.81         | 35 / 188                                | 1.07        | 0.70        | 1.63        | 31 / 147                                                      | 1.28        | 0.61        | 2.69        |
| Rheumatic disease                                                                                                                                                                                            |                    |             |             |             |                                                  |             |             |              |                                         |             |             |             |                                                               |             |             |             |
| Rheumatoid arthritis                                                                                                                                                                                         | 137 / 1055         | 1           | [Reference] |             | 143 / 1091                                       | 1           | [Reference] |              |                                         |             |             |             |                                                               |             | n.a.        |             |
| Systemic lupus erythematosus                                                                                                                                                                                 | 35 / 336           | 1.31        | 0.77        | 2.23        |                                                  | n.a.        |             |              |                                         | n.a.        |             |             | 31 / 326                                                      | 1           | [Reference] |             |

|                                                                 |           |             |             |             |          |             |             |              |          |             |             |              |          |             |             |              |
|-----------------------------------------------------------------|-----------|-------------|-------------|-------------|----------|-------------|-------------|--------------|----------|-------------|-------------|--------------|----------|-------------|-------------|--------------|
| Vasculitis                                                      | 63 / 284  | 0.92        | 0.67        | 1.26        |          |             |             |              |          |             |             |              | 60 / 277 | 0.81        | 0.49        | 1.35         |
| Other connective tissue diseases                                | 50 / 407  | 0.83        | 0.62        | 1.12        |          |             |             |              |          |             |             |              | 48 / 396 | 0.80        | 0.40        | 1.61         |
| Psoriasis arthritis                                             | 17 / 324  | <b>0.76</b> | <b>0.60</b> | <b>0.97</b> | 17 / 331 | 0.85        | 0.61        | 1.17         |          |             |             |              |          |             |             |              |
| Spondyloarthritis                                               | 14 / 291  | 0.77        | 0.38        | 1.58        | 14 / 292 | 0.92        | 0.46        | 1.83         |          |             |             |              |          |             |             |              |
| Other inflammatory arthritis or non-systemic JIA                | 9 / 84    | 0.86        | 0.57        | 1.31        | 10 / 89  | 0.90        | 0.57        | 1.44         |          |             |             |              |          |             |             |              |
| Other rheumatic diseases (not IJDs / CTDs / vasculitis)         | 20 / 187  | <b>0.49</b> | <b>0.35</b> | <b>0.70</b> |          | n.a.        |             |              |          |             |             |              |          |             |             |              |
| High/moderate/severe disease activity (DA) vs. remission/low DA | 97 / 575  | <b>1.77</b> | <b>1.15</b> | <b>2.73</b> | 47 / 337 | <b>1.63</b> | <b>1.06</b> | <b>2.50</b>  | 37 / 206 | 1.63        | 0.98        | 2.71         | 47 / 204 | <b>2.11</b> | <b>1.28</b> | <b>3.46</b>  |
| Medication                                                      |           |             |             |             |          |             |             |              |          |             |             |              |          |             |             |              |
| Methotrexate                                                    | 45 / 476  | 1           | [Reference] |             | 39 / 387 | 1           | [Reference] |              | 32 / 279 | 1           | [Reference] |              | 6 / 80   | 1           | [Reference] |              |
| No DMARD therapy                                                | 109 / 620 | <b>1.88</b> | <b>1.31</b> | <b>2.68</b> | 28 / 187 | <b>1.58</b> | <b>1.01</b> | <b>2.46</b>  | 17 / 88  | 1.55        | 0.92        | 2.61         | 64 / 309 | <b>3.22</b> | <b>1.58</b> | <b>6.56</b>  |
| Leflunomide                                                     | 10 / 75   | 1.38        | 0.79        | 2.40        | 8 / 68   | 1.15        | 0.60        | 2.20         | 7 / 56   | 1.12        | 0.56        | 2.26         |          |             |             | n.a.         |
| Antimalarials                                                   | 24 / 360  | 0.86        | 0.52        | 1.43        | 15 / 138 | 1.02        | 0.51        | 2.03         | 15 / 116 | 1.09        | 0.54        | 2.18         | 10 / 231 | 1.30        | 0.43        | 3.88         |
| Sulfasalazine                                                   | 28 / 119  | <b>3.16</b> | <b>1.36</b> | <b>7.37</b> | 26 / 113 | <b>2.91</b> | <b>1.14</b> | <b>7.43</b>  | 18 / 75  | 2.25        | 0.98        | 5.17         |          |             |             | n.a.         |
| Immunosuppressants                                              | 36 / 238  | <b>1.99</b> | <b>1.27</b> | <b>3.13</b> |          | n.a.        |             |              |          | n.a.        |             |              | 31 / 213 | <b>2.46</b> | <b>1.11</b> | <b>5.42</b>  |
| TNF inhibitors                                                  | 29 / 575  | 0.92        | 0.57        | 1.49        | 25 / 544 | 0.83        | 0.45        | 1.54         | 15 / 229 | 0.87        | 0.37        | 2.05         | 4 / 34   | 2.09        | 0.33        | 13.30        |
| Abatacept                                                       | 8 / 68    | 1.06        | 0.57        | 1.96        | 8 / 62   | 1.14        | 0.57        | 2.29         | 8 / 56   | 1.21        | 0.57        | 2.58         |          |             |             | n.a.         |
| Rituximab                                                       | 35 / 160  | <b>3.28</b> | <b>1.89</b> | <b>5.69</b> | 19 / 72  | <b>5.32</b> | <b>2.54</b> | <b>11.13</b> | 18 / 68  | <b>4.80</b> | <b>2.24</b> | <b>10.29</b> | 19 / 89  | <b>3.29</b> | <b>1.04</b> | <b>10.43</b> |
| Belimumab                                                       | 1 / 23    | 0.66        | 0.19        | 2.31        |          | n.a.        |             |              |          | n.a.        |             |              | 1 / 23   | 1.09        | 0.22        | 5.39         |
| IL-6 inhibitors                                                 | 5 / 66    | 0.91        | 0.43        | 1.90        | 1 / 47   | 0.29        | 0.03        | 2.80         | 1 / 42   | 0.29        | 0.03        | 2.79         | 4 / 21   | 2.72        | 0.91        | 8.09         |

|                                                                                                                                                                                                                                                                                                                                                                                                                                      |            |             |             |             |           |      |             |      |          |      |             |      |          |             |             |             |
|--------------------------------------------------------------------------------------------------------------------------------------------------------------------------------------------------------------------------------------------------------------------------------------------------------------------------------------------------------------------------------------------------------------------------------------|------------|-------------|-------------|-------------|-----------|------|-------------|------|----------|------|-------------|------|----------|-------------|-------------|-------------|
| IL-17/IL-23/IL-12+23 inhibitors                                                                                                                                                                                                                                                                                                                                                                                                      | 1 / 89     | 0.30        | 0.04        | 2.36        | 1 / 87    | 0.31 | 0.04        | 2.29 |          | n.a. |             |      | n.a.     |             |             |             |
| tsDMARDs                                                                                                                                                                                                                                                                                                                                                                                                                             | 14 / 114   | 1.66        | 0.85        | 3.21        | 14 / 111  | 1.80 | 0.96        | 3.34 | 12 / 91  | 1.54 | 0.66        | 3.60 | n.a.     |             |             |             |
| Glucocorticoids (GCs)                                                                                                                                                                                                                                                                                                                                                                                                                |            |             |             |             |           |      |             |      |          |      |             |      |          |             |             |             |
| No GCs                                                                                                                                                                                                                                                                                                                                                                                                                               | 148 / 1884 | 1           | [Reference] |             | 97 / 1298 | 1    | [Reference] |      | 67 / 681 | 1    | [Reference] |      | 36 / 467 | 1           | [Reference] |             |
| GCs 1-10mg/d                                                                                                                                                                                                                                                                                                                                                                                                                         | 151 / 883  | 1.39        | 0.93        | 2.06        | 76 / 454  | 1.32 | 0.71        | 2.46 | 67 / 371 | 1.38 | 0.64        | 3.00 | 70 / 406 | <b>1.74</b> | <b>1.14</b> | <b>2.67</b> |
| GCs > 10 mg/d                                                                                                                                                                                                                                                                                                                                                                                                                        | 46 / 200   | <b>1.68</b> | <b>1.11</b> | <b>2.56</b> | 11 / 51   | 1.41 | 0.68        | 2.90 | 9 / 38   | 1.38 | 0.59        | 3.22 | 33 / 126 | <b>2.16</b> | <b>1.21</b> | <b>3.88</b> |
| Missing values imputed via multiple imputation, patient numbers may thus be rounded. Effects significant at level $\alpha=0.05$ are marked in bold. Patients were excluded from a particular analysis if the medication they received provided $\leq 20$ patients for that analysis or if there were no deaths reported for that specific medication.                                                                                |            |             |             |             |           |      |             |      |          |      |             |      |          |             |             |             |
| CI, confidence interval; CTD, connective tissue diseases; CVD, cardiovascular disease; DA, disease activity; DMARD, disease modifying antirheumatic drugs; GC, glucocorticoids; IJD, inflammatory joint diseases; IL, interleukin; JIA, juvenile idiopathic arthritis; N, number; OR, odds ratio; SLE, systemic lupus erythematosus; TNF; tumour necrosis factor; tsDMARD, targeted synthetic disease modifying antirheumatic drugs. |            |             |             |             |           |      |             |      |          |      |             |      |          |             |             |             |

| Supplementary table 7. Multivariable logistic regression analysis of factors associated with COVID-19-related death or invasive ventilation in patients with rheumatic diseases |                            |             |                         |                                                  |             |                          |                                         |             |                          |                                                               |             |                         |  |  |
|---------------------------------------------------------------------------------------------------------------------------------------------------------------------------------|----------------------------|-------------|-------------------------|--------------------------------------------------|-------------|--------------------------|-----------------------------------------|-------------|--------------------------|---------------------------------------------------------------|-------------|-------------------------|--|--|
|                                                                                                                                                                                 | All                        |             |                         | Patients with inflammatory joint diseases (IJDs) |             |                          | Only patients with rheumatoid arthritis |             |                          | Patients with connective tissue diseases (CTDs) or vasculitis |             |                         |  |  |
| N deaths or invasive ventilations (IV) /patients (%)                                                                                                                            | 451 / 3075 (14.7%)         |             |                         | 248 / 1970 (12.6%)                               |             |                          | 188 / 1148 (16.4%)                      |             |                          | 170 / 925 (18.4%)                                             |             |                         |  |  |
|                                                                                                                                                                                 | N deaths or IVs / patients | OR          | 95% CI                  | N deaths or IVs / patients                       | OR          | 95% CI                   | N deaths or IVs/patients                | OR          | 95% CI                   | N deaths or IVs / patients                                    | OR          | 95% CI                  |  |  |
| Age, years                                                                                                                                                                      |                            |             |                         |                                                  |             |                          |                                         |             |                          |                                                               |             |                         |  |  |
| Age ≤ 65                                                                                                                                                                        | 168 / 2173                 | 1           | [Reference]             | 81 / 1425                                        | 1           | [Reference]              | 51 / 721                                | 1           | [Reference]              | 80 / 638                                                      | 1           | [Reference]             |  |  |
| 65 years < Age ≤ 75                                                                                                                                                             | 120 / 507                  | <b>2.55</b> | <b>2.00</b> <b>3.26</b> | 78 / 339                                         | <b>2.95</b> | <b>2.14</b> <b>4.06</b>  | 62 / 253                                | <b>3.09</b> | <b>1.96</b> <b>4.88</b>  | 90 / 287                                                      | <b>1.54</b> | <b>1.14</b> <b>2.09</b> |  |  |
| Age > 75                                                                                                                                                                        | 163 / 395                  | <b>5.19</b> | <b>3.35</b> <b>8.03</b> | 89 / 206                                         | <b>7.22</b> | <b>3.90</b> <b>13.35</b> | 75 / 174                                | <b>7.11</b> | <b>3.65</b> <b>13.85</b> | 58 / 146                                                      | <b>3.21</b> | <b>2.08</b> <b>4.96</b> |  |  |
| Male sex (vs. female)                                                                                                                                                           | 184 / 977                  | <b>1.50</b> | <b>1.12</b> <b>2.00</b> | 92 / 652                                         | 1.29        | 0.91 1.83                | 61 / 287                                | 1.20        | 0.74 1.96                | 72 / 242                                                      | <b>1.76</b> | <b>1.18</b> <b>2.60</b> |  |  |
| Ever smoked (vs. never)                                                                                                                                                         | 161 / 821                  | 0.98        | 0.74 1.30               | 96 / 541                                         | 0.99        | 0.70 1.39                | 78 / 344                                | 1.10        | 0.74 1.63                | 51 / 222                                                      | 1.01        | 0.65 1.58               |  |  |
| Comorbidities                                                                                                                                                                   |                            |             |                         |                                                  |             |                          |                                         |             |                          |                                                               |             |                         |  |  |
| Hypertension alone or CVD alone                                                                                                                                                 | 184 / 927                  | <b>1.33</b> | <b>1.02</b> <b>1.74</b> | 94 / 560                                         | 1.22        | 0.86 1.72                | 74 / 371                                | 1.15        | 0.80 1.66                | 79 / 323                                                      | <b>1.53</b> | <b>1.13</b> <b>2.06</b> |  |  |
| Hypertension and CVD                                                                                                                                                            | 95 / 252                   | <b>1.90</b> | <b>1.25</b> <b>2.88</b> | 57 / 144                                         | <b>2.33</b> | <b>1.20</b> <b>4.53</b>  | 41 / 101                                | 1.96        | 0.93 4.15                | 30 / 82                                                       | 1.55        | 0.74 3.22               |  |  |
| Chronic lung disease                                                                                                                                                            | 158 / 590                  | <b>1.80</b> | <b>1.38</b> <b>2.35</b> | 91 / 328                                         | <b>1.87</b> | <b>1.26</b> <b>2.78</b>  | 74 / 234                                | <b>1.76</b> | <b>1.21</b> <b>2.56</b>  | 62 / 233                                                      | <b>2.11</b> | <b>1.52</b> <b>2.93</b> |  |  |
| Chronic kidney disease                                                                                                                                                          | 86 / 211                   | <b>2.00</b> | <b>1.24</b> <b>3.22</b> | 30 / 93                                          | 1.13        | 0.61 2.11                | 23 / 69                                 | 1.01        | 0.48 2.11                | 46 / 98                                                       | <b>3.16</b> | <b>1.69</b> <b>5.90</b> |  |  |
| Diabetes mellitus                                                                                                                                                               | 108 / 393                  | 1.44        | 0.97 2.14               | 62 / 246                                         | <b>1.30</b> | <b>1.02</b> <b>1.67</b>  | 44 / 171                                | 1.17        | 0.80 1.71                | 35 / 114                                                      | 1.42        | 0.61 3.31               |  |  |
| Rheumatic disease                                                                                                                                                               |                            |             |                         |                                                  |             |                          |                                         |             |                          |                                                               |             |                         |  |  |
| Rheumatoid arthritis                                                                                                                                                            | 180 / 1107                 | 1           | [Reference]             | 188 / 1150                                       | 1           | [Reference]              |                                         |             | n.a.                     |                                                               |             | n.a.                    |  |  |

|                                                                 |           |             |             |             |          |             |             |              |          |             |             |              |          |             |             |             |
|-----------------------------------------------------------------|-----------|-------------|-------------|-------------|----------|-------------|-------------|--------------|----------|-------------|-------------|--------------|----------|-------------|-------------|-------------|
| Systemic lupus erythematosus                                    | 46 / 322  | 1.26        | 0.83        | 1.91        |          | n.a.        |             |              |          |             |             |              | 42 / 310 | 1           | [Reference] |             |
| Vasculitis                                                      | 72 / 267  | 0.77        | 0.59        | 1.02        |          | n.a.        |             |              |          |             |             |              | 65 / 246 | 0.74        | 0.50        | 1.09        |
| Other connective tissue diseases                                | 66 / 381  | 0.89        | 0.62        | 1.28        |          | n.a.        |             |              |          |             |             |              | 63 / 369 | 0.95        | 0.54        | 1.65        |
| Psoriasis arthritis                                             | 27 / 362  | 0.74        | 0.51        | 1.07        | 27 / 369 | 0.78        | 0.51        | 1.18         |          |             |             |              |          |             |             |             |
| Spondyloarthritis                                               | 18 / 357  | 0.67        | 0.35        | 1.27        | 18 / 358 | 0.72        | 0.37        | 1.41         |          |             |             |              |          |             |             |             |
| Other inflammatory arthritis or non-systemic JIA                | 13 / 88   | 1.04        | 0.72        | 1.49        | 15 / 93  | 1.13        | 0.83        | 1.54         |          |             |             |              |          |             |             |             |
| Other rheumatic diseases (not IJDs / CTDs / vasculitis)         | 29 / 191  | <b>0.55</b> | <b>0.36</b> | <b>0.83</b> |          | n.a.        |             |              |          |             |             |              |          |             |             |             |
| High/moderate/severe disease activity (DA) vs. remission/low DA | 119 / 592 | <b>1.57</b> | <b>1.13</b> | <b>2.19</b> | 60 / 380 | 1.35        | 0.96        | 1.89         | 48 / 235 | 1.32        | 0.88        | 1.98         | 53 / 182 | <b>1.98</b> | <b>1.21</b> | <b>3.24</b> |
| Medication                                                      |           |             |             |             |          |             |             |              |          |             |             |              |          |             |             |             |
| Methotrexate                                                    | 56 / 468  | 1           | [Reference] |             | 48 / 390 | 1           | [Reference] |              | 39 / 289 | 1           | [Reference] |              | 8 / 70   | 1           | [Reference] |             |
| No DMARD therapy                                                | 139 / 622 | <b>1.96</b> | <b>1.26</b> | <b>3.06</b> | 41 / 208 | <b>1.93</b> | <b>1.15</b> | <b>3.23</b>  | 25 / 92  | <b>2.00</b> | <b>1.18</b> | <b>3.40</b>  | 75 / 287 | <b>2.77</b> | <b>1.48</b> | <b>5.19</b> |
| Leflunomide                                                     | 15 / 71   | 1.83        | 0.96        | 3.48        | 13 / 66  | 1.72        | 0.81        | 3.69         | 12 / 56  | 1.86        | 0.92        | 3.78         |          |             | n.a.        |             |
| Antimalarials                                                   | 35 / 357  | 1.02        | 0.67        | 1.56        | 20 / 142 | 1.13        | 0.61        | 2.10         | 19 / 117 | 1.25        | 0.67        | 2.31         | 17 / 225 | 1.53        | 0.67        | 3.48        |
| Sulfasalazine                                                   | 37 / 120  | <b>3.67</b> | <b>1.85</b> | <b>7.26</b> | 35 / 113 | <b>3.67</b> | <b>1.75</b> | <b>7.70</b>  | 24 / 70  | <b>3.04</b> | <b>1.43</b> | <b>6.45</b>  |          |             | n.a.        |             |
| Immunosuppressants                                              | 45 / 231  | <b>1.80</b> | <b>1.19</b> | <b>2.72</b> |          | n.a.        |             |              |          | n.a.        |             |              | 38 / 209 | 1.70        | 0.91        | 3.18        |
| TNF inhibitors                                                  | 39 / 692  | 0.86        | 0.53        | 1.37        | 34 / 657 | 0.83        | 0.48        | 1.43         | 22 / 254 | 0.98        | 0.52        | 1.86         | 6 / 37   | 1.73        | 0.33        | 9.04        |
| Abatacept                                                       | 11 / 65   | 1.28        | 0.61        | 2.71        | 11 / 62  | 1.40        | 0.63        | 3.12         | 11 / 58  | 1.55        | 0.71        | 3.42         |          |             | n.a.        |             |
| Rituximab                                                       | 46 / 144  | <b>4.31</b> | <b>2.48</b> | <b>7.49</b> | 25 / 72  | <b>5.99</b> | <b>3.00</b> | <b>11.96</b> | 24 / 69  | <b>6.04</b> | <b>3.01</b> | <b>12.09</b> | 23 / 75  | <b>3.15</b> | <b>1.12</b> | <b>8.90</b> |
| Belimumab                                                       | 3 / 22    | 1.84        | 0.58        | 5.87        |          | n.a.        |             |              |          | n.a.        |             |              | 3 / 22   | 2.25        | 0.73        | 6.98        |

|                                                                                                                                                                                                                                                                                                                                                                                                                                                                                                                                                                                                                                                                                                                                                                                                                                                                                                                                                                      |            |             |             |             |            |      |             |      |          |      |             |      |          |             |             |             |
|----------------------------------------------------------------------------------------------------------------------------------------------------------------------------------------------------------------------------------------------------------------------------------------------------------------------------------------------------------------------------------------------------------------------------------------------------------------------------------------------------------------------------------------------------------------------------------------------------------------------------------------------------------------------------------------------------------------------------------------------------------------------------------------------------------------------------------------------------------------------------------------------------------------------------------------------------------------------|------------|-------------|-------------|-------------|------------|------|-------------|------|----------|------|-------------|------|----------|-------------|-------------|-------------|
| IL-6 inhibitors                                                                                                                                                                                                                                                                                                                                                                                                                                                                                                                                                                                                                                                                                                                                                                                                                                                                                                                                                      | 5 / 77     | 0.75        | 0.34        | 1.63        | 1 / 60     | 0.22 | 0.02        | 2.09 | 1 / 55   | 0.22 | 0.02        | 2.14 |          | n.a.        |             |             |
| IL-17/IL-23/IL-12+23 inhibitors                                                                                                                                                                                                                                                                                                                                                                                                                                                                                                                                                                                                                                                                                                                                                                                                                                                                                                                                      | 6 / 92     | 1.42        | 0.59        | 3.43        | 6 / 89     | 1.58 | 0.63        | 3.96 |          | n.a. |             |      |          |             |             |             |
| tsDMARDs                                                                                                                                                                                                                                                                                                                                                                                                                                                                                                                                                                                                                                                                                                                                                                                                                                                                                                                                                             | 17 / 125   | 1.45        | 0.81        | 2.59        | 17 / 122   | 1.67 | 0.94        | 2.97 | 14 / 99  | 1.51 | 0.76        | 3.02 |          |             |             |             |
| Glucocorticoids (GCs)                                                                                                                                                                                                                                                                                                                                                                                                                                                                                                                                                                                                                                                                                                                                                                                                                                                                                                                                                |            |             |             |             |            |      |             |      |          |      |             |      |          |             |             |             |
| No GCs                                                                                                                                                                                                                                                                                                                                                                                                                                                                                                                                                                                                                                                                                                                                                                                                                                                                                                                                                               | 202 / 2032 | 1           | [Reference] |             | 136 / 1450 | 1    | [Reference] |      | 90 / 722 | 1    | [Reference] |      | 45 / 452 | 1           | [Reference] |             |
| GCs 1-10mg/d                                                                                                                                                                                                                                                                                                                                                                                                                                                                                                                                                                                                                                                                                                                                                                                                                                                                                                                                                         | 191 / 860  | <b>1.45</b> | <b>1.03</b> | <b>2.04</b> | 99 / 468   | 1.31 | 0.72        | 2.38 | 87 / 389 | 1.37 | 0.68        | 2.73 | 86 / 362 | <b>2.02</b> | <b>1.44</b> | <b>2.84</b> |
| GCs > 10 mg/d                                                                                                                                                                                                                                                                                                                                                                                                                                                                                                                                                                                                                                                                                                                                                                                                                                                                                                                                                        | 58 / 183   | <b>2.11</b> | <b>1.44</b> | <b>3.11</b> | 13 / 53    | 1.47 | 0.58        | 3.74 | 11 / 37  | 1.74 | 0.56        | 5.40 | 39 / 111 | <b>2.51</b> | <b>1.47</b> | <b>4.27</b> |
| <p>Living patients with missing values for invasive ventilation excluded from the model (dependent variable unknown). Missing values in other variables imputed via multiple imputation, patient numbers may thus be rounded. Effects significant at level <math>\alpha=0.05</math> are marked in bold. Patients were excluded from a particular analysis if the medication they received provided <math>\leq 20</math> patients for that analysis or if there were no deaths reported for that specific medication.</p> <p>CI, confidence interval; CTD, connective tissue diseases; CVD, cardiovascular disease; DA, disease activity; DMARD, disease modifying antirheumatic drugs; GC, glucocorticoids; IJD, inflammatory joint diseases; IL, interleukin; JIA, juvenile idiopathic arthritis; N, number; OR, odds ratio; SLE, systemic lupus erythematosus; TNF, tumour necrosis factor; tsDMARD, targeted synthetic disease modifying antirheumatic drugs.</p> |            |             |             |             |            |      |             |      |          |      |             |      |          |             |             |             |

| Supplementary table 8. Multivariable logistic regression analysis of factors associated with COVID-19-related death in all patients with a reduced number of regressor variables |                   |             |             |             |                                                  |             |             |             |                                         |             |             |             |                                                               |             |             |             |
|----------------------------------------------------------------------------------------------------------------------------------------------------------------------------------|-------------------|-------------|-------------|-------------|--------------------------------------------------|-------------|-------------|-------------|-----------------------------------------|-------------|-------------|-------------|---------------------------------------------------------------|-------------|-------------|-------------|
|                                                                                                                                                                                  | All               |             |             |             | Patients with inflammatory joint diseases (IJDs) |             |             |             | Only patients with rheumatoid arthritis |             |             |             | Patients with connective tissue diseases (CTDs) or vasculitis |             |             |             |
| N deaths/patients (%)                                                                                                                                                            | 384/3705 (10.4%)  |             |             |             | 211/2348 (9.0%)                                  |             |             |             | 166/1371 (12.1%)                        |             |             |             | 147/1157 (12.7%)                                              |             |             |             |
|                                                                                                                                                                                  | N deaths/patients | OR          | 95% CI      |             | N deaths/patients                                | OR          | 95% CI      |             | N deaths/patients                       | OR          | 95% CI      |             | N deaths/patients                                             | OR          | 95% CI      |             |
| Age, years                                                                                                                                                                       |                   |             |             |             |                                                  |             |             |             |                                         |             |             |             |                                                               |             |             |             |
| Age ≤ 65                                                                                                                                                                         | 118 / 2565        | 1           | [Reference] |             | 55 / 1657                                        | 1           | [Reference] |             | 40 / 840                                | 1           | [Reference] |             | 56 / 779                                                      | 1           | [Reference] |             |
| Age > 65                                                                                                                                                                         | 266 / 1140        | <b>4.10</b> | <b>3.06</b> | <b>5.49</b> | 156 / 691                                        | <b>5.00</b> | <b>3.63</b> | <b>6.88</b> | 126 / 531                               | <b>4.40</b> | <b>2.74</b> | <b>7.08</b> | 91 / 378                                                      | <b>3.15</b> | <b>1.91</b> | <b>5.18</b> |
| Male sex (vs. female)                                                                                                                                                            | 161 / 1188        | <b>1.41</b> | <b>1.08</b> | <b>1.86</b> | 82 / 788                                         | 1.27        | 0.94        | 1.72        | 55 / 345                                | 1.14        | 0.77        | 1.70        | 63 / 296                                                      | 1.64        | 0.97        | 2.77        |
| Ever smoked (vs. never)                                                                                                                                                          | 140 / 922         | 1.18        | 0.89        | 1.56        | 84 / 607                                         | 1.21        | 0.88        | 1.66        | 71 / 385                                | 1.38        | 1.00        | 1.92        | 42 / 248                                                      | 1.07        | 0.63        | 1.81        |
| Comorbidities                                                                                                                                                                    |                   |             |             |             |                                                  |             |             |             |                                         |             |             |             |                                                               |             |             |             |
| Hypertension alone or CVD alone                                                                                                                                                  | 155 / 1150        | 1.23        | 0.91        | 1.66        | 79 / 690                                         | 1.08        | 0.77        | 1.51        | 66 / 454                                | 1.16        | 0.78        | 1.74        | 69 / 406                                                      | <b>1.58</b> | <b>1.06</b> | <b>2.35</b> |
| Hypertension and CVD                                                                                                                                                             | 89 / 301          | <b>2.13</b> | <b>1.42</b> | <b>3.18</b> | 53 / 168                                         | <b>2.66</b> | <b>1.54</b> | <b>4.60</b> | 38 / 118                                | <b>2.48</b> | <b>1.34</b> | <b>4.56</b> | 28 / 106                                                      | 1.65        | 0.80        | 3.43        |
| Chronic lung disease                                                                                                                                                             | 136 / 721         | <b>1.63</b> | <b>1.21</b> | <b>2.20</b> | 76 / 406                                         | <b>1.51</b> | <b>1.01</b> | <b>2.26</b> | 63 / 293                                | 1.45        | 0.96        | 2.20        | 54 / 285                                                      | <b>1.92</b> | <b>1.37</b> | <b>2.69</b> |
| Chronic kidney disease                                                                                                                                                           | 76 / 259          | <b>1.84</b> | <b>1.07</b> | <b>3.19</b> | 27 / 111                                         | 1.25        | 0.59        | 2.64        | 21 / 83                                 | 1.17        | 0.50        | 2.75        | 41 / 124                                                      | <b>2.46</b> | <b>1.41</b> | <b>4.30</b> |
| Diabetes mellitus                                                                                                                                                                | 96 / 508          | 1.35        | 0.87        | 2.10        | 55 / 313                                         | 1.27        | 0.93        | 1.73        | 39 / 213                                | 1.06        | 0.71        | 1.57        | 32 / 154                                                      | 1.37        | 0.65        | 2.89        |
| Rheumatic disease                                                                                                                                                                |                   |             |             |             |                                                  |             |             |             |                                         |             |             |             |                                                               |             |             |             |
| Rheumatoid arthritis                                                                                                                                                             | 160 / 1326        | 1           | [Reference] |             | 166 / 1373                                       | 1           | [Reference] |             |                                         |             |             |             |                                                               | n.a.        |             |             |
| Systemic lupus erythematosus                                                                                                                                                     | 36 / 391          | 1.10        | 0.67        | 1.81        |                                                  |             |             |             |                                         |             |             |             | 32 / 378                                                      | 1           | [Reference] |             |
| Vasculitis                                                                                                                                                                       | 67 / 325          | 0.85        | 0.64        | 1.11        |                                                  | n.a.        |             |             |                                         |             |             |             |                                                               |             |             |             |
| Other connective tissue diseases                                                                                                                                                 | 53 / 473          | <b>0.75</b> | <b>0.57</b> | <b>0.97</b> |                                                  |             |             |             |                                         |             |             |             | 115 / 479                                                     | 0.89        | 0.53        | 1.49        |
| Psoriasis arthritis                                                                                                                                                              | 19 / 429          | 0.66        | 0.49        | 0.90        | 19 / 437                                         | 0.73        | 0.52        | 1.04        |                                         |             |             |             |                                                               | n.a.        |             |             |



|                                                                 |            |             |             |             |            |             |             |             |          |             |             |             |          |             |             |              |
|-----------------------------------------------------------------|------------|-------------|-------------|-------------|------------|-------------|-------------|-------------|----------|-------------|-------------|-------------|----------|-------------|-------------|--------------|
| Spondyloarthritis                                               | 15 / 423   | 0.66        | 0.32        | 1.35        | 15 / 424   | 0.76        | 0.39        | 1.48        |          |             |             |             |          |             |             |              |
| Other inflammatory arthritis or non-systemic JIA                | 10 / 109   | 0.73        | 0.44        | 1.22        | 11 / 114   | 0.70        | 0.40        | 1.23        |          |             |             |             |          |             |             |              |
| Other rheumatic diseases (not IJDs / CTDs / vasculitis)         | 24 / 229   | <b>0.52</b> | <b>0.36</b> | <b>0.74</b> |            | n.a.        |             |             |          |             |             |             |          |             |             |              |
| High/moderate/severe disease activity (DA) vs. remission/low DA | 109 / 722  | <b>1.84</b> | <b>1.31</b> | <b>2.59</b> | 54 / 453   | <b>1.49</b> | <b>1.09</b> | <b>2.02</b> | 44 / 274 | 1.49        | 0.99        | 2.23        | 51 / 230 | <b>2.54</b> | <b>1.63</b> | <b>3.95</b>  |
| Medication                                                      |            |             |             |             |            |             |             |             |          |             |             |             |          |             |             |              |
| Methotrexate                                                    | 47 / 595   | 1           | [Reference] |             | 41 / 487   | 1           | [Reference] |             | 34 / 354 | 1           | [Reference] |             | 6 / 94   | 1           | [Reference] |              |
| No DMARD therapy                                                | 124 / 739  | <b>2.20</b> | <b>1.55</b> | <b>3.12</b> | 38 / 239   | <b>2.14</b> | <b>1.44</b> | <b>3.17</b> | 25 / 110 | <b>2.12</b> | <b>1.36</b> | <b>3.29</b> | 67 / 353 | <b>3.43</b> | <b>1.72</b> | <b>6.85</b>  |
| Leflunomide                                                     | 12 / 90    | 1.47        | 0.81        | 2.66        | 10 / 83    | 1.27        | 0.62        | 2.61        | 9 / 68   | 1.32        | 0.63        | 2.73        |          | n.a.        |             |              |
| Antimalarials                                                   | 27 / 426   | 0.96        | 0.64        | 1.43        | 17 / 167   | 1.07        | 0.59        | 1.93        | 17 / 141 | 1.15        | 0.63        | 2.10        | 11 / 271 | 1.46        | 0.50        | 4.23         |
| Sulfasalazine                                                   | 33 / 144   | <b>3.49</b> | <b>1.64</b> | <b>7.45</b> | 31 / 137   | <b>3.22</b> | <b>1.44</b> | <b>7.23</b> | 21 / 85  | <b>2.43</b> | <b>1.17</b> | <b>5.04</b> |          | n.a.        |             |              |
| Immunosuppressants                                              | 38 / 276   | <b>2.18</b> | <b>1.44</b> | <b>3.32</b> |            | n.a.        |             |             |          | n.a.        |             |             | 32 / 247 | <b>2.54</b> | <b>1.15</b> | <b>5.63</b>  |
| Rituximab                                                       | 42 / 192   | <b>3.77</b> | <b>2.23</b> | <b>6.36</b> | 22 / 90    | <b>4.91</b> | <b>2.60</b> | <b>9.25</b> | 21 / 86  | <b>4.57</b> | <b>2.35</b> | <b>8.92</b> | 22 / 104 | <b>3.68</b> | <b>1.24</b> | <b>10.92</b> |
| TNF inhibitors                                                  | 30 / 803   | 0.82        | 0.52        | 1.29        | 26 / 764   | 0.73        | 0.41        | 1.29        | 16 / 292 | 0.77        | 0.37        | 1.60        | 9 / 89   | 2.04        | 0.60        | 6.92         |
| Belimumab                                                       |            |             |             |             |            | n.a.        |             |             |          | n.a.        |             |             |          |             |             |              |
| IL-6 inhibitors                                                 |            |             |             |             |            |             |             |             |          |             |             |             |          |             |             |              |
| Abatacept                                                       | 16 / 313   | 0.82        | 0.47        | 1.42        | 11 / 255   | 0.69        | 0.35        | 1.36        | 10 / 131 | 0.89        | 0.40        | 1.98        |          |             |             |              |
| IL-17/IL-23/IL-12+23 inhibitors                                 |            |             |             |             |            |             |             |             | n.a.     |             |             | n.a.        |          |             |             |              |
| tsDMARDs                                                        | 15 / 145   | 1.38        | 0.80        | 2.36        | 15 / 142   | 1.45        | 0.85        | 2.47        | 13 / 118 | 1.28        | 0.66        | 2.49        |          |             |             |              |
| Glucocorticoids (GCs)                                           |            |             |             |             |            |             |             |             |          |             |             |             |          |             |             |              |
| No GCs                                                          | 165 / 2417 | 1           | [Reference] |             | 109 / 1721 | 1           | [Reference] |             | 78 / 863 | 1           | [Reference] |             | 38 / 551 | 1           | [Reference] |              |

|               |            |             |             |             |           |      |      |      |          |      |      |      |           |             |             |             |
|---------------|------------|-------------|-------------|-------------|-----------|------|------|------|----------|------|------|------|-----------|-------------|-------------|-------------|
| Glucorticoids | 219 / 1288 | <b>1.50</b> | <b>1.07</b> | <b>2.10</b> | 102 / 627 | 1.46 | 0.86 | 2.47 | 88 / 508 | 1.44 | 0.74 | 2.80 | 109 / 606 | <b>1.77</b> | <b>1.28</b> | <b>2.46</b> |
|---------------|------------|-------------|-------------|-------------|-----------|------|------|------|----------|------|------|------|-----------|-------------|-------------|-------------|

Missing values imputed via multiple imputation, patient numbers may thus be rounded. Effects significant at level  $\alpha=0.05$  are marked in bold. Patients were excluded from a particular analysis if the medication they received provided  $\leq 20$  patients for that analysis or if there were no deaths reported for that specific medication.

CI, confidence interval; CTD, connective tissue diseases; CVD, cardiovascular disease; DA, disease activity; DMARD, disease modifying antirheumatic drugs; GC, glucocorticoids; IJD, inflammatory joint diseases; IL, interleukin; JIA, juvenile idiopathic arthritis; N, number; OR, odds ratio; SLE, systemic lupus erythematosus; TNF; tumour necrosis factor; tsDMARD, targeted synthetic disease modifying antirheumatic drugs.

| <b>Supplementary table 9. Multivariable logistic regression analysis of factors associated with COVID-19 death in patients from the six countries providing the largest number of patients, considering country effects, with an otherwise reduced number of regressor variables</b> |                    |             |             |             |                                                  |             |             |             |                                         |             |             |             |                                                               |             |             |             |
|--------------------------------------------------------------------------------------------------------------------------------------------------------------------------------------------------------------------------------------------------------------------------------------|--------------------|-------------|-------------|-------------|--------------------------------------------------|-------------|-------------|-------------|-----------------------------------------|-------------|-------------|-------------|---------------------------------------------------------------|-------------|-------------|-------------|
|                                                                                                                                                                                                                                                                                      | All                |             |             |             | Patients with inflammatory joint diseases (IJDs) |             |             |             | Only patients with rheumatoid arthritis |             |             |             | Patients with connective tissue diseases (CTDs) or vasculitis |             |             |             |
| N deaths/patients (%)                                                                                                                                                                                                                                                                | 306 / 2974 (10.3%) |             |             |             | 170 / 1903 (8.9%)                                |             |             |             | 134 / 1102 (12.2%)                      |             |             |             | 117 / 927 (12.6%)                                             |             |             |             |
|                                                                                                                                                                                                                                                                                      | N deaths/patients  | OR          | 95% CI      |             | N deaths/patients                                | OR          | 95% CI      |             | N deaths/patients                       | OR          | 95% CI      |             | N deaths/patients                                             | OR          | 95% CI      |             |
| Age, years                                                                                                                                                                                                                                                                           |                    |             |             |             |                                                  |             |             |             |                                         |             |             |             |                                                               |             |             |             |
| Age ≤ 65                                                                                                                                                                                                                                                                             | 76 / 2015          | 1           | [Reference] |             | 36 / 1321                                        | 1           | [Reference] |             | 25 / 658                                | 1           | [Reference] |             | 36 / 597                                                      | 1           | [Reference] |             |
| Age > 65                                                                                                                                                                                                                                                                             | 230 / 959          | <b>4.57</b> | <b>3.24</b> | <b>6.45</b> | 134 / 582                                        | <b>5.83</b> | <b>3.63</b> | <b>9.37</b> | 109 / 444                               | <b>5.15</b> | <b>3.03</b> | <b>8.75</b> | 28 / 160                                                      | <b>2.76</b> | <b>1.59</b> | <b>4.80</b> |
| Male sex (vs. female)                                                                                                                                                                                                                                                                | 141 / 951          | <b>1.68</b> | <b>1.26</b> | <b>2.24</b> | 71 / 640                                         | 1.41        | 0.95        | 2.08        | 47 / 283                                | 1.24        | 0.77        | 1.98        | 56 / 239                                                      | <b>2.03</b> | <b>1.28</b> | <b>3.21</b> |
| Ever smoked (vs. never)                                                                                                                                                                                                                                                              | 118 / 745          | 1.15        | 0.82        | 1.60        | 73 / 500                                         | 1.10        | 0.71        | 1.70        | 61 / 323                                | 1.22        | 0.73        | 2.03        | 36 / 207                                                      | 1.09        | 0.59        | 2.03        |
| Comorbidities                                                                                                                                                                                                                                                                        |                    |             |             |             |                                                  |             |             |             |                                         |             |             |             |                                                               |             |             |             |
| Hypertension alone or CVD alone                                                                                                                                                                                                                                                      | 130 / 941          | <b>1.41</b> | <b>1.01</b> | <b>1.96</b> | 68 / 572                                         | 1.25        | 0.79        | 1.98        | 56 / 369                                | 1.41        | 0.85        | 2.35        | 56 / 326                                                      | <b>1.94</b> | <b>1.13</b> | <b>3.33</b> |
| Hypertension and CVD                                                                                                                                                                                                                                                                 | 73 / 259           | <b>2.16</b> | <b>1.41</b> | <b>3.31</b> | 43 / 141                                         | <b>2.58</b> | <b>1.43</b> | <b>4.68</b> | 32 / 100                                | <b>2.60</b> | <b>1.34</b> | <b>5.04</b> | 26 / 100                                                      | <b>2.09</b> | <b>1.07</b> | <b>4.11</b> |
| Lung disease                                                                                                                                                                                                                                                                         | 115 / 614          | <b>1.58</b> | <b>1.16</b> | <b>2.16</b> | 63 / 344                                         | 1.46        | 0.94        | 2.25        | 53 / 245                                | 1.43        | 0.89        | 2.30        | 47 / 250                                                      | <b>1.83</b> | <b>1.12</b> | <b>2.99</b> |
| Chronic kidney disease                                                                                                                                                                                                                                                               | 59 / 212           | <b>1.73</b> | <b>1.12</b> | <b>2.67</b> | 24 / 97                                          | 1.32        | 0.68        | 2.57        | 19 / 72                                 | 1.28        | 0.63        | 2.62        | 30 / 96                                                       | <b>2.08</b> | <b>1.09</b> | <b>3.96</b> |
| Diabetes mellitus                                                                                                                                                                                                                                                                    | 78 / 410           | 1.26        | 0.89        | 1.79        | 46 / 258                                         | 1.31        | 0.84        | 2.06        | 35 / 181                                | 1.23        | 0.74        | 2.04        | 25 / 122                                                      | 1.09        | 0.57        | 2.07        |
| Rheumatic disease                                                                                                                                                                                                                                                                    |                    |             |             |             |                                                  |             |             |             |                                         |             |             |             |                                                               |             |             |             |
| Rheumatoid arthritis                                                                                                                                                                                                                                                                 | 128 / 1058         | 1           | [Reference] |             | 134 / 1103                                       | 1           | [Reference] |             |                                         |             |             |             |                                                               | n.a.        |             |             |
| Systemic lupus erythematosus                                                                                                                                                                                                                                                         | 18 / 299           | 0.78        | 0.39        | 1.55        |                                                  |             |             |             |                                         |             |             |             | 15 / 288                                                      | 1           | [Reference] |             |
| Vasculitis                                                                                                                                                                                                                                                                           | 60 / 272           | 0.81        | 0.50        | 1.30        |                                                  |             | n.a.        |             |                                         |             | n.a.        |             |                                                               |             |             |             |
| Other connective tissue diseases                                                                                                                                                                                                                                                     | 47 / 384           | 0.93        | 0.58        | 1.47        |                                                  |             |             |             |                                         |             |             |             | 102 / 639                                                     | 1.33        | 0.65        | 2.73        |
| Psoriasis arthritis                                                                                                                                                                                                                                                                  | 17 / 353           | 0.70        | 0.38        | 1.30        | 17 / 360                                         | 0.81        | 0.43        | 1.54        |                                         |             |             |             |                                                               | n.a.        |             |             |

|                                                                 |            |             |             |             |           |             |             |              |          |             |             |              |          |             |             |              |
|-----------------------------------------------------------------|------------|-------------|-------------|-------------|-----------|-------------|-------------|--------------|----------|-------------|-------------|--------------|----------|-------------|-------------|--------------|
| Spondyloarthritis                                               | 10 / 340   | 0.57        | 0.27        | 1.20        | 10 / 340  | 0.70        | 0.33        | 1.50         |          |             |             |              |          |             |             |              |
| Other inflammatory arthritis or non-systemic JIA                | 8 / 95     | 0.68        | 0.30        | 1.58        | 9 / 100   | 0.66        | 0.28        | 1.57         |          |             |             |              |          |             |             |              |
| Other rheumatic diseases (not IJDs / CTDs / vasculitis)         | 18 / 173   | 0.60        | 0.30        | 1.17        |           | n.a.        |             |              |          |             |             |              |          |             |             |              |
| High/moderate/severe disease activity (DA) vs. remission/low DA | 87 / 569   | <b>1.84</b> | <b>1.26</b> | <b>2.69</b> | 48 / 370  | <b>1.64</b> | <b>1.04</b> | <b>2.60</b>  | 39 / 220 | 1.62        | 0.98        | 2.69         | 36 / 170 | <b>2.21</b> | <b>1.18</b> | <b>4.13</b>  |
| Medication                                                      |            |             |             |             |           |             |             |              |          |             |             |              |          |             |             |              |
| Methotrexate                                                    | 34 / 477   | 1           | [Reference] |             | 28 / 387  | 1           | [Reference] |              | 23 / 278 | 1           | [Reference] |              | 6 / 77   | 1           | [Reference] |              |
| No DMARD therapy                                                | 101 / 602  | <b>2.61</b> | <b>1.61</b> | <b>4.26</b> | 32 / 198  | <b>2.75</b> | <b>1.46</b> | <b>5.16</b>  | 21 / 94  | <b>2.40</b> | <b>1.14</b> | <b>5.06</b>  | 56 / 302 | <b>2.82</b> | <b>1.22</b> | <b>6.49</b>  |
| Leflunomide                                                     | 10 / 64    | 2.32        | 0.98        | 5.50        | 8 / 59    | 1.78        | 0.71        | 4.45         | 8 / 48   | 2.16        | 0.81        | 5.76         |          | n.a.        |             |              |
| Antimalarials                                                   | 18 / 312   | 1.15        | 0.59        | 2.22        | 14 / 125  | 1.32        | 0.61        | 2.85         | 14 / 105 | 1.33        | 0.59        | 3.02         | 4 / 197  | 0.90        | 0.24        | 3.37         |
| Sulfasalazine                                                   | 27 / 93    | <b>5.07</b> | <b>2.64</b> | <b>9.74</b> | 26 / 88   | <b>5.10</b> | <b>2.55</b> | <b>10.20</b> | 18 / 51  | <b>3.96</b> | <b>1.72</b> | <b>9.12</b>  |          | n.a.        |             |              |
| Immunosuppressants                                              | 28 / 212   | <b>2.94</b> | <b>1.53</b> | <b>5.63</b> |           | n.a.        |             |              |          | n.a.        |             |              | 23 / 192 | <b>2.59</b> | <b>1.02</b> | <b>6.58</b>  |
| Rituximab                                                       | 35 / 159   | <b>4.38</b> | <b>2.37</b> | <b>8.10</b> | 16 / 74   | <b>4.65</b> | <b>2.02</b> | <b>10.71</b> | 15 / 70  | <b>4.45</b> | <b>1.84</b> | <b>10.77</b> | 21 / 89  | <b>4.17</b> | <b>1.56</b> | <b>11.09</b> |
| TNF inhibitors                                                  | 24 / 660   | 1.10        | 0.61        | 2.00        | 21 / 631  | 0.99        | 0.52        | 1.91         | 13 / 244 | 1.04        | 0.49        | 2.20         |          |             |             |              |
| Belimumab                                                       |            |             |             |             |           | n.a.        |             |              |          | n.a.        |             |              | 7 / 71   | 2.13        | 0.65        | 6.93         |
| IL-6 inhibitors                                                 |            |             |             |             |           |             |             |              |          |             |             |              |          |             |             |              |
| Abatacept                                                       | 14 / 268   | 1.25        | 0.62        | 2.51        | 10 / 216  | 1.05        | 0.46        | 2.40         | 9 / 109  | 1.38        | 0.56        | 3.41         |          | n.a.        |             |              |
| IL-17/IL-23/IL-12+23 inhibitors                                 |            |             |             |             |           |             |             |              |          | n.a.        |             |              |          |             |             |              |
| tsDMARDs                                                        | 15 / 136   | <b>2.32</b> | <b>1.08</b> | <b>4.99</b> | 15 / 133  | <b>2.32</b> | <b>1.05</b> | <b>5.12</b>  | 13 / 110 | 1.97        | 0.87        | 4.51         |          |             |             |              |
| Glucocorticoids (GCs)                                           |            |             |             |             |           |             |             |              |          |             |             |              |          |             |             |              |
| No GCs                                                          | 120 / 1959 | 1           | [Reference] |             | 80 / 1406 | 1           | [Reference] |              | 55 / 701 | 1           | [Reference] |              | 30 / 454 | 1           | [Reference] |              |

|                                                                                                                                                                                                                                                                                                                                                                                                                                      |            |             |             |             |          |             |             |             |          |             |             |             |          |             |             |             |
|--------------------------------------------------------------------------------------------------------------------------------------------------------------------------------------------------------------------------------------------------------------------------------------------------------------------------------------------------------------------------------------------------------------------------------------|------------|-------------|-------------|-------------|----------|-------------|-------------|-------------|----------|-------------|-------------|-------------|----------|-------------|-------------|-------------|
| Glucorticoids                                                                                                                                                                                                                                                                                                                                                                                                                        | 186 / 1015 | <b>1.92</b> | <b>1.40</b> | <b>2.63</b> | 90 / 497 | <b>1.99</b> | <b>1.33</b> | <b>2.98</b> | 79 / 401 | <b>2.16</b> | <b>1.38</b> | <b>3.36</b> | 87 / 473 | <b>1.74</b> | <b>1.02</b> | <b>2.94</b> |
| Countries                                                                                                                                                                                                                                                                                                                                                                                                                            |            |             |             |             |          |             |             |             |          |             |             |             |          |             |             |             |
| USA                                                                                                                                                                                                                                                                                                                                                                                                                                  | 68 / 1001  | 1           | [Reference] |             | 36 / 568 | 1           | [Reference] |             | 31 / 380 | 1           | [Reference] |             | 27 / 380 | 1           | [Reference] |             |
| France                                                                                                                                                                                                                                                                                                                                                                                                                               | 60 / 784   | 1.24        | 0.82        | 1.89        | 25 / 530 | 0.95        | 0.52        | 1.72        | 20 / 247 | 0.95        | 0.49        | 1.83        | 31 / 209 | 1.80        | 0.91        | 3.56        |
| UK                                                                                                                                                                                                                                                                                                                                                                                                                                   | 90 / 433   | <b>2.71</b> | <b>1.79</b> | <b>4.10</b> | 57 / 303 | <b>2.38</b> | <b>1.39</b> | <b>4.07</b> | 45 / 185 | <b>2.34</b> | <b>1.27</b> | <b>4.31</b> | 24 / 103 | <b>3.08</b> | <b>1.48</b> | <b>6.40</b> |
| Italy                                                                                                                                                                                                                                                                                                                                                                                                                                | 52 / 312   | <b>1.87</b> | <b>1.15</b> | <b>3.02</b> | 29 / 196 | 1.65        | 0.84        | 3.24        | 21 / 103 | 1.67        | 0.75        | 3.71        | 22 / 110 | 2.11        | 0.97        | 4.61        |
| Spain                                                                                                                                                                                                                                                                                                                                                                                                                                | 21 / 246   | 1.02        | 0.55        | 1.86        | 10 / 156 | 0.68        | 0.29        | 1.62        | 7 / 88   | 0.50        | 0.19        | 1.31        | 10 / 84  | 1.53        | 0.62        | 3.76        |
| Germany                                                                                                                                                                                                                                                                                                                                                                                                                              | 15 / 198   | 1.02        | 0.54        | 1.94        | 13 / 150 | 1.30        | 0.60        | 2.79        | 10 / 99  | 0.99        | 0.43        | 2.28        | 3 / 41   | 0.76        | 0.22        | 2.59        |
| Missing values imputed via multiple imputation, patient numbers may thus be rounded. Effects significant at level $\alpha=0.05$ are marked in bold. Patients were excluded from a particular analysis if the medication they received provided $\leq 20$ patients for that analysis or if there were no deaths reported for that specific medication.                                                                                |            |             |             |             |          |             |             |             |          |             |             |             |          |             |             |             |
| CI, confidence interval; CTD, connective tissue diseases; CVD, cardiovascular disease; DA, disease activity; DMARD, disease modifying antirheumatic drugs; GC, glucocorticoids; IJD, inflammatory joint diseases; IL, interleukin; JIA, juvenile idiopathic arthritis; N, number; OR, odds ratio; SLE, systemic lupus erythematosus; TNF; tumour necrosis factor; tsDMARD, targeted synthetic disease modifying antirheumatic drugs. |            |             |             |             |          |             |             |             |          |             |             |             |          |             |             |             |

| Supplementary table 10. Multivariable logistic regression analysis of factors associated with COVID-19-related death stratified by age (> 65 years vs. ≤ 65 years) |                    |             |             |             |                   |             |             |             |
|--------------------------------------------------------------------------------------------------------------------------------------------------------------------|--------------------|-------------|-------------|-------------|-------------------|-------------|-------------|-------------|
|                                                                                                                                                                    | > 65 years         |             |             |             | ≤ 65 years        |             |             |             |
| N deaths/patients (%)                                                                                                                                              | 266 / 1140 (23.3%) |             |             |             | 118 / 2565 (4.6%) |             |             |             |
|                                                                                                                                                                    | N deaths/patients  | OR          | 95% CI      |             | N deaths/patients | OR          | 95% CI      |             |
| Male sex (vs. female)                                                                                                                                              | 121 / 437          | <b>1.43</b> | <b>1.09</b> | <b>1.87</b> | 40 / 751          | 1.32        | 0.74        | 2.33        |
| Ever smoked (vs. never)                                                                                                                                            | 105 / 388          | 1.04        | 0.75        | 1.44        | 35 / 534          | <b>1.63</b> | <b>1.02</b> | <b>2.60</b> |
| Comorbidities                                                                                                                                                      |                    |             |             |             |                   |             |             |             |
| Hypertension alone or CVD alone                                                                                                                                    | 103 / 544          | 0.85        | 0.53        | 1.36        | 52 / 627          | <b>2.04</b> | <b>1.38</b> | <b>3.01</b> |
| Hypertension and CVD                                                                                                                                               | 77 / 210           | 1.81        | 0.99        | 3.31        | 12 / 91           | <b>2.16</b> | <b>1.09</b> | <b>4.31</b> |
| Chronic lung disease                                                                                                                                               | 102 / 320          | <b>1.62</b> | <b>1.09</b> | <b>2.40</b> | 35 / 401          | <b>1.79</b> | <b>1.31</b> | <b>2.45</b> |
| Chronic kidney disease                                                                                                                                             | 53 / 158           | 1.43        | 0.75        | 2.75        | 23 / 100          | <b>3.78</b> | <b>2.24</b> | <b>6.37</b> |
| Diabetes mellitus                                                                                                                                                  | 75 / 251           | 1.39        | 0.91        | 2.12        | 21 / 257          | 1.21        | 0.66        | 2.21        |
| Rheumatic disease                                                                                                                                                  |                    |             |             |             |                   |             |             |             |
| Rheumatoid arthritis                                                                                                                                               | 129 / 537          | 1           | [Reference] |             | 40 / 850          | 1           | [Reference] |             |
| Systemic lupus erythematosus                                                                                                                                       | 8 / 47             | 0.54        | 0.26        | 1.11        | 28 / 344          | 1.24        | 0.66        | 2.34        |
| Vasculitis                                                                                                                                                         | 55 / 192           | 0.77        | 0.55        | 1.09        | 12 / 133          | 0.91        | 0.46        | 1.78        |
| Other connective tissue diseases                                                                                                                                   | 32 / 147           | <b>0.66</b> | <b>0.51</b> | <b>0.85</b> | 21 / 326          | 0.75        | 0.37        | 1.54        |
| Psoriasis arthritis                                                                                                                                                | 12 / 85            | 0.73        | 0.52        | 1.03        | 7 / 344           | 0.58        | 0.24        | 1.37        |
| Spondyloarthritis                                                                                                                                                  | 9 / 38             | 0.81        | 0.37        | 1.76        | 6 / 385           | 0.59        | 0.21        | 1.71        |
| Other inflammatory arthritis or non-systemic JIA                                                                                                                   | 8 / 33             | 0.71        | 0.36        | 1.39        | 2 / 76            | 0.67        | 0.31        | 1.44        |
| Other rheumatic diseases (not IJDs / CTDs / vasculitis)                                                                                                            | 17 / 83            | <b>0.45</b> | <b>0.29</b> | <b>0.69</b> | 7 / 146           | 0.58        | 0.25        | 1.33        |
| High/moderate/severe disease activity (DA) vs. remission/low DA                                                                                                    | 59 / 191           | 1.53        | 0.98        | 2.41        | 50 / 531          | <b>2.20</b> | <b>1.38</b> | <b>3.50</b> |

| Medication                                                                                                                                                                                                                                                                                                                                                                                                                                                                                                                                                                                                                                                                                                                                                                                                                     |           |             |             |             |           |             |             |              |
|--------------------------------------------------------------------------------------------------------------------------------------------------------------------------------------------------------------------------------------------------------------------------------------------------------------------------------------------------------------------------------------------------------------------------------------------------------------------------------------------------------------------------------------------------------------------------------------------------------------------------------------------------------------------------------------------------------------------------------------------------------------------------------------------------------------------------------|-----------|-------------|-------------|-------------|-----------|-------------|-------------|--------------|
| Methotrexate                                                                                                                                                                                                                                                                                                                                                                                                                                                                                                                                                                                                                                                                                                                                                                                                                   | 41 / 242  | 1           | [Reference] |             | 6 / 353   | 1           | [Reference] |              |
| No DMARD therapy                                                                                                                                                                                                                                                                                                                                                                                                                                                                                                                                                                                                                                                                                                                                                                                                               | 96 / 352  | <b>2.07</b> | <b>1.45</b> | <b>2.96</b> | 28 / 387  | <b>3.82</b> | <b>1.42</b> | <b>10.27</b> |
| Leflunomide                                                                                                                                                                                                                                                                                                                                                                                                                                                                                                                                                                                                                                                                                                                                                                                                                    | 7 / 38    | 0.98        | 0.38        | 2.55        | 5 / 52    | <b>3.90</b> | <b>1.12</b> | <b>13.61</b> |
| Antimalarials                                                                                                                                                                                                                                                                                                                                                                                                                                                                                                                                                                                                                                                                                                                                                                                                                  | 13 / 113  | 0.68        | 0.38        | 1.21        | 14 / 313  | 2.13        | 0.71        | 6.39         |
| Sulfasalazine                                                                                                                                                                                                                                                                                                                                                                                                                                                                                                                                                                                                                                                                                                                                                                                                                  | 28 / 61   | <b>3.89</b> | <b>1.60</b> | <b>9.48</b> | 5 / 83    | <b>3.22</b> | <b>1.14</b> | <b>9.06</b>  |
| Immunosuppressants                                                                                                                                                                                                                                                                                                                                                                                                                                                                                                                                                                                                                                                                                                                                                                                                             | 18 / 55   | <b>2.74</b> | <b>1.51</b> | <b>4.97</b> | 20 / 221  | 1.90        | 0.70        | 5.20         |
| Rituximab                                                                                                                                                                                                                                                                                                                                                                                                                                                                                                                                                                                                                                                                                                                                                                                                                      | 24 / 52   | <b>3.84</b> | <b>1.93</b> | <b>7.66</b> | 18 / 140  | <b>5.29</b> | <b>1.34</b> | <b>20.85</b> |
| Other b/tsDMARDs                                                                                                                                                                                                                                                                                                                                                                                                                                                                                                                                                                                                                                                                                                                                                                                                               | 39 / 234  | 0.92        | 0.61        | 1.38        | 22 / 1026 | 1.27        | 0.46        | 3.48         |
| Glucocorticoids (GCs)                                                                                                                                                                                                                                                                                                                                                                                                                                                                                                                                                                                                                                                                                                                                                                                                          |           |             |             |             |           |             |             |              |
| No GCs                                                                                                                                                                                                                                                                                                                                                                                                                                                                                                                                                                                                                                                                                                                                                                                                                         | 118 / 606 | 1           | [Reference] |             | 47 / 1811 | 1           | [Reference] |              |
| GCs 1-10mg/d                                                                                                                                                                                                                                                                                                                                                                                                                                                                                                                                                                                                                                                                                                                                                                                                                   | 117 / 443 | 1.19        | 0.84        | 1.70        | 54 / 619  | <b>2.10</b> | <b>1.19</b> | <b>3.71</b>  |
| GCs > 10 mg/d                                                                                                                                                                                                                                                                                                                                                                                                                                                                                                                                                                                                                                                                                                                                                                                                                  | 32 / 91   | 1.35        | 0.79        | 2.31        | 17 / 135  | <b>2.24</b> | <b>1.32</b> | <b>3.79</b>  |
| <p>Missing values imputed via multiple imputation, patient numbers may thus be rounded. Effects significant at level <math>\alpha=0.05</math> are marked in bold. Patients were excluded from a particular analysis if the medication they received provided <math>\leq 20</math> patients for that analysis or if there were no deaths reported for that specific medication.</p> <p>CI, confidence interval; CTD, connective tissue diseases; CVD, cardiovascular disease; DA, disease activity; DMARD, disease modifying antirheumatic drugs; GC, glucocorticoids; IJD, inflammatory joint diseases; IL, interleukin; JIA, juvenile idiopathic arthritis; N, number; OR, odds ratio; SLE, systemic lupus erythematosus; TNF, tumour necrosis factor; tsDMARD, targeted synthetic disease modifying antirheumatic drugs.</p> |           |             |             |             |           |             |             |              |

| Supplementary table 11. Multivariable logistic regression analysis of factors associated with COVID-19-related death stratified by sex |                    |             |             |              |                   |             |             |             |
|----------------------------------------------------------------------------------------------------------------------------------------|--------------------|-------------|-------------|--------------|-------------------|-------------|-------------|-------------|
|                                                                                                                                        | Male sex           |             |             |              | Female sex        |             |             |             |
| N deaths/patients (%)                                                                                                                  | 161 / 1188 (13.6%) |             |             |              | 223 / 2517 (8.9%) |             |             |             |
|                                                                                                                                        | N deaths/patients  | OR          | 95% CI      |              | N deaths/patients | OR          | 95% CI      |             |
| Age, years                                                                                                                             |                    |             |             |              |                   |             |             |             |
| Age ≤ 65                                                                                                                               | 40 / 751           | 1           | [Reference] |              | 78 / 1814         | 1           | [Reference] |             |
| 65 years < Age ≤ 75                                                                                                                    | 55 / 252           | <b>3.81</b> | <b>1.96</b> | <b>7.41</b>  | 54 / 392          | <b>2.65</b> | <b>1.62</b> | <b>4.32</b> |
| Age > 75                                                                                                                               | 66 / 185           | <b>6.80</b> | <b>2.88</b> | <b>16.07</b> | 91 / 311          | <b>6.21</b> | <b>4.50</b> | <b>8.56</b> |
| Ever smoked (vs. never)                                                                                                                | 72 / 399           | 1.08        | 0.62        | 1.91         | 67 / 523          | 1.34        | 0.93        | 1.94        |
| Comorbidities                                                                                                                          |                    |             |             |              |                   |             |             |             |
| Hypertension alone or CVD alone                                                                                                        | 66 / 385           | 1.16        | 0.89        | 1.50         | 89 / 765          | 1.24        | 0.83        | 1.85        |
| Hypertension and CVD                                                                                                                   | 43 / 145           | <b>1.87</b> | <b>1.19</b> | <b>2.95</b>  | 46 / 156          | <b>2.06</b> | <b>1.36</b> | <b>3.13</b> |
| Chronic lung disease                                                                                                                   | 53 / 232           | 1.41        | 0.74        | 2.68         | 84 / 489          | <b>1.95</b> | <b>1.47</b> | <b>2.60</b> |
| Chronic kidney disease                                                                                                                 | 30 / 104           | 1.26        | 0.59        | 2.71         | 46 / 155          | <b>2.03</b> | <b>1.13</b> | <b>3.64</b> |
| Diabetes mellitus                                                                                                                      | 46 / 193           | <b>1.80</b> | <b>1.14</b> | <b>2.86</b>  | 50 / 315          | 1.12        | 0.66        | 1.90        |
| Rheumatic disease                                                                                                                      |                    |             |             |              |                   |             |             |             |
| Rheumatoid arthritis                                                                                                                   | 55 / 347           | 1           | [Reference] |              | 114 / 1040        | 1           | [Reference] |             |
| Systemic lupus erythematosus                                                                                                           | 10 / 47            | 1.91        | 0.81        | 4.50         | 26 / 344          | 0.99        | 0.51        | 1.92        |
| Vasculitis                                                                                                                             | 35 / 138           | 0.95        | 0.33        | 2.69         | 32 / 187          | 0.69        | 0.39        | 1.24        |
| Other connective tissue diseases                                                                                                       | 21 / 121           | 0.96        | 0.55        | 1.68         | 32 / 352          | 0.66        | 0.44        | 1.01        |
| Psoriasis arthritis                                                                                                                    | 13 / 200           | 0.95        | 0.50        | 1.83         | 6 / 229           | <b>0.43</b> | <b>0.27</b> | <b>0.70</b> |
| Spondyloarthritis                                                                                                                      | 10 / 202           | 0.82        | 0.29        | 2.31         | 5 / 221           | 0.53        | 0.17        | 1.64        |
| Other inflammatory arthritis or non-systemic JIA                                                                                       | 3 / 35             | 0.41        | 0.07        | 2.31         | 7 / 74            | 1.19        | 0.55        | 2.58        |



|                                                                                                                                                                                                                                                                                                                                                                                                                                      |          |             |             |              |           |             |             |             |
|--------------------------------------------------------------------------------------------------------------------------------------------------------------------------------------------------------------------------------------------------------------------------------------------------------------------------------------------------------------------------------------------------------------------------------------|----------|-------------|-------------|--------------|-----------|-------------|-------------|-------------|
| Other rheumatic diseases (not IJDs / CTDs / vasculitis)                                                                                                                                                                                                                                                                                                                                                                              | 16 / 112 | <b>0.49</b> | <b>0.30</b> | <b>0.79</b>  | 8 / 117   | <b>0.50</b> | <b>0.29</b> | <b>0.89</b> |
| High/moderate/severe disease activity (DA) vs. remission/low DA                                                                                                                                                                                                                                                                                                                                                                      | 34 / 204 | <b>1.69</b> | <b>1.18</b> | <b>2.42</b>  | 75 / 518  | <b>1.99</b> | <b>1.16</b> | <b>3.41</b> |
| Medication                                                                                                                                                                                                                                                                                                                                                                                                                           |          |             |             |              |           |             |             |             |
| Methotrexate                                                                                                                                                                                                                                                                                                                                                                                                                         | 23 / 206 | 1           | [Reference] |              | 24 / 389  | 1           | [Reference] |             |
| No DMARD therapy                                                                                                                                                                                                                                                                                                                                                                                                                     | 61 / 280 | <b>2.25</b> | <b>1.16</b> | <b>4.37</b>  | 63 / 459  | <b>2.19</b> | <b>1.13</b> | <b>4.24</b> |
| Leflunomide                                                                                                                                                                                                                                                                                                                                                                                                                          | 5 / 28   | 1.57        | 0.82        | 3.02         | 7 / 62    | 1.79        | 0.82        | 3.89        |
| Antimalarials                                                                                                                                                                                                                                                                                                                                                                                                                        | 61 / 280 | 0.86        | 0.36        | 2.04         | 63 / 459  | 1.19        | 0.66        | 2.15        |
| Sulfasalazine                                                                                                                                                                                                                                                                                                                                                                                                                        | 16 / 52  | <b>4.71</b> | <b>1.92</b> | <b>11.54</b> | 17 / 92   | 3.26        | 0.93        | 11.40       |
| Immunosuppressants                                                                                                                                                                                                                                                                                                                                                                                                                   | 14 / 79  | <b>2.02</b> | <b>1.15</b> | <b>3.54</b>  | 24 / 197  | <b>2.41</b> | <b>1.20</b> | <b>4.82</b> |
| Rituximab                                                                                                                                                                                                                                                                                                                                                                                                                            | 16 / 60  | <b>3.09</b> | <b>1.03</b> | <b>9.30</b>  | 26 / 132  | <b>5.40</b> | <b>3.06</b> | <b>9.52</b> |
| Other b/tsDMARDs                                                                                                                                                                                                                                                                                                                                                                                                                     | 19 / 425 | 0.64        | 0.37        | 1.10         | 42 / 835  | 1.34        | 0.75        | 2.39        |
| Glucocorticoids (GCs)                                                                                                                                                                                                                                                                                                                                                                                                                |          |             |             |              |           |             |             |             |
| No GCs                                                                                                                                                                                                                                                                                                                                                                                                                               | 76 / 781 | 1           | [Reference] |              | 89 / 1636 | 1           | [Reference] |             |
| GCs 1-10mg/d                                                                                                                                                                                                                                                                                                                                                                                                                         | 65 / 319 | 1.07        | 0.61        | 1.87         | 105 / 744 | <b>1.71</b> | <b>1.17</b> | <b>2.52</b> |
| GCs > 10 mg/d                                                                                                                                                                                                                                                                                                                                                                                                                        | 20 / 88  | 1.20        | 0.67        | 2.17         | 29 / 138  | <b>2.23</b> | <b>1.34</b> | <b>3.73</b> |
| Missing values imputed via multiple imputation, patient numbers may thus be rounded. Effects significant at level $\alpha=0.05$ are marked in bold. Patients were excluded from a particular analysis if the medication they received provided $\leq 20$ patients for that analysis or if there were no deaths reported for that specific medication.                                                                                |          |             |             |              |           |             |             |             |
| CI, confidence interval; CTD, connective tissue diseases; CVD, cardiovascular disease; DA, disease activity; DMARD, disease modifying antirheumatic drugs; GC, glucocorticoids; IJD, inflammatory joint diseases; IL, interleukin; JIA, juvenile idiopathic arthritis; N, number; OR, odds ratio; SLE, systemic lupus erythematosus; TNF, tumour necrosis factor; tsDMARD, targeted synthetic disease modifying antirheumatic drugs. |          |             |             |              |           |             |             |             |

| Supplementary table 12. Multivariable logistic regression analysis of factors associated with COVID-19-related death stratified by smoking habits |                   |             |             |              |                   |             |             |             |
|---------------------------------------------------------------------------------------------------------------------------------------------------|-------------------|-------------|-------------|--------------|-------------------|-------------|-------------|-------------|
|                                                                                                                                                   | Ever smoked       |             |             |              | Never smoked      |             |             |             |
| N deaths/patients (%)                                                                                                                             | 140 / 922 (15.2%) |             |             |              | 244 / 2783 (8.8%) |             |             |             |
|                                                                                                                                                   | N deaths/patients | OR          | 95% CI      |              | N deaths/patients | OR          | 95% CI      |             |
| Age, years                                                                                                                                        |                   |             |             |              |                   |             |             |             |
| Age ≤ 65                                                                                                                                          | 35 / 534          | 1           | [Reference] |              | 83 / 2031         | 1           | [Reference] |             |
| 65 years < Age ≤ 75                                                                                                                               | 47 / 226          | <b>2.79</b> | <b>1.70</b> | <b>4.58</b>  | 62 / 418          | <b>3.18</b> | <b>2.06</b> | <b>4.91</b> |
| Age > 75                                                                                                                                          | 58 / 162          | <b>6.43</b> | <b>3.33</b> | <b>12.42</b> | 99 / 334          | <b>6.33</b> | <b>4.32</b> | <b>9.27</b> |
| Male sex (vs. female)                                                                                                                             | 72 / 399          | 1.30        | 0.72        | 2.35         | 89 / 789          | <b>1.46</b> | <b>1.14</b> | <b>1.88</b> |
| Comorbidities                                                                                                                                     |                   |             |             |              |                   |             |             |             |
| Hypertension alone or CVD alone                                                                                                                   | 57 / 338          | 1.01        | 0.67        | 1.50         | 98 / 812          | 1.32        | 0.94        | 1.86        |
| Hypertension and CVD                                                                                                                              | 36 / 124          | 1.53        | 0.84        | 2.79         | 52 / 177          | <b>2.08</b> | <b>1.32</b> | <b>3.27</b> |
| Chronic lung disease                                                                                                                              | 62 / 271          | 1.49        | 0.78        | 2.84         | 74 / 450          | <b>1.93</b> | <b>1.45</b> | <b>2.58</b> |
| Chronic kidney disease                                                                                                                            | 21 / 87           | 0.74        | 0.38        | 1.42         | 55 / 172          | <b>2.72</b> | <b>1.56</b> | <b>4.73</b> |
| Diabetes mellitus                                                                                                                                 | 39 / 158          | 1.48        | 0.80        | 2.74         | 57 / 350          | 1.33        | 0.79        | 2.22        |
| Rheumatic disease                                                                                                                                 |                   |             |             |              |                   |             |             |             |
| Rheumatoid arthritis                                                                                                                              | 71 / 388          | 1           | [Reference] |              | 98 / 999          | 1           | [Reference] |             |
| Systemic lupus erythematosus                                                                                                                      | 11 / 62           | 1.30        | 0.60        | 2.84         | 26 / 329          | 1.12        | 0.64        | 1.94        |
| Vasculitis                                                                                                                                        | 18 / 90           | <b>0.42</b> | <b>0.19</b> | <b>0.92</b>  | 49 / 235          | 0.96        | 0.67        | 1.37        |
| Other connective tissue diseases                                                                                                                  | 16 / 103          | 0.71        | 0.34        | 1.48         | 37 / 370          | 0.68        | 0.42        | 1.10        |
| Psoriasis arthritis                                                                                                                               | 6 / 111           | 0.60        | 0.24        | 1.54         | 13 / 318          | 0.70        | 0.44        | 1.12        |
| Spondyloarthritis                                                                                                                                 | 3 / 80            | 0.32        | 0.08        | 1.29         | 12 / 343          | 0.82        | 0.37        | 1.85        |
| Other inflammatory arthritis or non-systemic JIA                                                                                                  | 5 / 27            | 0.65        | 0.21        | 2.02         | 5 / 82            | 0.84        | 0.44        | 1.58        |

|                                                                                                                                                                                                                                                                                                                                                                                                                                      |          |             |             |              |           |             |             |             |
|--------------------------------------------------------------------------------------------------------------------------------------------------------------------------------------------------------------------------------------------------------------------------------------------------------------------------------------------------------------------------------------------------------------------------------------|----------|-------------|-------------|--------------|-----------|-------------|-------------|-------------|
| Other rheumatic diseases (not IJDs / CTDs / vasculitis)                                                                                                                                                                                                                                                                                                                                                                              | 12 / 73  | 0.59        | 0.26        | 1.31         | 12 / 156  | <b>0.40</b> | <b>0.25</b> | <b>0.66</b> |
| High/moderate/severe disease activity (DA) vs. remission/low DA                                                                                                                                                                                                                                                                                                                                                                      | 32 / 171 | 1.45        | 0.85        | 2.45         | 77 / 551  | 2.11        | 1.31        | 3.40        |
| Medication                                                                                                                                                                                                                                                                                                                                                                                                                           |          |             |             |              |           |             |             |             |
| Methotrexate                                                                                                                                                                                                                                                                                                                                                                                                                         | 15 / 145 | 1           |             | [Reference]  | 33 / 450  | 1           |             | [Reference] |
| No DMARD therapy                                                                                                                                                                                                                                                                                                                                                                                                                     | 43 / 221 | <b>2.35</b> | <b>1.15</b> | <b>4.83</b>  | 82 / 518  | <b>2.18</b> | <b>1.43</b> | <b>3.30</b> |
| Leflunomide                                                                                                                                                                                                                                                                                                                                                                                                                          | 5 / 21   | 1.41        | 0.39        | 5.12         | 8 / 69    | 1.52        | 0.68        | 3.39        |
| Antimalarials                                                                                                                                                                                                                                                                                                                                                                                                                        | 13 / 93  | 1.52        | 0.68        | 3.38         | 14 / 334  | 0.75        | 0.46        | 1.21        |
| Sulfasalazine                                                                                                                                                                                                                                                                                                                                                                                                                        | 21 / 56  | <b>6.15</b> | <b>2.23</b> | <b>16.94</b> | 12 / 89   | 2.16        | 0.81        | 5.73        |
| Immunosuppressants                                                                                                                                                                                                                                                                                                                                                                                                                   | 12 / 55  | <b>3.89</b> | <b>1.53</b> | <b>9.85</b>  | 26 / 221  | 1.76        | 0.96        | 3.23        |
| Rituximab                                                                                                                                                                                                                                                                                                                                                                                                                            | 12 / 46  | <b>3.95</b> | <b>1.29</b> | <b>12.10</b> | 30 / 146  | <b>4.14</b> | <b>2.16</b> | <b>7.93</b> |
| Other b/tsDMARDs                                                                                                                                                                                                                                                                                                                                                                                                                     | 20 / 289 | 1.04        | 0.48        | 2.26         | 41 / 971  | 0.90        | 0.59        | 1.35        |
| Glucocorticoids (GCs)                                                                                                                                                                                                                                                                                                                                                                                                                |          |             |             |              |           |             |             |             |
| No GCs                                                                                                                                                                                                                                                                                                                                                                                                                               | 67 / 604 | 1           |             | [Reference]  | 98 / 1813 | 1           |             | [Reference] |
| GCs 1-10mg/d                                                                                                                                                                                                                                                                                                                                                                                                                         | 57 / 260 | 1.52        | 0.91        | 2.53         | 114 / 802 | 1.35        | 0.88        | 2.05        |
| GCs > 10 mg/d                                                                                                                                                                                                                                                                                                                                                                                                                        | 16 / 57  | <b>2.53</b> | <b>1.33</b> | <b>4.80</b>  | 33 / 168  | 1.48        | 0.93        | 2.35        |
| Missing values imputed via multiple imputation, patient numbers may thus be rounded. Effects significant at level $\alpha=0.05$ are marked in bold. Patients were excluded from a particular analysis if the medication they received provided $\leq 20$ patients for that analysis or if there were no deaths reported for that specific medication.                                                                                |          |             |             |              |           |             |             |             |
| CI, confidence interval; CTD, connective tissue diseases; CVD, cardiovascular disease; DA, disease activity; DMARD, disease modifying antirheumatic drugs; GC, glucocorticoids; IJD, inflammatory joint diseases; IL, interleukin; JIA, juvenile idiopathic arthritis; N, number; OR, odds ratio; SLE, systemic lupus erythematosus; TNF, tumour necrosis factor; tsDMARD, targeted synthetic disease modifying antirheumatic drugs. |          |             |             |              |           |             |             |             |

| Supplementary table 13. Multivariable logistic regression analysis of factors associated with COVID-19-related death stratified by heart disease (hypertension and/or cardiovascular disease) |                    |             |             |             |                    |             |             |              |
|-----------------------------------------------------------------------------------------------------------------------------------------------------------------------------------------------|--------------------|-------------|-------------|-------------|--------------------|-------------|-------------|--------------|
|                                                                                                                                                                                               | Heart disease      |             |             |             | No heart disease   |             |             |              |
| N deaths/patients (%)                                                                                                                                                                         | 242 / 1439 (16.8%) |             |             |             | 384 / 3705 (10.4%) |             |             |              |
|                                                                                                                                                                                               | N deaths/patients  | OR          | 95% CI      |             | N deaths/patients  | OR          | 95% CI      |              |
| Age, years                                                                                                                                                                                    |                    |             |             |             |                    |             |             |              |
| Age ≤ 65                                                                                                                                                                                      | 63 / 711           | 1           | [Reference] |             | 53 / 1833          | 1           | [Reference] |              |
| 65 years < Age ≤ 75                                                                                                                                                                           | 58 / 367           | <b>1.68</b> | <b>1.12</b> | <b>2.52</b> | 49 / 270           | <b>5.98</b> | <b>3.72</b> | <b>9.63</b>  |
| Age > 75                                                                                                                                                                                      | 121 / 361          | <b>4.77</b> | <b>3.08</b> | <b>7.40</b> | 36 / 134           | <b>7.65</b> | <b>5.24</b> | <b>11.16</b> |
| Male sex (vs. female)                                                                                                                                                                         | 108 / 525          | <b>1.59</b> | <b>1.23</b> | <b>2.06</b> | 51 / 655           | 1.25        | 0.76        | 2.05         |
| Ever smoked (vs. never)                                                                                                                                                                       | 93 / 458           | 1.13        | 0.82        | 1.56        | 46 / 457           | 1.48        | 0.94        | 2.34         |
| Comorbidities                                                                                                                                                                                 |                    |             |             |             |                    |             |             |              |
| Chronic lung disease                                                                                                                                                                          | 84 / 352           | <b>1.56</b> | <b>1.15</b> | <b>2.12</b> | 51 / 362           | <b>2.39</b> | <b>1.77</b> | <b>3.24</b>  |
| Chronic kidney disease                                                                                                                                                                        | 58 / 190           | 1.58        | 0.94        | 2.67        | 18 / 67            | <b>2.83</b> | <b>1.04</b> | <b>7.71</b>  |
| Diabetes mellitus                                                                                                                                                                             | 75 / 358           | 1.33        | 0.84        | 2.12        | 20 / 145           | <b>1.85</b> | <b>1.38</b> | <b>2.48</b>  |
| Rheumatic disease                                                                                                                                                                             |                    |             |             |             |                    |             |             |              |
| Rheumatoid arthritis                                                                                                                                                                          | 105 / 572          | 1           | [Reference] |             | 63 / 805           | 1           | [Reference] |              |
| Systemic lupus erythematosus                                                                                                                                                                  | 24 / 154           | 1.16        | 0.55        | 2.46        | 11 / 235           | 1.04        | 0.54        | 2.02         |
| Vasculitis                                                                                                                                                                                    | 39 / 168           | 0.61        | 0.36        | 1.01        | 27 / 155           | 1.12        | 0.69        | 1.81         |
| Other connective tissue diseases                                                                                                                                                              | 36 / 201           | 0.79        | 0.60        | 1.02        | 16 / 264           | 0.59        | 0.31        | 1.12         |
| Psoriasis arthritis                                                                                                                                                                           | 13 / 152           | 0.70        | 0.45        | 1.10        | 6 / 273            | 0.60        | 0.30        | 1.19         |
| Spondyloarthritis                                                                                                                                                                             | 6 / 87             | 0.51        | 0.17        | 1.51        | 9 / 336            | 0.87        | 0.43        | 1.74         |
| Other inflammatory arthritis or non-systemic JIA                                                                                                                                              | 8 / 34             | 1.30        | 0.66        | 2.55        | 2 / 73             | 0.48        | 0.14        | 1.70         |

|                                                                                                                                                                                                                                                                                                                                                                                                                                      |           |             |             |             |           |             |             |              |
|--------------------------------------------------------------------------------------------------------------------------------------------------------------------------------------------------------------------------------------------------------------------------------------------------------------------------------------------------------------------------------------------------------------------------------------|-----------|-------------|-------------|-------------|-----------|-------------|-------------|--------------|
| Other rheumatic diseases (not IJDs / CTDs / vasculitis)                                                                                                                                                                                                                                                                                                                                                                              | 16 / 100  | <b>0.45</b> | <b>0.30</b> | <b>0.68</b> | 8 / 128   | 0.54        | 0.19        | 1.51         |
| High/moderate/severe disease activity (DA) vs. remission/low DA                                                                                                                                                                                                                                                                                                                                                                      | 66 / 283  | <b>1.92</b> | <b>1.01</b> | <b>3.63</b> | 42 / 432  | <b>1.92</b> | <b>1.31</b> | <b>2.83</b>  |
| Medication                                                                                                                                                                                                                                                                                                                                                                                                                           |           |             |             |             |           |             |             |              |
| Methotrexate                                                                                                                                                                                                                                                                                                                                                                                                                         | 14 / 352  | 1           | [Reference] | [Reference] | 33 / 238  | 1           | [Reference] | [Reference]  |
| No DMARD therapy                                                                                                                                                                                                                                                                                                                                                                                                                     | 91 / 372  | <b>2.14</b> | <b>1.37</b> | <b>3.35</b> | 32 / 361  | <b>2.09</b> | <b>1.10</b> | <b>3.97</b>  |
| Leflunomide                                                                                                                                                                                                                                                                                                                                                                                                                          | 5 / 40    | 0.79        | 0.24        | 2.61        | 7 / 49    | <b>3.49</b> | <b>1.23</b> | <b>9.89</b>  |
| Antimalarials                                                                                                                                                                                                                                                                                                                                                                                                                        | 20 / 168  | 1.10        | 0.62        | 1.96        | 6 / 254   | 0.64        | 0.25        | 1.69         |
| Sulfasalazine                                                                                                                                                                                                                                                                                                                                                                                                                        | 18 / 64   | <b>2.78</b> | <b>1.08</b> | <b>7.15</b> | 14 / 77   | <b>4.82</b> | <b>1.92</b> | <b>12.08</b> |
| Immunosuppressants                                                                                                                                                                                                                                                                                                                                                                                                                   | 21 / 117  | <b>1.82</b> | <b>1.02</b> | <b>3.23</b> | 17 / 158  | 2.25        | 0.79        | 6.38         |
| Rituximab                                                                                                                                                                                                                                                                                                                                                                                                                            | 19 / 68   | <b>2.49</b> | <b>1.25</b> | <b>4.96</b> | 22 / 121  | <b>5.86</b> | <b>2.34</b> | <b>14.68</b> |
| Other b/tsDMARDs                                                                                                                                                                                                                                                                                                                                                                                                                     | 35 / 377  | 0.96        | 0.59        | 1.54        | 26 / 877  | 1.08        | 0.53        | 2.20         |
| Glucocorticoids (GCs)                                                                                                                                                                                                                                                                                                                                                                                                                |           |             |             |             |           |             |             |              |
| No GCs                                                                                                                                                                                                                                                                                                                                                                                                                               | 96 / 816  | 1           | [Reference] | [Reference] | 69 / 1584 | 1           | [Reference] | [Reference]  |
| GCs 1-10mg/d                                                                                                                                                                                                                                                                                                                                                                                                                         | 114 / 510 | <b>1.62</b> | <b>1.02</b> | <b>2.56</b> | 53 / 541  | 1.16        | 0.65        | 2.07         |
| GCs > 10 mg/d                                                                                                                                                                                                                                                                                                                                                                                                                        | 32 / 112  | <b>1.84</b> | <b>1.20</b> | <b>2.82</b> | 17 / 112  | 1.62        | 0.91        | 2.87         |
| Missing values imputed via multiple imputation, patient numbers may thus be rounded. Effects significant at level $\alpha=0.05$ are marked in bold. Patients were excluded from a particular analysis if the medication they received provided $\leq 20$ patients for that analysis or if there were no deaths reported for that specific medication.                                                                                |           |             |             |             |           |             |             |              |
| CI, confidence interval; CTD, connective tissue diseases; CVD, cardiovascular disease; DA, disease activity; DMARD, disease modifying antirheumatic drugs; GC, Glucocorticoids; IJD, inflammatory joint diseases; IL, interleukin; JIA, juvenile idiopathic arthritis; N, number; OR, odds ratio; SLE, Systemic lupus erythematosus; TNF, tumour necrosis factor; tsDMARD, targeted synthetic disease modifying antirheumatic drugs. |           |             |             |             |           |             |             |              |

| Supplementary table 14. Multivariable logistic regression analysis of factors associated with COVID-19-related death stratified by chronic lung disease |                      |             |             |              |                         |             |             |             |
|---------------------------------------------------------------------------------------------------------------------------------------------------------|----------------------|-------------|-------------|--------------|-------------------------|-------------|-------------|-------------|
|                                                                                                                                                         | Chronic lung disease |             |             |              | No chronic lung disease |             |             |             |
| N deaths/patients (%)                                                                                                                                   | 136 / 721 (18.9%)    |             |             |              | 248 / 2984 (8.3%)       |             |             |             |
|                                                                                                                                                         | N deaths/patients    | OR          | 95% CI      |              | N deaths/patients       | OR          | 95% CI      |             |
| Age, years                                                                                                                                              |                      |             |             |              |                         |             |             |             |
| Age ≤ 65                                                                                                                                                | 35 / 401             | 1           | [Reference] |              | 84 / 2164               | 1           | [Reference] |             |
| 65 years < Age ≤ 75                                                                                                                                     | 48 / 189             | <b>3.58</b> | <b>2.40</b> | <b>5.33</b>  | 61 / 456                | <b>3.08</b> | <b>2.18</b> | <b>4.36</b> |
| Age > 75                                                                                                                                                | 54 / 131             | <b>8.34</b> | <b>6.29</b> | <b>11.05</b> | 103 / 365               | <b>5.82</b> | <b>3.43</b> | <b>9.90</b> |
| Male sex (vs. female)                                                                                                                                   | 53 / 232             | 1.02        | 0.47        | 2.22         | 108 / 956               | <b>1.60</b> | <b>1.24</b> | <b>2.07</b> |
| Ever smoked (vs. never)                                                                                                                                 | 62 / 271             | 1.23        | 0.68        | 2.24         | 77 / 651                | 1.24        | 0.93        | 1.66        |
| Comorbidities                                                                                                                                           |                      |             |             |              |                         |             |             |             |
| Hypertension alone or CVD alone                                                                                                                         | 51 / 260             | 0.92        | 0.67        | 1.27         | 104 / 890               | <b>1.43</b> | <b>1.05</b> | <b>1.94</b> |
| Hypertension and CVD                                                                                                                                    | 34 / 97              | 1.51        | 0.84        | 2.73         | 55 / 204                | <b>2.21</b> | <b>1.50</b> | <b>3.27</b> |
| Chronic kidney disease                                                                                                                                  | 21 / 64              | 0.96        | 0.32        | 2.82         | 55 / 194                | <b>2.04</b> | <b>1.22</b> | <b>3.43</b> |
| Diabetes mellitus                                                                                                                                       | 38 / 140             | 1.40        | 0.61        | 3.21         | 58 / 368                | <b>1.44</b> | <b>1.05</b> | <b>1.96</b> |
| Rheumatic disease                                                                                                                                       |                      |             |             |              |                         |             |             |             |
| Rheumatoid arthritis                                                                                                                                    | 65 / 298             | 1           | [Reference] |              | 104 / 1089              | 1           | [Reference] |             |
| Systemic lupus erythematosus                                                                                                                            | 5 / 58               | 0.55        | 0.18        | 1.66         | 31 / 333                | 1.42        | 0.81        | 2.50        |
| Vasculitis                                                                                                                                              | 18 / 66              | 0.87        | 0.44        | 1.72         | 49 / 259                | 0.75        | 0.57        | 1.00        |
| Other connective tissue diseases                                                                                                                        | 35 / 169             | 1.21        | 0.66        | 2.19         | 19 / 304                | <b>0.46</b> | <b>0.30</b> | <b>0.71</b> |
| Psoriasis arthritis                                                                                                                                     | 4 / 44               | 1.19        | 0.45        | 3.14         | 15 / 385                | <b>0.54</b> | <b>0.40</b> | <b>0.75</b> |
| Spondyloarthritis                                                                                                                                       | 4 / 49               | 0.81        | 0.43        | 1.55         | 11 / 374                | 0.60        | 0.26        | 1.35        |
| Other inflammatory arthritis or non-systemic JIA                                                                                                        | 4 / 16               | 1.61        | 0.53        | 4.85         | 6 / 94                  | 0.55        | 0.26        | 1.19        |

|                                                                                                                                                                                                                                                                                                                                                                                                                                      |          |             |             |              |            |             |             |             |
|--------------------------------------------------------------------------------------------------------------------------------------------------------------------------------------------------------------------------------------------------------------------------------------------------------------------------------------------------------------------------------------------------------------------------------------|----------|-------------|-------------|--------------|------------|-------------|-------------|-------------|
| Other rheumatic diseases (not IJDs / CTDs / vasculitis)                                                                                                                                                                                                                                                                                                                                                                              | 6 / 40   | 0.73        | 0.24        | 2.21         | 18 / 189   | <b>0.40</b> | <b>0.24</b> | <b>0.69</b> |
| High/moderate/severe disease activity (DA) vs. remission/low DA                                                                                                                                                                                                                                                                                                                                                                      | 43 / 173 | <b>1.70</b> | <b>1.01</b> | <b>2.87</b>  | 66 / 549   | <b>1.97</b> | <b>1.27</b> | <b>3.04</b> |
| Medication                                                                                                                                                                                                                                                                                                                                                                                                                           |          |             |             |              |            |             |             |             |
| Methotrexate                                                                                                                                                                                                                                                                                                                                                                                                                         | 16 / 110 | 1           |             | [Reference]  | 31 / 485   | 1           |             | [Reference] |
| No DMARD therapy                                                                                                                                                                                                                                                                                                                                                                                                                     | 35 / 138 | <b>2.28</b> | <b>1.31</b> | <b>3.95</b>  | 89 / 601   | <b>2.17</b> | <b>1.39</b> | <b>3.39</b> |
| Leflunomide                                                                                                                                                                                                                                                                                                                                                                                                                          | 5 / 23   | <b>2.21</b> | <b>1.21</b> | <b>4.03</b>  | 7 / 67     | 1.44        | 0.68        | 3.07        |
| Antimalarials                                                                                                                                                                                                                                                                                                                                                                                                                        | 12 / 78  | 2.03        | 0.68        | 6.06         | 15 / 348   | 0.73        | 0.38        | 1.41        |
| Sulfasalazine                                                                                                                                                                                                                                                                                                                                                                                                                        | 10 / 33  | <b>2.97</b> | <b>1.19</b> | <b>7.39</b>  | 23 / 111   | <b>4.20</b> | <b>1.83</b> | <b>9.65</b> |
| Immunosuppressants                                                                                                                                                                                                                                                                                                                                                                                                                   | 17 / 93  | <b>2.74</b> | <b>1.99</b> | <b>3.78</b>  | 21 / 183   | 1.68        | 0.86        | 3.28        |
| Rituximab                                                                                                                                                                                                                                                                                                                                                                                                                            | 20 / 65  | <b>4.95</b> | <b>1.59</b> | <b>15.39</b> | 23 / 127   | <b>4.08</b> | <b>1.99</b> | <b>8.39</b> |
| Other b/tsDMARDs                                                                                                                                                                                                                                                                                                                                                                                                                     | 21 / 183 | 1.22        | 0.69        | 2.16         | 40 / 1077  | 0.90        | 0.52        | 1.54        |
| Glucocorticoids (GCs)                                                                                                                                                                                                                                                                                                                                                                                                                |          |             |             |              |            |             |             |             |
| No GCs                                                                                                                                                                                                                                                                                                                                                                                                                               | 52 / 406 | 1           |             | [Reference]  | 113 / 2012 | 1           |             | [Reference] |
| GCs 1-10mg/d                                                                                                                                                                                                                                                                                                                                                                                                                         | 68 / 258 | <b>1.95</b> | <b>1.30</b> | <b>2.91</b>  | 103 / 804  | 1.23        | 0.77        | 1.95        |
| GCs > 10 mg/d                                                                                                                                                                                                                                                                                                                                                                                                                        | 17 / 58  | 1.70        | 0.96        | 3.00         | 32 / 168   | 1.65        | 0.93        | 2.92        |
| Missing values imputed via multiple imputation, patient numbers may thus be rounded. Effects significant at level $\alpha=0.05$ are marked in bold. Patients were excluded from a particular analysis if the medication they received provided $\leq 20$ patients for that analysis or if there were no deaths reported for that specific medication.                                                                                |          |             |             |              |            |             |             |             |
| CI, confidence interval; CTD, connective tissue diseases; CVD, cardiovascular disease; DA, disease activity; DMARD, disease modifying antirheumatic drugs; GC, glucocorticoids; IJD, inflammatory joint diseases; IL, interleukin; JIA, juvenile idiopathic arthritis; N, number; OR, odds ratio; SLE, systemic lupus erythematosus; TNF, tumour necrosis factor; tsDMARD, targeted synthetic disease modifying antirheumatic drugs. |          |             |             |              |            |             |             |             |

| Supplementary table 15. Multivariable logistic regression analysis of factors associated with COVID-19-related death stratified by disease activity |                                    |             |             |             |                                  |             |             |              |
|-----------------------------------------------------------------------------------------------------------------------------------------------------|------------------------------------|-------------|-------------|-------------|----------------------------------|-------------|-------------|--------------|
|                                                                                                                                                     | Moderate / severe disease activity |             |             |             | Low disease activity / remission |             |             |              |
| N deaths/patients (%)                                                                                                                               | 109 / 722 (15.1%)                  |             |             |             | 275 / 2983 (9.2%)                |             |             |              |
|                                                                                                                                                     | N deaths/patients                  | OR          | 95% CI      |             | N deaths/patients                | OR          | 95% CI      |              |
| Age, years                                                                                                                                          |                                    |             |             |             |                                  |             |             |              |
| Age ≤ 65                                                                                                                                            | 50 / 531                           | 1           | [Reference] |             | 69 / 2035                        | 1           | [Reference] |              |
| 65 years < Age ≤ 75                                                                                                                                 | 30 / 120                           | <b>2.52</b> | <b>1.22</b> | <b>5.23</b> | 80 / 524                         | <b>3.47</b> | <b>2.40</b> | <b>5.01</b>  |
| Age > 75                                                                                                                                            | 30 / 72                            | <b>3.92</b> | <b>1.99</b> | <b>7.74</b> | 127 / 424                        | <b>7.50</b> | <b>4.65</b> | <b>12.08</b> |
| Male sex (vs. female)                                                                                                                               | 34 / 204                           | 1.18        | 0.62        | 2.22        | 127 / 984                        | <b>1.50</b> | <b>1.15</b> | <b>1.97</b>  |
| Ever smoked (vs. never)                                                                                                                             | 32 / 171                           | 1.09        | 0.64        | 1.86        | 108 / 751                        | 1.25        | 0.92        | 1.70         |
| Comorbidities                                                                                                                                       |                                    |             |             |             |                                  |             |             |              |
| Hypertension alone or CVD alone                                                                                                                     | 43 / 227                           | 1.32        | 0.70        | 2.49        | 112 / 923                        | 1.17        | 0.88        | 1.55         |
| Hypertension and CVD                                                                                                                                | 24 / 59                            | <b>3.26</b> | <b>1.33</b> | <b>8.03</b> | 65 / 242                         | <b>1.71</b> | <b>1.08</b> | <b>2.73</b>  |
| Chronic lung disease                                                                                                                                | 43 / 173                           | <b>1.78</b> | <b>1.20</b> | <b>2.64</b> | 93 / 548                         | <b>1.69</b> | <b>1.16</b> | <b>2.46</b>  |
| Chronic kidney disease                                                                                                                              | 30 / 61                            | <b>3.62</b> | <b>1.81</b> | <b>7.25</b> | 47 / 197                         | 1.18        | 0.58        | 2.39         |
| Diabetes mellitus                                                                                                                                   | 25 / 115                           | 0.85        | 0.39        | 1.84        | 71 / 393                         | <b>1.57</b> | <b>1.03</b> | <b>2.39</b>  |
| Rheumatic disease                                                                                                                                   |                                    |             |             |             |                                  |             |             |              |
| Rheumatoid arthritis                                                                                                                                | 46 / 283                           | 1           | [Reference] |             | 123 / 1104                       | 1           | [Reference] |              |
| Systemic lupus erythematosus                                                                                                                        | 17 / 77                            | 1.42        | 0.59        | 3.41        | 19 / 315                         | 0.96        | 0.57        | 1.59         |
| Vasculitis                                                                                                                                          | 18 / 52                            | 1.32        | 0.59        | 2.92        | 49 / 273                         | 0.68        | 0.44        | 1.04         |
| Other connective tissue diseases                                                                                                                    | 21 / 108                           | 1.17        | 0.59        | 2.29        | 32 / 365                         | <b>0.63</b> | <b>0.45</b> | <b>0.88</b>  |
| Psoriasis arthritis                                                                                                                                 | 5 / 79                             | 0.53        | 0.16        | 1.77        | 15 / 350                         | 0.72        | 0.41        | 1.27         |
| Spondyloarthritis                                                                                                                                   | 3 / 79                             | 0.45        | 0.15        | 1.34        | 12 / 344                         | 0.77        | 0.30        | 1.97         |
| Other inflammatory arthritis or non-systemic JIA                                                                                                    | 1 / 19                             | 0.68        | 0.10        | 4.50        | 9 / 90                           | 0.77        | 0.40        | 1.49         |



|                                                                                                                                                                                                                                                                                                                                                                                                                                      |          |             |             |              |            |             |             |             |
|--------------------------------------------------------------------------------------------------------------------------------------------------------------------------------------------------------------------------------------------------------------------------------------------------------------------------------------------------------------------------------------------------------------------------------------|----------|-------------|-------------|--------------|------------|-------------|-------------|-------------|
| Other rheumatic diseases (not IJDs / CTDs / vasculitis)                                                                                                                                                                                                                                                                                                                                                                              | 1 / 45   | 0.01        | 0.00        | 1834.66      | 23 / 184   | <b>0.64</b> | <b>0.46</b> | <b>0.88</b> |
| Medication                                                                                                                                                                                                                                                                                                                                                                                                                           |          |             |             |              |            |             |             |             |
| Methotrexate                                                                                                                                                                                                                                                                                                                                                                                                                         | 5 / 92   | 1           | [Reference] |              | 42 / 503   | 1           | [Reference] |             |
| No DMARD therapy                                                                                                                                                                                                                                                                                                                                                                                                                     | 27 / 134 | <b>4.64</b> | <b>1.64</b> | <b>13.15</b> | 97 / 605   | <b>1.93</b> | <b>1.33</b> | <b>2.78</b> |
| Leflunomide                                                                                                                                                                                                                                                                                                                                                                                                                          | 6 / 19   | <b>6.96</b> | <b>2.64</b> | <b>18.39</b> | 6 / 71     | 0.96        | 0.41        | 2.25        |
| Antimalarials                                                                                                                                                                                                                                                                                                                                                                                                                        | 8 / 60   | 2.28        | 0.88        | 5.92         | 19 / 366   | 0.96        | 0.57        | 1.60        |
| Sulfasalazine                                                                                                                                                                                                                                                                                                                                                                                                                        | 6 / 25   | <b>7.44</b> | <b>1.35</b> | <b>40.89</b> | 27 / 119   | <b>3.27</b> | <b>1.59</b> | <b>6.72</b> |
| Immunosuppressants                                                                                                                                                                                                                                                                                                                                                                                                                   | 19 / 83  | <b>3.95</b> | <b>1.24</b> | <b>12.59</b> | 19 / 193   | <b>1.98</b> | <b>1.09</b> | <b>3.58</b> |
| Rituximab                                                                                                                                                                                                                                                                                                                                                                                                                            | 12 / 52  | <b>3.50</b> | <b>1.11</b> | <b>11.07</b> | 30 / 140   | <b>5.16</b> | <b>3.00</b> | <b>8.89</b> |
| Other b/tsDMARDs                                                                                                                                                                                                                                                                                                                                                                                                                     | 25 / 261 | <b>2.76</b> | <b>1.14</b> | <b>6.70</b>  | 36 / 999   | 0.76        | 0.49        | 1.20        |
| Glucocorticoids (GCs)                                                                                                                                                                                                                                                                                                                                                                                                                |          |             |             |              |            |             |             |             |
| No GCs                                                                                                                                                                                                                                                                                                                                                                                                                               | 28 / 336 | 1           | [Reference] |              | 136 / 2081 | 1           | [Reference] |             |
| GCs 1-10mg/d                                                                                                                                                                                                                                                                                                                                                                                                                         | 51 / 266 | 1.61        | 0.86        | 3.02         | 119 / 797  | 1.44        | 0.94        | 2.19        |
| GCs > 10 mg/d                                                                                                                                                                                                                                                                                                                                                                                                                        | 30 / 120 | 1.71        | 0.94        | 3.10         | 19 / 105   | 1.69        | 0.80        | 3.59        |
| Missing values imputed via multiple imputation, patient numbers may thus be rounded. Effects significant at level $\alpha=0.05$ are marked in bold. Patients were excluded from a particular analysis if the medication they received provided $\leq 20$ patients for that analysis or if there were no deaths reported for that specific medication.                                                                                |          |             |             |              |            |             |             |             |
| CI, confidence interval; CTD, connective tissue diseases; CVD, cardiovascular disease; DA, disease activity; DMARD, disease modifying antirheumatic drugs; GC, Glucocorticoids; IJD, inflammatory joint diseases; IL, interleukin; JIA, juvenile idiopathic arthritis; N, number; OR, odds ratio; SLE, Systemic lupus erythematosus; TNF; tumour necrosis factor; tsDMARD, targeted synthetic disease modifying antirheumatic drugs. |          |             |             |              |            |             |             |             |

| Supplementary table 16. Multivariable logistic regression analysis of factors associated with COVID-19-related death stratified by glucocorticoid use |                    |             |             |             |                    |             |             |              |
|-------------------------------------------------------------------------------------------------------------------------------------------------------|--------------------|-------------|-------------|-------------|--------------------|-------------|-------------|--------------|
|                                                                                                                                                       | Glucocorticoids    |             |             |             | No glucocorticoids |             |             |              |
| N deaths/patients (%)                                                                                                                                 | 219 / 1288 (17.0%) |             |             |             | 165 / 2417 (6.8%)  |             |             |              |
|                                                                                                                                                       | N deaths/patients  | OR          | 95% CI      |             | N deaths/patients  | OR          | 95% CI      |              |
| Age, years                                                                                                                                            |                    |             |             |             |                    |             |             |              |
| Age ≤ 65                                                                                                                                              | 71 / 754           | 1           | [Reference] |             | 47 / 1811          | 1           | [Reference] |              |
| 65 years < Age ≤ 75                                                                                                                                   | 52 / 265           | <b>1.80</b> | <b>1.21</b> | <b>2.68</b> | 57 / 379           | <b>5.54</b> | <b>3.17</b> | <b>9.70</b>  |
| Age > 75                                                                                                                                              | 97 / 269           | <b>4.67</b> | <b>3.25</b> | <b>6.71</b> | 61 / 227           | <b>8.75</b> | <b>4.48</b> | <b>17.10</b> |
| Male sex (vs. female)                                                                                                                                 | 85 / 407           | 1.16        | 0.86        | 1.57        | 76 / 781           | <b>1.71</b> | <b>1.16</b> | <b>2.51</b>  |
| Ever smoked (vs. never)                                                                                                                               | 73 / 318           | 1.25        | 0.94        | 1.65        | 67 / 604           | 1.12        | 0.74        | 1.69         |
| Comorbidities                                                                                                                                         |                    |             |             |             |                    |             |             |              |
| Hypertension alone or CVD alone                                                                                                                       | 94 / 474           | 1.43        | 0.92        | 2.23        | 61 / 676           | 0.95        | 0.67        | 1.36         |
| Hypertension and CVD                                                                                                                                  | 54 / 154           | <b>1.87</b> | <b>1.09</b> | <b>3.22</b> | 35 / 147           | <b>1.86</b> | <b>1.28</b> | <b>2.71</b>  |
| Chronic lung disease                                                                                                                                  | 84 / 316           | <b>2.03</b> | <b>1.43</b> | <b>2.89</b> | 52 / 406           | 1.47        | 0.89        | 2.44         |
| Chronic kidney disease                                                                                                                                | 51 / 151           | 1.79        | 0.99        | 3.22        | 25 / 108           | 1.58        | 0.71        | 3.49         |
| Diabetes mellitus                                                                                                                                     | 55 / 215           | 1.32        | 0.76        | 2.31        | 41 / 293           | 1.51        | 0.97        | 2.35         |
| Rheumatic disease                                                                                                                                     |                    |             |             |             |                    |             |             |              |
| Rheumatoid arthritis                                                                                                                                  | 91 / 516           | 1           | [Reference] |             | 78 / 871           | 1           | [Reference] |              |
| Systemic lupus erythematosus                                                                                                                          | 26 / 198           | 1.20        | 0.63        | 2.31        | 10 / 193           | 1.11        | 0.40        | 3.07         |
| Vasculitis                                                                                                                                            | 58 / 240           | 0.95        | 0.51        | 1.76        | 9 / 85             | 0.57        | 0.11        | 3.11         |
| Other connective tissue diseases                                                                                                                      | 31 / 181           | 0.84        | 0.56        | 1.25        | 22 / 292           | <b>0.59</b> | <b>0.37</b> | <b>0.95</b>  |
| Psoriasis arthritis                                                                                                                                   | 4 / 53             | 0.52        | 0.11        | 2.50        | 15 / 376           | 0.68        | 0.41        | 1.15         |
| Spondyloarthritis                                                                                                                                     | 3 / 38             | 0.69        | 0.27        | 1.76        | 12 / 385           | 0.68        | 0.28        | 1.68         |
| Other inflammatory arthritis or non-systemic JIA                                                                                                      | 5 / 24             | 1.04        | 0.27        | 3.96        | 5 / 85             | 0.58        | 0.26        | 1.30         |

|                                                                 |          |             |             |              |          |             |             |             |
|-----------------------------------------------------------------|----------|-------------|-------------|--------------|----------|-------------|-------------|-------------|
| Other rheumatic diseases (not IJDs / CTDs / vasculitis)         | 7 / 69   | 0.48        | 0.17        | 1.33         | 17 / 160 | <b>0.51</b> | <b>0.28</b> | <b>0.91</b> |
| High/moderate/severe disease activity (DA) vs. remission/low DA | 80 / 386 | <b>1.95</b> | <b>1.30</b> | <b>2.92</b>  | 28 / 336 | 1.74        | 0.98        | 3.08        |
| Medication                                                      |          |             |             |              |          |             |             |             |
| Methotrexate                                                    | 18 / 212 | 1           | [Reference] | [Reference]  | 29 / 383 | 1           | [Reference] | [Reference] |
| No DMARD therapy                                                | 74 / 296 | <b>3.11</b> | <b>2.12</b> | <b>4.57</b>  | 50 / 444 | 1.72        | 0.94        | 3.17        |
| Leflunomide                                                     | 9 / 43   | <b>3.40</b> | <b>1.83</b> | <b>6.34</b>  | 3 / 47   | 0.52        | 0.17        | 1.63        |
| Antimalarials                                                   | 18 / 137 | <b>1.81</b> | <b>1.19</b> | <b>2.77</b>  | 9 / 289  | 0.59        | 0.26        | 1.33        |
| Sulfasalazine                                                   | 11 / 48  | <b>3.17</b> | <b>1.22</b> | <b>8.27</b>  | 22 / 96  | <b>4.00</b> | <b>1.72</b> | <b>9.28</b> |
| Immunosuppressants                                              | 24 / 176 | <b>2.27</b> | <b>1.61</b> | <b>3.19</b>  | 14 / 100 | <b>3.26</b> | <b>1.45</b> | <b>7.31</b> |
| Rituximab                                                       | 30 / 99  | <b>5.52</b> | <b>2.13</b> | <b>14.33</b> | 12 / 94  | <b>3.41</b> | <b>1.57</b> | <b>7.41</b> |
| Other b/tsDMARDs                                                | 35 / 289 | <b>1.78</b> | <b>1.13</b> | <b>2.81</b>  | 26 / 971 | 0.62        | 0.35        | 1.08        |

Missing values imputed via multiple imputation, patient numbers may thus be rounded. Effects significant at level  $\alpha=0.05$  are marked in bold. Patients were excluded from a particular analysis if the medication they received provided  $\leq 20$  patients for that analysis or if there were no deaths reported for that specific medication.

CI, confidence interval; CTD, connective tissue diseases; CVD, cardiovascular disease; DA, disease activity; DMARD, disease modifying antirheumatic drugs; GC, glucocorticoids; IJD, inflammatory joint diseases; IL, interleukin; JIA, juvenile idiopathic arthritis; N, number; OR, odds ratio; SLE, systemic lupus erythematosus; TNF, tumour necrosis factor; tsDMARD, targeted synthetic disease modifying antirheumatic drugs.
